# Supplementary material for: A saturated map of common genetic variants associated with human height
Source: Springer Nature journal article supplement (doi:10.1038/s41586-022-05275-y), 2022-10-12
Supplement: MOESM1 [file 41586_2022_5275_MOESM1_ESM.pdf]

**Supplementary information**

---

**A saturated map of common genetic variants associated with human height**

---

In the format provided by the authors and unedited

# A Saturated Map of Common Genetic Variants Associated with Human Height

Yengo L., Vedantam S., Marouli E., et al.

## TABLE OF CONTENTS

### Acknowledgements (p. 3)

### Supplementary Figures

[Suppl. Fig. 1.](#) Principal components analysis of contributing studies to the height meta-analysis alongside 26 genetic ancestry groups from the 1000 Genomes Project (p. 45).

[Suppl. Fig. 2.](#) Frequency and Imputation Accuracy distribution of HapMap 3 SNPs across five ancestry groups (p. 46).

[Suppl. Fig. 3.](#) Biases in conditional and joint analyses (p. 47).

[Suppl. Fig. 4.](#) Effect of collinearity on prediction accuracy of polygenic scores based on SNPs effects from conditional and joint analyses (p. 48).

[Suppl. Fig. 5.](#) Quantification of confounding due to population stratification in various European ancestry GWAS of height (p. 49).

[Suppl. Fig. 6.](#) Quantification of confounding due to population stratification in non-European ancestry GWAS meta-analyses (p. 50).

[Suppl. Fig. 7.](#) Quantification of confounding due to population stratification in the cross-ancestry GWAS meta-analysis (p. 51).

[Suppl. Figs. 8 - 12.](#) Correlation of marginal effects of genome-wide significant SNPs across ancestry groups (p. 52 – 56).

[Suppl. Fig. 13.](#) Correlation of marginal effects of sub-significant SNPs across ancestry groups (p. 57).

[Suppl. Fig. 14.](#) Replication of marginal associations in the Estonian Biobank (p. 58).

[Suppl. Fig. 15.](#) Schematic representation of the measure of signal density (p. 59).

[Suppl. Fig. 16.](#) Distribution of the density of genome-wide significant SNPs within 100 kb (p. 60).

[Suppl. Fig. 17.](#) Independent signal density at the *ACAN* gene locus across ancestries (p. 61).

[Suppl. Fig. 18 – 19.](#) Variance explained by SNPs within GWS loci (p. 62 – 63).

[Suppl. Fig. 20.](#) Optimal weighting of PGS and parental information in simulated data (p. 64).

[Suppl. Fig. 21.](#) Selection of the number of gene set clusters using the “Elbow method” (p. 65).

[Suppl. Fig. 22.](#) Heritability enrichment within gene sets prioritised with MAGMA and DEPICT (p. 66).

[Suppl. Fig. 23.](#) Gene-level saturation of GWAS discoveries as a function of sample size (p. 67 – 68).

[Suppl. Fig. 24.](#) Variant-level saturation of GWAS discoveries as a function of sample size (p. 69).

[Suppl. Fig. 25.](#) Partitioning of low-frequency SNP-based heritability within GWS loci (p. 70).

### Supplementary Notes

[Note 1.](#) Sensitivity Analyses of COJO results (p. 71).

[Note 2.](#) Investigation of population stratification in a large of height (p. 72).

[Note 3.](#) Distinguishing loss of tagging from multiplicity of causal variants at the *ACAN* locus (p. 77).

[Note 4.](#) Optimal weighting of PGS and parental information for height prediction (p. 78).

[Note 5.](#) Saturation of GWAS signals within pathways and gene sets (p. 84).

[Note 6.](#) Quantification of the enrichment of SNP-based heritability from low-frequency variants within loci containing common SNPs associated with height (p. 86).

### Supplementary Tables (additional data - spreadsheet)

[Suppl. Tab 1.](#) Study descriptive (and samples QC)

[Suppl. Tab 2.](#) Genotyping QC

[Suppl. Tab 3.](#) Phenotype Summary

[Suppl. Tab 4 – 8.](#) List of COJO SNPs from ancestry specific GWAS

[Suppl. Tab 9.](#) List of non-EUR ancestry specific COJO SNPs

[Suppl. Tab 10.](#) List of COJO-SNPs from trans-ancestry fixed-effect meta-analysis

[Suppl. Tab 11](#). List of OMIM genes

[Suppl. Tab 12](#). List of genome-wide significant loci

[Suppl. Tab 13](#). List of Top gene sets per cluster of pathways

[Suppl. Tab 14](#). List of OMIM genes per cluster of pathways

[Suppl. Tab 15](#). Similarity in gene prioritisation within and across ancestries

[Suppl. Tab 16](#). List of genes prioritised by summary data-based Mendelian Randomization

**Supplementary References** (p. 87)

## **ACKNOWLEDGEMENTS**

### **Cohort acknowledgements and detailed funding information**

#### **23andMe**

We would like to thank the research participants and employees of 23andMe for making this work possible. The following members of the 23andMe Research Team contributed to this study: Stella Aslibekyan, Adam Auton, Elizabeth Babalola, Robert K. Bell, Jessica Bielenberg, Katarzyna Bryc, Emily Bullis, Daniella Coker, Gabriel Cuellar Partida, Devika Dhamija, Sayantan Das, Sarah L. Elson, Teresa Filshstein, Kipper Fletez-Brant, Pierre Fontanillas, Will Freyman, Pooja M. Gandhi, Karl Heilbron, Barry Hicks, David A. Hinds, Ethan M. Jewett, Katelyn Kukar, Keng-Han Lin, Maya Lowe, Jey C. McCreight, Matthew H. McIntyre, Steven J. Micheletti, Meghan E. Moreno, Joanna L. Mountain, Priyanka Nandakumar, Elizabeth S. Noblin, Jared O'Connell, Aaron A. Petrakovitz, G. David Poznik, Morgan Schumacher, Anjali J. Shastri, Janie F. Shelton, Suyash Shringarpure, Vinh Tran, Joyce Y. Tung, Xin Wang, Wei Wang, Catherine H. Weldon, Peter Wilton, Alejandro Hernandez, Corinna Wong, Christophe Toukam Tchakouté.

#### **AFNET**

We would like to thank all investigators and patients participating in the EAST - AFNET 4 trial. EAST - AFNET 4 was supported by AFNET, EHRA, German Centre for Cardiovascular Research (DZHK), German heart Foundation (DSF), Sanofi, and Abbott. P.Ki. is partially supported by European Union BigData@Heart (grant agreement EU IMI 116074), British Heart Foundation (FS/13/43/30324; PG/17/30/32961 and PG/20/22/35093; AA/18/2/34218), German Centre for Cardiovascular Research supported by the German Ministry of Education and Research (DZHK), and Leducq Foundation. P.Ki. also receives research support for basic, translational, and clinical research projects from several drug and device companies active in atrial fibrillation and has received honoraria from several such companies in the past, but not in the last three years. PK is listed as inventor on two patents held by University of Birmingham (Atrial Fibrillation Therapy WO 2015140571, Markers for Atrial Fibrillation WO 2016012783).

#### **Age, gene/environment susceptibility Reykjavik study (AGES-RS)**

We want to thank the study participants for their participation. Age, Gene/Environment Susceptibility-Reykjavik Study (AGES) was funded by NIH contract N01-AG-1-2100 and HHSN271201200022C, the NIA Intramural Research Program, Hjartavernd (the Icelandic Heart Association), and the Althingi (the Icelandic Parliament).

#### **Aneurysm-Express (AAA)**

Claudia Tersteeg, Krista den Ouden, Mirjam B. Smeets, and Loes B. Collé are graciously acknowledged for their work on the DNA extraction. Astrid E.M.W. Willems, Evelyn Velema, Kristy M. J. Vons, Sara Bregman, Timo R. ten Brinke, Sara van Laar, Louise M. Catanzariti, Joyce E.P. Vrijenhoek, Sander M. van de Weg, Arjan H. Schoneveld, Arnold Koekman, Arjan Boltjes, Petra H. Homoed-van der Kraak, and Aryan Vink are graciously acknowledged for their past and continuing work on the Aneurysm-Express Biobank Study. We would also like to thank all the (former) employees involved in the Aneurysm-Express Biobank Study of the Departments of Surgery of the St. Antonius Hospital Nieuwegein and University Medical Center Utrecht for their continuing work. Dr. Sander W. van der Laan has received Roche funding for unrelated work. Lastly, we would like to thank all participants of the Aneurysm-Express Biobank Study; without you these kinds of studies would not be possible.

#### **Anglo-Scandinavian Cardiac Outcomes Trial UK (ASCOT UK)**

We thank all ASCOT trial participants, physicians, nurses, and practices in the participating countries for their important contribution to the study. In particular we thank Clare Muckian and David Toomey for their help in DNA extraction, storage, and handling. We also acknowledge support from the NIHR Barts Biomedical Research Centre and Queen Mary University of London, UK. This work was supported

by Pfizer, New York, NY, USA, for the ASCOT study and the collection of the ASCOT DNA repository; by Servier Research Group, Paris, France; and by Leo Laboratories, Copenhagen, Denmark. HRW acknowledges funding from the NIHR Cardiovascular Biomedical Research Centre at Barts and QMUL. We also acknowledge support from the NIHR Barts Biomedical Research Centre and Queen Mary University of London, UK for genotyping. JR acknowledges funding from the European Union's Horizon 2020 research and innovation programme under the Marie Skłodowska-Curie grant agreement No 786833.

### **Asian Indian Diabetic Heart Study/Sikh Diabetes Study (AIDHS/SDS)**

The AIDHS/SDS gratefully acknowledges the contributions of the participants and of the study staff. AIDHS/SDS was funded by NIH Grants (R01DK118427, R21DK105913)

### **Ather-Express (AE)**

Claudia Tersteeg, Krista den Ouden, Mirjam B. Smeets, and Loes B. Collé are graciously acknowledged for their work on the DNA extraction. Astrid E.M.W. Willems, Evelyn Velema, Kristy M. J. Vons, Sara Bregman, Timo R. ten Brinke, Sara van Laar, Louise M. Catanzariti, Joyce E.P. Vrijenhoek, Sander M. van de Weg, Arjan H. Schoneveld, Arnold Koekman, Arjan Boltjes, Petra H. Homoed-van der Kraak, and Aryan Vink are graciously acknowledged for their past and continuing work on the Athero-Express Biobank Study. We would also like to thank all the (former) employees involved in the Athero-Express Biobank Study of the Departments of Surgery of the St. Antonius Hospital Nieuwegein and University Medical Center Utrecht for their continuing work. Dr. Sander W. van der Laan has received Roche funding for unrelated work. Lastly, we would like to thank all participants of the Athero-Express Biobank Study; without you these kinds of studies would not be possible.

### **The Atherosclerosis Risk in Communities Study (ARIC)**

ARIC is a prospective epidemiologic study conducted in four U.S. communities (Wright JD, et al. The ARIC (Atherosclerosis Risk In Communities) Study: JACC Focus Seminar 3/8. J Am Coll Cardiol. 2021 Jun 15;77(23):2939-2959. PMID: 34112321). It is designed to investigate the causes of atherosclerosis and its clinical outcomes, and variation in cardiovascular risk factors, medical care, and disease by race, gender, location, and date. ARIC includes two parts: the Cohort Component and the Community Surveillance Component. The Cohort Component began in 1987, and each ARIC field center randomly selected and recruited a cohort sample of approximately 4,000 individuals aged 45-64 from a defined population in their community, to receive extensive examinations, including medical, social, and demographic data. Follow-up currently occurs semi-annually, by telephone, to maintain contact and to assess health status of the cohort. ARIC: The Atherosclerosis Risk in Communities study has been funded in whole or in part with Federal funds from the National Heart, Lung, and Blood Institute, National Institutes of Health, Department of Health and Human Services (contract numbers HHSN268201700001I, HHSN268201700002I, HHSN268201700003I, HHSN268201700004I and HHSN268201700005I), R01HL087641, R01HL086694; National Human Genome Research Institute contract U01HG004402; and National Institutes of Health contract HHSN268200625226C. The authors thank the staff and participants of the ARIC study for their important contributions. Infrastructure was partly supported by Grant Number UL1RR025005, a component of the National Institutes of Health and NIH Roadmap for Medical Research.

### **AugUR**

The AugUR study was supported by grants from the German Federal Ministry of Education and Research (BMBF 01ER1206, BMBF 01ER1507 to I.M.H.) and by the German Research Foundation (DFG; HE 3690/7-1 to I.M.H., BR 6028/2-1 to Caroline Brandl).

### **Austrian Stroke Prevention Study (ASPS), Austrian Stroke Prevention Family Study (ASPS-Fam)**

The Austrian Stroke Prevention Study (ASPS): The authors thank the staff and the participants for their valuable contributions. We thank Birgit Reinhart for her long-term administrative commitment, Elfi Hofer for the technical assistance at creating the DNA bank, Ing. Johann Semmler and Anita Harb for

DNA sequencing and DNA analyses by TaqMan assays and Irmgard Poelzl for supervising the quality management processes after ISO9001 at the biobanking and DNA analyses. The research reported in this article was funded by the Austrian Science Fond (FWF) grant number P20545-P05 and P13180 and supported by the Austrian National Bank Anniversary Fund, P15435, the Austrian Ministry of Science under the aegis of the EU Joint Programme-Neurodegenerative Disease Research (JPND)-[www.jpnd.eu](http://www.jpnd.eu) and by the Austrian Science Fund P20545-B05. The Medical University of Graz supports the databank of the ASPs.

### **Avon Longitudinal Study of Parents and Children (ALSPAC)**

The UK Medical Research Council and Wellcome (Grant ref: 217065/Z/19/Z) and the University of Bristol provide core support for ALSPAC. A comprehensive list of grants funding is available on the ALSPAC website. This research was specifically funded by Wellcome (Grant ref: WT088806 and WT092830/Z/10/Z). GWAS data was generated by Sample Logistics and Genotyping Facilities at Wellcome Sanger Institute and LabCorp (Laboratory Corporation of America) using support from 23andMe. NJT is a Wellcome Trust Investigator (202802/Z/16/Z), is the PI of the Avon Longitudinal Study of Parents and Children (MRC & WT 217065/Z/19/Z), is supported by the University of Bristol NIHR Biomedical Research Centre (BRC-1215-2001), the MRC Integrative Epidemiology Unit (MC\_UU\_00011/1) and works within the CRUK Integrative Cancer Epidemiology Programme (C18281/A29019). REM is a member of the MRC Integrative Epidemiology Unit at the University of Bristol funded by the MRC (MC\_UU\_00011/1). SH is supported by the UK National Institute for Health Research Academic Clinical Fellowship. This publication is the work of these authors and they will serve as guarantors for the contents of this paper. We are extremely grateful to all the families who took part in this study, the midwives for their help in recruiting them, and the whole ALSPAC team, which includes interviewers, computer and laboratory technicians, clerical workers, research scientists, volunteers, managers, receptionists and nurses.

### **Beijing Eye Study**

Supported by Beijing Municipal of Health Reform and Development Project #2019-4.

### **BioBank Japan Project**

Biobank Japan Project is supported by the Tailor-Made Medical Treatment program (the BioBank Japan Project) of the Ministry of Education, Culture, Sports, Science, and Technology (MEXT), the Japan Agency for Medical Research and Development (AMED).

### **BioMe**

RJFL is supported by the NIH (R01DK110113; R01DK075787; R01DK107786; R01HL142302; R01HG010297; R01DK124097; R01HL151152).

### **BioVU**

Vanderbilt University Medical Center's BioVU projects are supported by numerous sources: institutional funding, private agencies, and federal grants. These include the NIH funded Shared Instrumentation Grant S100D017985 and S10RR025141; CTSA grants UL1TR002243, UL1TR000445, and UL1RR024975. Genomic data have also been supported by investigator-led projects that include U01HG004798, R01NS032830, RC2GM092618, P50GM115305, U01HG006378, U19HL065962, R01HD074711; and additional funding sources listed at <https://vict.vumc.org/biovu-funding/>.

### **Blue Mountains Eye Study (BMES) / Lions Eye Institute (LEI)**

The Westmead/Sydney samples were collected in three studies that were supported by the National Health and Medical Research Council (NHMRC), Australia: Grant IDs 974159, 211069, 457349 and 512423 supported the Blue Mountains Eye Study that provided population-based controls; Grant ID 302010 supported the Cataract Surgery and Risk of Age-related Macular Degeneration study that provided clinic-based early and late AMD cases and controls; and Grant ID 571013 supported the Genes and Environment in late AMD study that provided clinic-based late AMD cases. The NHMRC had no role

in the design or conduct of these studies. DAM is supported by an NHMRC Practitioner Fellowship (GNT1154518). AWH is supported by an NHMRC Practitioner Fellowship (GNT1103329).

### **Bone Mineral Density in Childhood Study (BMDCS)**

We appreciate the dedication of the BMDCS study participants and their families, and the support of Dr. Karen Winer, Scientific Director of this effort. This study was funded by R01 HD58886, R01 HD100406, the Eunice Kennedy Shriver National Institute of Child Health and Human Development (NICHD) contracts (N01-HD-1-3228, -3329, -3330, -3331, -3332, -3333), and the CTSA program Grant 8 UL1 TR000077. S.F.A.G. is supported by the Daniel B. Burke Endowed Chair for Diabetes Research, R01 HD056465 and R01 HG010067.

### **BPROOF**

The authors gratefully thank all study participants, and all co-workers who helped to succeed this trial, especially P.H. in 't Veld, M. Hillen-Tijdink, A. Nicolaas-Merkus, N. Pliester, S. Oliai Araghi, and S. Smits. They also thank Prof. Dr. H.A.P. Pols for obtaining funding. The generation and management of GWAS genotype data for the B-PROOF study was executed by the Human Genotyping Facility of the Genetic Laboratory of the Department of Internal Medicine, Erasmus MC, Rotterdam. We thank Carolina Medina, Ph.D. and Jard de Vries for their help in creating the GWAS database and for the creation and analysis of imputed data. B-PROOF is supported and funded by The Netherlands Organization for Health Research and Development (ZonMw, Grant 6130.0031), The Hague; unrestricted grant from NZO (Dutch Dairy Association), Zoetermeer; NCHA (Netherlands Consortium Healthy Ageing) Leiden/Rotterdam; Ministry of Economic Affairs, Agriculture and Innovation (project KB-15-004-003), the Hague; Wageningen University, Wageningen; VU University Medical Center, Amsterdam; Erasmus MC, Rotterdam.

### **Breast Cancer Association Consortium (BCAC)**

BCAC is funded by the European Union's Horizon 2020 Research and Innovation Programme (grant numbers 634935 and 633784 for BRIDGES and B-CAST respectively), and the PERSPECTIVE I&I project, funded by the Government of Canada through Genome Canada and the Canadian Institutes of Health Research, the Ministère de l'Économie et de l'Innovation du Québec through Genome Québec, the Quebec Breast Cancer Foundation. The EU Horizon 2020 Research and Innovation Programme funding source had no role in study design, data collection, data analysis, data interpretation or writing of the report. Additional funding for BCAC is provided via the Confluence project which is funded with intramural funds from the National Cancer Institute Intramural Research Program, National Institutes of Health. Genotyping of the OncoArray was funded by the NIH Grant U19 CA148065, and Cancer UK Grant C1287/A16563 and the PERSPECTIVE project supported by the Government of Canada through Genome Canada and the Canadian Institutes of Health Research (grant GPH-129344) and, the Ministère de l'Économie, Science et Innovation du Québec through Genome Québec and the PSRSIIRI-701 grant, and the Quebec Breast Cancer Foundation. Funding for iCOGS came from: the European Community's Seventh Framework Programme under grant agreement n° 223175 (HEALTH-F2-2009-223175) (COGS), Cancer Research UK (C1287/A10118, C1287/A10710, C12292/A11174, C1281/A12014, C5047/A8384, C5047/A15007, C5047/A10692, C8197/A16565), the National Institutes of Health (CA128978) and Post-Cancer GWAS initiative (1U19 CA148537, 1U19 CA148065 and 1U19 CA148112 - the GAME-ON initiative), the Department of Defence (W81XWH-10-1-0341), the Canadian Institutes of Health Research (CIHR) for the CIHR Team in Familial Risks of Breast Cancer, and Komen Foundation for the Cure, the Breast Cancer Research Foundation, and the Ovarian Cancer Research Fund.

### **British 1958 birth cohort (B58C)**

We acknowledge use of phenotype and genotype data from the British 1958 Birth Cohort DNA collection, funded by the Medical Research Council grant G0000934 and the Wellcome Trust grant 068545/Z/02. Genotyping for the B58C-WTCCC subset was funded by the Wellcome Trust grant 076113/B/04/Z. The B58C-T1DGC genotyping utilized resources provided by the Type 1 Diabetes Genetics Consortium, a collaborative clinical study sponsored by the National Institute of Diabetes and

Digestive and Kidney Diseases (NIDDK), National Institute of Allergy and Infectious Diseases (NIAID), National Human Genome Research Institute (NHGRI), National Institute of Child Health and Human Development (NICHD), and Juvenile Diabetes Research Foundation International (JDRF) and supported by U01 DK062418. B58C-T1DGC GWAS data were deposited by the Diabetes and Inflammation Laboratory, Cambridge Institute for Medical Research (CIMR), University of Cambridge, which is funded by Juvenile Diabetes Research Foundation International, the Wellcome Trust and the National Institute for Health Research Cambridge Biomedical Research Centre; the CIMR is in receipt of a Wellcome Trust Strategic Award (079895). The B58C-GABRIEL genotyping was supported by a contract from the European Commission Framework Programme 6 (018996) and grants from the French Ministry of Research.

### **British Genetics of Hypertension (BRIGHT) study**

The BRIGHT study is extremely grateful to all the patients who participated in the study and the BRIGHT nursing team. This work formed part of the research themes contributing to the translational research portfolio for the NIHR Barts Cardiovascular Biomedical Research Centre. The funders had no role in study design, data collection and analysis. This work was funded by the Medical Research Council of Great Britain (grant number: G9521010D).

### **CARDIA**

The Coronary Artery Risk Development in Young Adults Study (CARDIA) is conducted and supported by the National Heart, Lung, and Blood Institute (NHLBI) in collaboration with the University of Alabama at Birmingham (HHSN268201800005I & HHSN268201800007I), Northwestern University (HHSN268201800003I), University of Minnesota (HHSN268201800006I), and Kaiser Foundation Research Institute (HHSN268201800004I).

### **CARDIOGENICS**

The main sponsor of Cardiogenics was the EU (LSHM-CT-2006-037593). Work supported by the Barts Biomedical Research Centre funded by the UK National Institute for Health Research (NIHR).

### **Cardio-metabolic Genome Epidemiology Network, GWAS1 (CAGE\_GWAS1) and Cardio-metabolic Genome Epidemiology Network, Amagasaki Study (CAGE-Amagasaki)**

The CAGE Network studies were supported by grants for the Core Research for Evolutional Science and Technology (CREST) from the Japan Science Technology Agency; the Program for Promotion of Fundamental Studies in Health Sciences, National Institute of Biomedical Innovation Organization (NIBIO); and the Grant of National Center for Global Health and Medicine (NCGM).

### **Cardiovascular Health Improvement Project (CHIP)**

CJW is supported by NIH grant R-35-HL135824.

### **Cardiovascular Health Study (CHS)**

This CHS research was supported by NHLBI contracts HHSN268201200036C, HHSN268200800007C, HHSN268200960009C, HHSN268201800001C, N01HC55222, N01HC85079, N01HC85080, N01HC85081, N01HC85082, N01HC85083, N01HC85086, 75N92021D00006; and NHLBI grants U01HL080295, R01HL085251, R01HL087652, R01HL105756, R01HL103612, R01HL120393, and U01HL130114 with additional contribution from the National Institute of Neurological Disorders and Stroke (NINDS). Additional support was provided through R01AG023629 from the National Institute on Aging (NIA). A full list of principal CHS investigators and institutions can be found at CHS-NHLBI.org. The provision of genotyping data was supported in part by the National Center for Advancing Translational Sciences, CTSI grant UL1TR001881, and the National Institute of Diabetes and Digestive and Kidney Disease Diabetes Research Center (DRC) grant DK063491 to the Southern California Diabetes Endocrinology Research Center. The content is solely the responsibility of the authors and does not necessarily represent the official views of the National Institutes of Health.



## **CATHGEN**

Dr. McGarrah is supported by NIH grant 5K08HL135275.

## **Catholic University Incheon ST Mary's Hospital Eye Study (EYE)**

The EYE gratefully acknowledges the contributions of the participants and of the study staff. YSC acknowledges support from the National Research Foundation of Korea (NRF) Grant (2020R111A2075302).

## **Cebu Longitudinal Health and Nutrition Survey (CLHNS)**

We thank the entire staff of the Office of Population Studies (OPS) Foundation in Cebu for their long-term work on the CLHNS. The CLHNS was supported by US National Institutes of Health grants DK078150, TW005596, HL085144; pilot funds from RR020649, ES010126, and DK056350; and the Office of Population Studies Foundation in Cebu. Additional support for data analysis was provided by US NIH R01DK072193. CNS was supported by American Heart Association postdoctoral fellowships 15POST24470131 and 17POST33650016.

## **Children's Hospital of Philadelphia - CHOP**

This research was financially supported by an Institute Development Award from the Children's Hospital of Philadelphia, a Research Development Award from the Cotswold Foundation, the Children's Hospital of Philadelphia Endowed Chair in Genomic Research, the Daniel B. Burke Endowed Chair for Diabetes Research and NIH grant R01 HD056465. The authors thank the network of primary care clinicians and the patients and families for their contribution to this project and to clinical research facilitated by the Pediatric Research Consortium (PeRC) at The Children's Hospital of Philadelphia. R. Chiavacci, E. Dabaghyan, A. (Hope) Thomas, K. Harden, A. Hill, C. Johnson-Honesty, C. Drummond, S. Harrison, F. Salley, C. Gibbons, K. Lilliston, C. Kim, E. Frackelton, F. Mentch, G. Otieno, K. Thomas, C. Hou, K. Thomas and M.L. Garris provided expert assistance with genotyping and/or data collection and management. The authors would also like to thank S. Kristinsson, L.A. Hermannsson and A. Krisbjörnsson of Raförnninn ehf for extensive software design and contributions.

## **China Health and Nutrition Survey (CHNS)**

We thank the participants, researchers and staff who contributed to the China Health and Nutrition Survey (CHNS). We are grateful to research grant funding from the National Institute for Health (NIH), the Eunice Kennedy Shriver National Institute of Child Health and Human Development (NICHD) for R01 HD30880, National Institute on Aging (NIA) for R01 AG065357, National Institute of Diabetes and Digestive and Kidney Diseases (NIDDK) for R01DK104371 and R01HL108427, the NIH Fogarty grant D43 TW009077 since 1989, and the China-Japan Friendship Hospital, Ministry of Health for support for CHNS 2009, Chinese National Human Genome Center at Shanghai since 2009, and Beijing Municipal Center for Disease Prevention and Control since 2011. We thank the National Institute for Nutrition and Health, China Center for Disease Control and Prevention. Additional support for data analysis was provided by US NIH R01DK072193. CNS was supported by American Heart Association postdoctoral fellowships 15POST24470131 and 17POST33650016.

## **China Kadoorie Biobank (CKB)**

CKB acknowledges the contribution of participants in the study and the members of the survey teams in each of the 10 regional centres, as well as the project development and management teams based at Beijing, Oxford, and the 10 regional centres. China Kadoorie Biobank was supported as follows: Baseline survey: Hong Kong Kadoorie Charitable Foundation; long-term follow-up, study support and maintenance: UK Wellcome Trust (212946/Z/18/Z, 202922/Z/16/Z, 104085/Z/14/Z, 088158/Z/09/Z), National Natural Science Foundation of China (91846303), and National Key Research and Development Program of China (2016YFC 0900500, 0900501, 0900504, 1303904). DNA extraction and genotyping: GlaxoSmithKline, UK Medical Research Council (MC\_PC\_13049, MC-PC-14135). The UK Medical Research Council (MC\_UU\_00017/1, MC\_UU\_12026/2, MC\_U137686851), Cancer Research UK (C16077/A29186, C500/A16896) and the British Heart Foundation

(CH/1996001/9454), provide core funding to the Clinical Trial Service Unit and Epidemiological Studies Unit at Oxford University for the project.

### **Cleveland Family Study**

The Cleveland Family Study has been supported by National Institutes of Health grants [R01-HL046380, KL2-RR024990, R35-HL135818, and R01-HL113338]. SR was funded by NHLBI R35HL135818; HL 046389; HL113338. BEC was funded by NIH grants [K01 HL135405, R03 HL154284].

### **Cohorte Lausannoise (CoLaus)**

The authors would like to thank all the people who participated in the recruitment of the participants, data collection and validation, particularly Nicole Bonvin, Yolande Barreau, Mathieu Firmann, François Bastardot, Julien Vaucher, Panagiotis Antiochos, Cédric Gubelmann, Marylène Bay and Benoit Delabays. The CoLaus study was and is supported by research grants from GlaxoSmithKline, the Faculty of Biology and Medicine of Lausanne, and the Swiss National Science Foundation (grants 33CS0-122661, 33CS30-139468, 33CS30-148401 and 33CS30\_177535/1).

### **Cooperative health research in the region of Augsburg (KORA)**

The KORA study was initiated and financed by the Helmholtz Zentrum München –German Research Center for Environmental Health, which is funded by the German Federal Ministry of Education and Research (BMBF) and by the State of Bavaria.

### **The Cooperative Health Research In South Tyrol Study (CHRIS)**

The CHRIS study was funded by the Department of Innovation, Research, and University of the Autonomous Province of Bolzano-South Tyrol. Full acknowledgements for the CHRIS study are reported here: <https://translational-medicine.biomedcentral.com/articles/10.1186/s12967-015-0704-9#Sec33>.

### **COPSAC2000**

We express our deepest gratitude to the children and families of the COPSAC2000 cohort for all their support and commitment. All funding received by COPSAC is listed on [www.copsac.com](http://www.copsac.com). The Lundbeck Foundation (Grant no. R16-A1694); The Ministry of Health (Grant no. 903516); Danish Council for Strategic Research (Grant no. 0603-00280B), and The Capital Region Research Foundation have provided core support to the COPSAC research center.

### **CROATIA-KORCULA**

The CROATIA studies gratefully acknowledge the contributions of the participants and of the many students and members of staff who supported the field work, including but not limited to those from The University of Split and Zagreb Medical Schools, the Institute for Anthropological Research in Zagreb, the Croatian Institute for Public Health. We are grateful to administrative teams in Croatia and Edinburgh. We acknowledge the Helmholtz Zentrum München, Neuherberg, Germany where the array-genotyping was performed. CROATIA studies were funded by grants from the Medical Research Council UK (<https://mrc.ukri.org/>), in particular MRC Programme Grants to the Human Genetics Unit, "QTL in health and disease", currently MC\_UU\_00007/10, the Republic of Croatia Ministry of Science, Education and Sports research grants to I.R. (108-1080315-0302), and European Commission Framework 6 project EUROSPAN (Contract No. LSHG-CT-2006-018947). VV is supported by the MRC Programme Grant to the Human Genetics Unit, "QTL in health and disease", currently MC\_UU\_00007/10. O.Po. is supported by the Croatian National Center of Research Excellence in Personalized Healthcare (grant number KK.01.1.1.01.0010); and the Center of Competence in Molecular Diagnostics (KK.01.2.2.03.0006).

### **CROATIA-VIS**

The CROATIA studies gratefully acknowledge the contributions of the participants and of the many students and members of staff who supported the field work, including but not limited to those from The University of Split and Zagreb Medical Schools, the Institute for Anthropological Research in Zagreb, the Croatian Institute for Public Health. We are grateful to administrative teams in Croatia and Edinburgh and acknowledge staff at the Wellcome Trust Clinical Research Facility, Edinburgh, UK for performing the array-genotyping. A.F. W. was supported by the MRC (<https://mrc.ukri.org/>) Programme Grant to the Human Genetics Unit, "QTL in health and disease".

### **DanFund**

This study was supported by TrygFonden (7-11-0213), the Lundbeck Foundation (R155-2013-14070), Novo Nordisk Foundation (NNF15OC0015896).

### **Danish National Birth Cohort (DNBC)**

We are very grateful to all DNBC families who took part in the study. We would also like to thank everyone involved in data collection and biological material handling. The Danish National Birth Cohort (DNBC) is a result of major grants from the Danish National Research Foundation, the Danish Pharmacists' Fund, the Egmont Foundation, the March of Dimes Birth Defects Foundation, the Augustinus Foundation, and the Health Fund of the Danish Health Insurance Societies. The DNBC biobank is a part of the Danish National Biobank resource, which is supported by the Novo Nordisk Foundation. The generation of GWAS genotype data for the DNBC samples was carried out within the Gene Environment Association Studies (GENEVA) consortium with funding provided through the National Institutes of Health's Genes, Environment, and Health Initiative (U01HG004423; U01HG004446; U01HG004438). BF received support from an Oak Foundation fellowship and a Novo Nordisk Foundation grant (12955). XL received support from the Nordic Center of Excellence in Health-Related e-Sciences.

### **deCODE**

We thank participants in deCODE cardiovascular- and obesity studies and collaborators for their cooperation.

### **DFAust**

Dr Fatkin is supported by the Victor Chang Cardiac Research Institute, NSW Health, and the National health and Medical Research Council of Australia (1186500).

### **Diabetes Genetics Initiative (DGI)**

The contribution of the Botnia and Skara research teams is gratefully acknowledged. DGI (Principal investigators Leif Groop and Tiinamaija Tuomi) and the Botnia Study is supported by the Sigrid Juselius Foundation, The Folkhalsan Research Foundation, Nordic Center of Excellence in Disease Genetics, EU (EXGENESIS), Finnish Diabetes Research Foundation, Foundation for Life and Health in Finland, Finnish Medical Society, Helsinki University Central Hospital Research Foundation, Perklén Foundation, Ollqvist Foundation, Narpes Health Care Foundation as well as the Municipal Health Care Center and Hospital in Jakobstad and Health Care Centers in Vasa, Narpes and Korsholm. The work in Malmö, Sweden, was also funded by a Linné grant from the Swedish Research Council (349-2006-237). Additionally supported by NIH R01DK075787. The GIANT Consortium is supported by R01DK075787 to J.N.H.

### **Diabetic Cohort (DC)**

The Diabetic Cohort (DC) was supported by the individual research grant from the National Medical Research Council (NMRC) and the Biomedical Research Council (BMRC) of Singapore.

### **DIACORE**

Cohort recruiting and management was funded by the KfH Stiftung Präventivmedizin e.V. (Carsten A. Böger). Genome-wide genotyping was funded the Else Kröner-Fresenius-Stiftung (2012\_A147), the KfH

Stiftung Präventivmedizin and the University Hospital Regensburg. The Deutsche Forschungsgemeinschaft (DFG, German Research Foundation) supported this work – Project-ID 387509280 – SFB 1350 (Subproject C6 to I.M.H.) and Iris Heid and Carsten Böger received funding by DFG BO 3815/4-1. This project has received funding from the Innovative Medicines Initiative 2 Joint Undertaking under grant agreement No 115974. This Joint Undertaking receives support from the European Union's Horizon 2020 research and innovation programme and EFPIA with JDRF (BEAT-DKD).

### **DiscovEHR (DiscovEHR and MyCode Community Health Initiative)**

Funding support from Regeneron Genetics Center.

### **Electronic Medical Records and Genomics Network (eMERGE)**

The eMERGE network gratefully acknowledges the contributions of the participants and of the study staff at each eMERGE site. This phase of the eMERGE Network was initiated and funded by the NHGRI through the following grants: U01HG008657 (Group Health Cooperative/University of Washington); U01HG008685 (Brigham and Women's Hospital); U01HG008672 (Vanderbilt University Medical Center); U01HG008666 (Cincinnati Children's Hospital Medical Center); U01HG006379 (Mayo Clinic); U01HG008679 (Geisinger Clinic); U01HG008680 (Columbia University Health Sciences); U01HG008684 (Children's Hospital of Philadelphia); U01HG008673 (Northwestern University); U01HG008701 (Vanderbilt University Medical Center serving as the Coordinating Center); U01HG008676 (Partners Healthcare/Broad Institute); U01HG008664 (Baylor College of Medicine); and U54MD007593 (Meharry Medical College). eMERGE Network Banner author list: Murray Brilliant, Wendy Chung, Paul Crane, Damien Croteau-Chonka, Josh Denny, Todd Edwards, Geoff Hayes, Scott Hebring, George Hripsak, Krzysztof Kiryluk, Terrie Kitchner, Iftikhar Kullo, Bahram Namjou, Peggy Peissig, Ning Shang, Digna Velez Edwards, Chunhua Weng.

### **European Prospective Investigation into Cancer and Nutrition (EPIC) - Potsdam cohort**

We thank the Human Study Centre (HSC) of the German Institute of Human Nutrition Potsdam-Rehbrücke, namely, the trustee and the data hub for the processing, and the participants for the provision of the data, the biobank for the processing of the biological samples, and the head of the HSC, Manuela Bergmann, for the contribution to the study design and leading the underlying processes of data generation. The recruitment phase of the EPIC-Potsdam Study was supported by the Federal Ministry of Science, Germany (01 EA 9401) and the European Union (SOC 95201408 05F02). The follow-up of the EPIC-Potsdam Study was supported by German Cancer Aid (70-2488-Ha I) and the European Community (SOC 98200769 05F02). This work was supported by a grant from the German Ministry of Education and Research (BMBF) and the State of Brandenburg (DZD grant 82DZD00302).

### **Epidemiologisch Preventief Onderzoek Zoetermeer (EPOZ)**

We are grateful to the contributions of the EPOZ study participants. HSHA was supported by ZonMW grant number 916.19.151.

### **Epihealth**

Funding from the Swedish research council.

### **Erasmus Rucphen Family study (ERF)**

We are grateful to all study participants and their relatives, general practitioners and neurologists for their contributions and to P. Veraart for her help in genealogy, J. Vergeer for the supervision of the laboratory work, both S.J. van der Lee and A. van der Spek for collection of the follow-up data and P. Snijders M.D. for his help in data collection of both baseline and follow-up data. Erasmus Rucphen Family (ERF) was supported by the Consortium for Systems Biology (NCSB), both within the framework of the Netherlands Genomics Initiative (NGI)/Netherlands Organisation for Scientific Research (NWO). ERF study as a part of EUROSPAN (European Special Populations Research Network) was supported by European Commission FP6 STRP grant number 018947 (LSHG-CT-2006-01947) and also received

funding from the European Community's Seventh Framework Programme (FP7/2007-2013)/grant agreement HEALTH-F4-2007-201413 by the European Commission under the programme "Quality of Life and Management of the Living Resources" of 5th Framework Programme (No. QLG2-CT-2002-01254) as well as FP7 project EUROHEADPAIN (nr 602633).

### **Estonian Biobank (EstBB)**

The EstBB gratefully acknowledges the contributions of the participants. Data analyses were carried out in part in the High-Performance Computing Center of University of Tartu. We would like to thank participants and support staff of Estonian Biobank. K.L. was supported by Estonian Research Council grants PUT 1371, EMBO Installation grant 3573, and The European Regional Development Fund. This study was funded by the European Union through the European Regional Development Fund (Project No. 2014-2020.4.01.15-0012 and Project No. 2014-2020.4.01.16-0125), by the European Union through Horizon 2020 grant no. 810645 and by the Estonian Research Council grants PUT (PRG687, PRG1291). T.E. was supported by Estonian Research Council grant PUT (PRG1291). A.M. was supported by the European Union through the European Regional Development Fund for the development of CoEs (Project No. 2014-2020.4.01.16-0125). K.P. was supported by the European Union through the European Regional Development Fund (Project No. 2014-2020.4.01.16-0030). Recruitment and maintenance of the EstBB is supported by annual funding from the Estonian Ministry of Social Affairs.

### **EUGENDA**

The EUGENDA cohort was funded by grants from the Oogfonds, MaculaFonds, Landelijke Stichting voor Blinden en Slechtzienden, Stichting Blindenhulp, Stichting A.F. Deutman Oogheelkunde Researchfonds, the Dutch Research Council (Vidi Innovational Research Award 016.096.309), and the European Research Council under the European Union's Seventh Framework Programme (FP/2007-2013) (ERC Grant Agreement no. 310644 MACULA). The EUGENDA samples were genotyped as part of the IAMDCG exome chip project supported by CIDR (contract number HHSN268201200008I) and funded by EY022310 (to Jonathan L. Haines, Case Western Reserve University, Cleveland) and 1 × 01HG006934-01 (to Gonçalo R. Abecasis, University of Michigan, Department of Biostatistics).

### **Exeter 10,000 Study (EXTEND)**

EXTEND is supported by the National Institute for Health Research Exeter Clinical Research Facility.

### **Ewha Womans University Hospital PCOS Study (pcosN)**

The pcosN gratefully acknowledges the contributions of the participants and of the study staff. YSC acknowledges support from the National Research Foundation of Korea (NRF) Grant (2020R111A2075302).

### **Family Heart Study (FamHS)**

FamHS acknowledges the contributions of the participants and of the study staff. FamHS was funded by NIDDK R01-DK-089256 and NHLBI R01HL117078.

### **The Fenland Study (Fenland)**

We are grateful to all the volunteers and to the General Practitioners and practice staff for assistance with recruitment. We thank the Fenland Study Investigators, Fenland Study Co-ordination team and the Epidemiology Field, Data and Laboratory teams. The Fenland Study (10.22025/2017.10.101.00001) is funded by the Medical Research Council (MC\_UU\_12015/1). We further acknowledge support for genotyping from the Medical Research Council (MC\_PC\_13046).

### **Finland-United States Investigation of NIDDM Genetics (FUSION)**

We would like to thank the Finnish volunteers who generously participated in the FUSION study. Support for FUSION was provided by NIH grants R01-DK062370 (M.B.), R01-DK072193 (K.L.M.), and intramural project number 1Z01-HG000024 (F.S.C.). Genome-wide genotyping was conducted by the

Johns Hopkins University Genetic Resources Core Facility SNP Center at the Center for Inherited Disease Research (CIDR), with support from CIDR NIH contract no. N01-HG-65403.

### **The Finnish Cardiovascular Study (FINCAVAS)**

The authors thank the staff of the Department of Clinical Physiology for collecting the exercise test data. The Finnish Cardiovascular Study (FINCAVAS) has been financially supported by the Competitive Research Funding of the Tampere University Hospital (Grant 9M048 and 9N035), the Finnish Cultural Foundation, the Finnish Foundation for Cardiovascular Research, the Emil Aaltonen Foundation, Finland, the Tampere Tuberculosis Foundation, EU Horizon 2020 (grant 755320 for TAXINOMISIS and grant 848146 for To Aition), and the Academy of Finland grant 322098.

### **Finnish Twin Cohort Study (FTC)**

We thank the twins for active participations and the staff of the study for their hard work. Phenotype and genotype data collection in the twin cohort has been supported by the Wellcome Trust Sanger Institute, the Broad Institute, ENGAGE – European Network for Genetic and Genomic Epidemiology, FP7-HEALTH-F4-2007, grant agreement number 201413, National Institute of Alcohol Abuse and Alcoholism (grants AA-12502, AA-00145, and AA-09203 to R J Rose and AA15416 and K02AA018755 to D M Dick) and the Academy of Finland (grants 100499, 205585, 118555, 141054, 264146, 308248, and 312073 to JKaprio). JKaprio acknowledges support by the Academy of Finland (grants 265240, 263278).

### **FINRISK**

The FINRISK surveys have been mainly funded by budgetary funds from THL. Additional funding has been obtained from the Academy of Finland and various domestic foundations.

### **Framingham Heart Study**

This research was conducted in part using data and resources from the Framingham Heart Study of the National Heart Lung and Blood Institute of the National Institutes of Health and Boston University School of Medicine. The analyses reflect intellectual input and resource development from the Framingham Heart Study investigators participating in the SNP Health Association Resource (SHARe) project. This work was partially supported by the National Heart, Lung and Blood Institute's Framingham Heart Study (Contract Nos. N01-HC-25195 and HHSN268201500001I) and its contract with Affymetrix, Inc for genotyping services (Contract No. N02-HL-6-4278). A portion of this research utilized the Linux Cluster for Genetic Analysis (LinGA-II) funded by the Robert Dawson Evans Endowment of the Department of Medicine at Boston University School of Medicine and Boston Medical Center. This research was partially supported by grant R01-DK122503 from the National Institute of Diabetes and Digestive and Kidney.

### **GENAF**

The GENAF study is funded by the Norwegian Research Council with a Mobility Grant (240149) and Young Research Talent grant (287086); the South-Eastern Health Authorities with a PhD-grant (2019122); Vestre Viken Hospital Trust with a PhD-grant; afib.no - the Norwegian Atrial Fibrillation Research Network; "Indremedisinsk Forskningsfond" at Bærum Hospital.

### **Gene-Lifestyle Interactions and Complex Traits Involved in Elevated Disease Risk V2 (GLACIERV2)**

We are grateful to the study participants, health professionals, investigators, data managers and support staff who have contributed to GLACIERV2 and to the Northern Sweden Health and Disease Study. Individual investigator effort was funded by Swedish Research Council, Novo Nordisk Foundation, Swedish Heart Lung Foundation, and European Research Council (CoG-2015\_681742\_NASCENT).

### **Generation Scotland (GS)**

We are grateful to all the families who took part, the general practitioners and the Scottish School of Primary Care for their help in recruiting them, and the whole Generation Scotland team, which includes interviewers, computer and laboratory technicians, clerical workers, research scientists, volunteers, managers, receptionists, healthcare assistants and nurses. Generation Scotland received core support from the Chief Scientist Office of the Scottish Government Health Directorates [CZD/16/6] and the Scottish Funding Council [HR03006] and is currently supported by the Wellcome Trust [216767/Z/19/Z]. Genotyping of the GS:SFHS samples was carried out by the Genetics Core Laboratory at the Edinburgh Clinical Research Facility, University of Edinburgh, Scotland and was funded by the Medical Research Council UK and the Wellcome Trust (Wellcome Trust Strategic Award “STratifying Resilience and Depression Longitudinally” (STRADL) Reference 104036/Z/14/Z).

### **GeneRISK**

The GeneRISK study was funded by Business Finland through the Personalized Diagnostics and Care program coordinated by SalWe Ltd (Grant No 3986/31/2013). SR was supported by the Academy of Finland Center of Excellence in Complex Disease Genetics (Grant No 312062), the Finnish Foundation for Cardiovascular Research, the Sigrid Juselius Foundation and University of Helsinki HiLIFE Fellow and Grand Challenge grants. EW was supported by the Finnish innovation fund Sitra (EW) and Finska Läkaresällskapet.

### **Genes for Good**

Genes for Good gratefully acknowledges the generous contributions from its research participants and the work of its administrative staff for making the study possible. Genes for Good was funded through University of Michigan discretionary funds.

### **Genetic Epidemiology Network of Arteriopathy (GENOA)**

Genotyping was performed at the Mayo Clinic (Stephen Turner, Mariza de Andrade, Julie Cunningham) and was made possible by the University of Texas Health Sciences Center (Eric Boerwinkle, Megan Grove-Gaona). We would also like to thank the families that participated in the GENOA study. Support for GENOA was provided by the National Heart, Lung and Blood Institute (U01 HL054457, U01 HL054464, U01 HL054481, R01 HL119443, and R01 HL087660) of the National Institutes of Health.

### **Genetic Overlap between Metabolic and Psychiatric traits (GOMAP)**

We thank all participants for their important contribution. We are grateful to Georgia Markou, Laiko General Hospital Diabetes Centre, Maria Emetsidou and Panagiota Fotinopoulou, Hippokratio General Hospital Diabetes Centre, Athina Karabela, Dafni Psychiatric Hospital, Eirini Glezou and Marios Mangioros, Dromokaiteio Psychiatric Hospital, Angela Rentari, Harokopio University of Athens, and Danielle Walker, Wellcome Trust Sanger Institute. This work was funded by the Wellcome Trust (098051).

### **Genetic Park of Cilento and Vallo di Diano Project (Cilento)**

The Cilento gratefully acknowledges the population for their participation and the study staff. The Cilento was funded by grants from the Italian Ministry of Universities (IDF SHARID ARS01\_01270), the Assessorato Ricerca Regione Campania (POR CAMPANIA 2000/2006 MISURA 3.16).

### **Genetics of Early-Onset Stroke (GEOS)**

The research team gratefully acknowledges the contributions of the participants in the GEOS study. The GEOS Study was supported by the National Institutes of Health Genes, Environment and Health Initiative (GEI) Grant U01 HG004436, as part of the GENEVA consortium under GEI, with additional support provided by the Mid-Atlantic Nutrition and Obesity Research Center (P30 DK072488); and the Office of Research and Development, Medical Research Service, and the Baltimore Geriatrics Research, Education, and Clinical Center of the Department of Veterans Affairs. Genotyping services were provided by the Johns Hopkins University Center for Inherited Disease Research (CIDR), which is fully funded through a federal contract from the National Institutes of Health to the Johns Hopkins University

(contract number HHSN268200782096C). Assistance with data cleaning was provided by the GENEVA Coordinating Center (U01 HG 004446; PI Bruce S Weir). Study recruitment and assembly of datasets were supported by a Cooperative Agreement with the Division of Adult and Community Health, Centers for Disease Control and Prevention, and by grants from the National Institute of Neurological Disorders and Stroke (NINDS) and the NIH Office of Research on Women's Health (R01 NS45012, U01 NS069208-01). Dr. Cole was partially supported by an American Heart Association (AHA)-Bayer Discovery Grant (Grant 17IBDG33700328), the AHA Cardiovascular Genome-Phenome Study (Grant-15GPSPG23770000), NIH (Grants: R01-NS114045; R01-NS100178; R01-NS105150), and the US Department of Veterans Affairs.

### **Genetics of Lipid Lowering Drugs and Diet Network (GOLDN)**

GOLDN acknowledges the contributions of the participants and of the study staff. GOLDN was funded by the NHLBI grants R01 HL09135701, R01 HL091357 and R01 HL104135.

### **German Chronic Kidney Disease Study (GCKD)**

We are grateful for the willingness of the patients to participate in the GCKD study. The enormous effort of the study personnel of the various regional centers is highly appreciated. We thank the large number of nephrologists who provide routine care for the patients and collaborate with the GCKD study. The GCKD study was/is funded by grants from the Federal Ministry of Education and Research (BMBF, grant number 01ER0804, K.U.E.) and the KfH Foundation for Preventive Medicine. Genotyping was supported by Bayer Pharma AG. The work of A.K. was supported by the German Research Foundation (DFG) - Project-ID 431984000 - SFB 1453, and DFG grant KO 3598/5-1. The work of M.W. was supported by the German Research Foundation (DFG) - Project-ID 431984000 - SFB 1453.

### **GerMiFS**

The GerMiFS gratefully acknowledges the contributions of the participants and of the study staff.

### **GGAF**

The GGAF is supported by funding to the 5 sources that form GGAF. The AF RISK study is supported by the Netherlands Heart Foundation (grant NHS2010B233), and the Center for Translational Molecular Medicine. Both the Young-AF and Biomarker-AF studies are supported by funding from the University Medical Center Groningen. The GIPS-III trial was supported by grant 95103007 from ZonMw, the Netherlands Organization for Health Research and Development. The PREVEND study is supported by the Dutch Kidney Foundation (grant E0.13) and the Netherlands Heart Foundation (grant NHS2010B280). Prof.Dr. Rienstra acknowledges support from the Netherlands Cardiovascular Research Initiative: an initiative supported by the Netherlands Heart Foundation, CVON 2014-9: "Reappraisal of Atrial Fibrillation: interaction between hyperCoagulability, Electrical remodelling, and Vascular destabilization in the progression of AF (RACE V)".

### **GoDARTS**

We are grateful to all the participants in this study, the general practitioners, the Scottish School of Primary Care for their help in recruiting the participants, and to the whole team, which includes interviewers, computer and laboratory technicians, clerical workers, research scientists, volunteers, managers, receptionists, and nurses. The study complies with the Declaration of Helsinki. We acknowledge the support of the Health Informatics Centre, University of Dundee for managing and supplying the anonymised data and NHS Tayside, the original data owner. M.I.M. was a Wellcome Investigator and NIHR Senior Investigator. This work was supported by: NIDDK (U01-DK105535) and Wellcome (090532, 098381, 106130, 203141, 212259). The Wellcome Trust United Kingdom Type 2 Diabetes Case Control Collection (GoDARTS) was funded by The Wellcome Trust (072960/Z/03/Z, 084726/Z/08/Z, 084727/Z/08/Z, 085475/Z/08/Z, 085475/B/08/Z). GoDARTS was funded by the Wellcome Trust (084727/Z/08/Z, 085475/Z/08/Z, 085475/B/08/Z) and as part of the EU IMI-SUMMIT program.



## **GRADE**

Supported by NIH-NHLBI R01 HL77398.

## **GRAPHIC (Genetic Regulation of Arterial Pressure In humans in the Community)**

C.P.N is funded by the BHF (SP/16/4/32697). C.P.N., P.S.B. and N.J.S. are supported by the National Institute for Health Research (NIHR) Leicester Cardiovascular Biomedical Research Centre (BRC-1215-20010).

## **Greek Recurrent Myocardial Infarction Cohort (GRMIC)**

The GRMIC thanks all study participants who contributed to this study and all individuals who have contributed to patients' recruitments and sample collection. This work was supported by the British Heart Foundation (BHF) grant RG/14/5/30893 (P.D.) and forms part of the research themes contributing to the translational research portfolios of the Barts Biomedical Research Centre funded by the UK National Institute for Health Research (NIHR). O.G. received funding from the British Heart Foundation (BHF) (FS/14/66/3129).

## **Health**

The Health2006 was financially supported by grants from the Velux Foundation; The Danish Medical Research Council, Danish Agency for Science, Technology and Innovation; The Aase and Ejner Danielsens Foundation; ALK-Abello A/S, Hørsholm, Denmark, and Research Centre for Prevention and Health, the Capital Region of Denmark. Health2008 was supported by the Timber Merchant Vilhelm Bang's Foundation, the Danish Heart Foundation (Grant number 07-10-R61-A1754-B838-22392F), and the Health Insurance Foundation (Helsefonden) (Grant number 2012B233).

## **The Health, Aging and Body Composition Study (Health ABC Study)**

This research was supported by National Institute on Aging (NIA) Contracts N01-AG-6-2101; N01-AG-6-2103; N01-AG-6-2106; NIA grant R01-AG028050, and NINR grant R01-NR012459. This research was funded in part by the Intramural Research Program of the NIH, National Institute on Aging.

## **Healthy Aging in Neighborhoods of Diversity across the Life Span (HANDLS)**

We thank all HANDLS participants for their commitment to and participation in the study. HANDLS is funded by the NIA Intramural Research Program Project Number AG000513.

## **Health and Retirement Study (HRS)**

HRS is supported by the National Institute on Aging (NIA U01AG009740). The genotyping was funded separately by the National Institute on Aging (RC2 AG036495, RC4 AG039029). Our genotyping was conducted by the NIH Center for Inherited Disease Research (CIDR) at Johns Hopkins University. Genotyping quality control and final preparation of the data were performed by the Genetics Coordinating Center at the University of Washington and the School of Public Health at the University of Michigan. Additional funding from US National Institutes of Health grants U01AG009740, RC2 AG036495, RC4 AG039029.

## **Health Professionals Follow-up Study (HPFS)**

We are grateful to the participants and staff of the Health Professionals Follow-Up Study for their valuable contributions. The Health Professionals Follow-up Study was supported by grants UM1CA167552, CA141298, and P01CA055075.

## **Heinz Nixdorf Recall Study (HNR)**

The HNR study is indebted to all study participants and to both the dedicated personnel of the study center of the Heinz Nixdorf Recall study and to the investigative group. The HNR study thanks the Heinz Nixdorf Foundation for their generous support of this study. Parts of the study were also supported by the German Research Council (DFG) [DFG project: EI 969/2-3, ER 155/6-1;6-2, HO 3314/2-1;2-2;2-3;4-3, INST 58219/32-1, JO 170/8-1, KN 885/3-1, PE 2309/2-1, SI 236/8-1;9-1;10-1,], the German Ministry

of Education and Science [BMBF project: 01EG0401, 01GI0856, 01GI0860, 01GS0820\_WB2-C, 01ER1001D, 01GI0205], the Ministry of Innovation, Science, Research and Technology, North Rhine-Westphalia (MIWFT-NRW).

### **Hellenic Isolated Cohorts MANOLIS (HELIC-MANOLIS)**

The MANOLIS cohort is named in honour of Manolis Giannakakis, 1978-2010. We thank the residents of Anogia and surrounding Mylopotamos villages, and of the Pomak villages, for taking part. The HELIC study has been supported by many individuals who have contributed to sample collection (including Antonis Athanasiadis, Olina Balafouti, Christina Batzaki, Georgios Daskalakis, Eleni Emmanouil, Chrisoula Giannakaki, Margarita Giannakopoulou, Anastasia Kaparou, Vasiliki Kariakli, Stella Koinaki, Dimitra Kokori, Maria Konidari, Hara Koundouraki, Dimitris Koutoukidis, Vasiliki Mamakou, Eirini Mamalaki, Eirini Mpamiaki, Maria Tsoukana, Dimitra Tzakou, Katerina Vosdogianni, Niovi Xenaki, Eleni Zengini), data entry (Thanos Antonos, Dimitra Papagrigoriou, Betty Spiliopoulou), sample logistics (Sarah Edkins, Emma Gray), genotyping (Robert Andrews, Hannah Blackburn, Doug Simpkin, Siobhan Whitehead), research administration (Anja Kolb-Kokocinski, Carol Smees, Danielle Walker) and informatics (Martin Pollard, Josh Randall). This work was funded by the Wellcome Trust (098051) and the European Research Council (ERC-2011-StG 280559-SEPI).

### **Hellenic Isolated Cohorts Pomak (HELIC-Pomak)**

This work was funded by the Wellcome Trust (098051) and the European Research Council (ERC-2011-StG 280559-SEPI).

### **The Hispanic Community Health Study / Study of Latinos (HCHS/SOL)**

The Hispanic Community Health Study / Study of Latinos (HCHS/SOL) is a multi-center study of Hispanic/Latino populations with the goal of determining the role of acculturation in the prevalence and development of diseases, and to identify other traits that impact Hispanic/Latino health. The study is sponsored by the National Heart, Lung, and Blood Institute (NHLBI) and other institutes, centers, and offices of the National Institutes of Health (NIH). Recruitment began in 2006 with a target population of 16,000 persons of Cuban, Puerto Rican, Dominican, Mexican or Central/South American origin. Household sampling was employed as part of the study design. Participants were recruited through four sites affiliated with San Diego State University, Northwestern University in Chicago, Albert Einstein College of Medicine in Bronx, New York, and the University of Miami. Researchers from seven academic centers provided scientific and logistical support. Study participants who were self-identified Hispanic/Latino and aged 18-74 years underwent extensive psycho-social and clinical assessments during 2008-2011. A re-examination of the HCHS/SOL cohort is conducted during 2015-2017. Annual telephone follow-up interviews are ongoing since study inception to determine health outcomes of interest. (dbGaP study accession number: phs000555). HCHS/SOL: Primary funding support to Dr. North and colleagues is provided by U01HG007416. Additional support was provided via R01DK101855 and 15GRNT25880008. The HCHS/SOL study was carried out as a collaborative study supported by contracts from the National Heart, Lung, and Blood Institute (NHLBI) to the University of North Carolina (N01-HC65233), University of Miami (N01-HC65234), Albert Einstein College of Medicine (N01-HC65235), Northwestern University (N01-HC65236), and San Diego State University (N01-HC65237). The following Institutes/Centers/Offices contribute to the HCHS/SOL through a transfer of funds to the NHLBI: NIMHD, National Institute on Deafness and Other Communication Disorders, National Institute of Dental and Craniofacial Research, National Institute of Diabetes and Digestive and Kidney Diseases, National Institute of Neurological Disorders and Stroke, NIH Institution-Office of Dietary Supplements.

### **Hoorn DCS Cohort**

The authors thank participants and staff of the Diabetes Care System West-Friesland. The DCS study was supported by a grant from the Foundation for the National Institutes of Health through the Accelerating Medicines Partnership (no. HART17AMP) and the Dutch String of Pearls Initiative. The Hoorn study was supported by the Amsterdam University Medical Center, Location VUmc.

### **Hunter Community Study (HCS)**

The authors would like to thank the men and women participating in the HCS as well as all the staff, investigators and collaborators who have supported or been involved in the project to date. The University of Newcastle provided \$300 000 from its Strategic Initiatives Fund, and \$600 000 from the Gladys M Brawn Senior Research Fellowship scheme; Vincent Fairfax Family Foundation, a private philanthropic trust, provided \$195 000; The Hunter Medical Research Institute provided media support during the initial recruitment of participants.

### **HyperGen-Axiom (Hypertension Genetic Epidemiology Network Axiom chip data)**

The HyperGen-Axiom was funded by NIH grant R01HL086718. XZ was funded by NHGRI HG011052.

### **HyperGEN - Genetic Epidemiology of Hypertension Network**

HyperGEN was funded by NIH cooperative agreement grants HL54471, HL54472, HL54473, HL54495, HL54496, HL54509, HL54515.

### **Hypertension and Insulin Resistance (HTN-IR)**

Supported in part by the Hypertension and Insulin Resistance (HTN-IR) contracts R01-HL067974, R01-HL-55005, R01-HL 067974.

### **Indian Diabetes Consortium (INDICO)**

The INDICO gratefully acknowledges the contributions of the participants and the study staff. INDICO was supported by Council of Scientific and Industrial Research (CSIR), Government of India through Centre for Cardiovascular and Metabolic Disease Research (CARDIOMED) project (Grant no. BSC0122); also partially funded by Department of Science and Technology, Government of India through PURSE II CDST/SR/PURSE PHASE II/11 provide to Jawaharlal Nehru University, New Delhi, INDIA.

### **Indian Diabetes Prevention Study 3 (IDPP3)**

The IDPP3 gratefully acknowledges the participants of the volunteers in the study and the field staff who followed the volunteers on regular basis. Investigator support from the Council of Scientific and Industrial Research, Ministry of Science and Technology, Govt. of India, New delhi, India.

### **INGI-FVG (INGI-Friuli Venezia Giulia)**

The authors gratefully acknowledge the subjects from the INGI-FVG cohort. This study was funded by 5 per mille 2015 senses, Genetics of senses and related diseases, CUP: C92F17003560001, to PG.

### **INSPIRE\_AF**

Dr Cutler is supported by funding from the Dell Loy Hansen Heart Foundation.

### **Inter99**

The Inter99 was initiated by Torben Jørgensen (PI), Knut Borch-Johnsen (co-PI), Hans Ibsen and Troels F. Thomsen. The steering committee comprises the former two and Charlotta Pisinger. The study was financially supported by research grants from the Danish Research Council, the Danish Centre for Health Technology Assessment, Novo Nordisk Inc., Research Foundation of Copenhagen County, Ministry of Internal Affairs and Health, the Danish Heart Foundation, the Danish Pharmaceutical Association, the Augustinus Foundation, the Ib Henriksen Foundation, the Becket Foundation, and the Danish Diabetes Association. Novo Nordisk Foundation Center for Basic Metabolic Research is an independent Research Center, based at the University of Copenhagen, Denmark and partially funded by an unconditional donation from the Novo Nordisk Foundation ([www.cbmr.ku.dk](http://www.cbmr.ku.dk)) (Grant number NNF18CC0034900).

### **Invecchiare in Chianti (InCHIANTI)**

The InCHIANTI study baseline (1998-2000) was supported as a "targeted project" (ICS110.1/RF97.71) by the Italian Ministry of Health and in part by the U.S. National Institute on Aging (Contracts: 263 MD 9164 and 263 MD 821336); the InCHIANTI Follow-up 1 (2001-2003) was funded by the U.S. National Institute on Aging (Contracts: N.1-AG-1-1 and N.1-AG-1-2111).

### **iPSYCH**

Analyses of the iPSYCH cohort was conducted on the GenomeDenmark and Computerome High Performance Computing facilities. iPSYCH was supported by The Lundbeck Foundation, the Stanley Medical Research Institute, the Aarhus and Copenhagen universities and university hospitals; the research was conducted using the Danish National Biobank resource, supported by the Novo Nordisk Foundation.

### **Jackson Heart Study (JHS)**

The Jackson Heart Study (JHS) is supported and conducted in collaboration with Jackson State University (HHSN268201800013I), Tougaloo College (HHSN268201800014I), the Mississippi State Department of Health (HHSN268201800015I) and the University of Mississippi Medical Center (HHSN268201800010I, HHSN268201800011I and HHSN268201800012I) contracts from the National Heart, Lung, and Blood Institute (NHLBI) and the National Institute on Minority Health and Health Disparities (NIMHD). The authors also wish to thank the staffs and participants of the JHS. The views expressed in this manuscript are those of the authors and do not necessarily represent the views of the National Heart, Lung, and Blood Institute; the National Institutes of Health; or the U.S. Department of Health and Human Services. The project described was supported by the National Center for Advancing Translational Sciences, National Institutes of Health, through Grant KL2TR002490 (LMR). LMR was also supported by T32HL129982.

### **Japan PGx Data Science Consortium (JPDSC)**

The authors thank the Japan PGx Data Science Consortium (JPDSC) for kindly providing genotype and phenotype data. The JPDSC was comprised of six pharmaceutical companies in Japan, namely Astellas Pharma, Inc.; Daiichi Sankyo Co., Ltd.; Mitsubishi Tanabe Pharma Corporation; Otsuka Pharmaceutical Co., Ltd.; Taisho Pharmaceutical Co., Ltd.; and Takeda Pharmaceutical Co., Ltd.

### **JHU\_AF**

Dr. Nazarian is supported by grants from the US NIH/NHLBI, as well as Biosense Webster, ImriCor, and ADAS software.

### **Johnston County Osteoarthritis Project (JoCoOA)**

The investigators wish to thank the staff and participants in the Johnston County Osteoarthritis Project, without whom this work would not be possible. The JoCoOA is supported in part by S043, S1734, & S3486 from the CDC/Association of Schools of Public Health; 5-P60-AR30701 & 5-P60-AR49465 from NIAMS/NIH, and U01 DP003206, U01 DP006266 from the CDC.

### **Justification for the Use of Statins in Primary Prevention: an Intervention Trial Evaluating Rosuvastatin (JUPITER)**

The JUPITER trial (PI: Ridker) and its substudy for genetics (Pis: Chasman and Ridker) were funded by Astra-Zeneca.

### **Kangbuk Samsung Cohort Study (KSCS)**

The KSCS gratefully acknowledges the contributions of the participants and of the study staff. We are thankful for the computing resources provided by the Global Science experimental Data hub Center (GSDC) Project and the Korea Research Environment Open NETwork (KREONET) of the Korea Institute of Science and Technology Information (KISTI). HNK acknowledges support from the National Research Foundation of Korea (NRF) Grant (NRF-2020R1A2C1012931) and the Medical Research Funds from Kangbuk Samsung Hospital.

### **Kita-Nagoya Genome Epidemiology Study (CAGE-KING)**

CAGE-KING was supported in part by Grants-in-Aid from MEXT (nos. 24390169, 16H05250, 15K19242, 16H06277, 19K19434, 20K10514, 21H03206) as well as by a grant from the Funding Program for Next-Generation World-Leading Researchers (NEXT Program, no. LS056).

### **Korea Association Resource (KARE)**

This study was conducted with bioresources from National Biobank of Korea, the Korea Disease Control and Prevention Agency, Republic of Korea. The Korean Association Resource (KARE) was supported by grants from National Institute of Health, Republic of Korea (4845-301, 4851-302, 4851-307) and intramural grants from the Korea National Institute of Health (2019-NG-053-02).

### **Korea National Diabetes Program (KNDP)**

The KNDP gratefully acknowledges the contributions of the participants and of the study staff. This study was supported by a grant from the Korea Healthcare Technology R&D Project, Ministry of Health and Welfare, Republic of Korea (A102065).

### **Kuwait Obesity and Diabetes Genetics Programme (KODGP)**

The KODGP gratefully acknowledges the contributions of the participants and of the study staff. The KODGP was supported by institutional funding by Kuwait Foundation for Advancements of Sciences.

### **LBR (Leicester BioResource)**

C.P.N is funded by the BHF (SP/16/4/32697). C.P.N., P.S.B. and N.J.S. are supported by the National Institute for Health Research (NIHR) Leicester Cardiovascular Biomedical Research Centre (BRC-1215-20010).

### **LIFE-Adult**

We thank all participants of the LIFE-Adult study for spending their time and blood samples. LIFE-Adult genotyping was performed at the Cologne Center for Genomics (CCG, University of Cologne, Peter Nuernberg and Mohammad R. Toliat). For genotype imputation, compute infrastructure provided by ScaDS (Dresden/Leipzig Competence Center for Scalable Data Services and Solutions) at the Leipzig University Computing Centre was used. LIFE-Adult is funded by the Leipzig Research Center for Civilization Diseases (LIFE). LIFE is an organizational unit affiliated to the Medical Faculty of the University of Leipzig. LIFE is funded by means of the European Union, by the European Regional Development Fund (ERDF) and by funds of the Free State of Saxony within the framework of the excellence initiative.

### **Lifelines Cohort Study**

The authors wish to acknowledge the services of the Lifelines Cohort Study, the contributing research centers delivering data to Lifelines, and all the study participants. The Lifelines Biobank initiative has been made possible by funding from the Dutch Ministry of Health, Welfare and Sport, the Dutch Ministry of Economic Affairs, the University Medical Center Groningen (UMCG the Netherlands), University of Groningen and the Northern Provinces of the Netherlands. The generation and management of GWAS genotype data for the Lifelines Cohort Study is supported by the UMCG Genetics Lifelines Initiative (UGLI). UGLI is partly supported by a Spinoza Grant from NWO, awarded to Cisca Wijmenga.

### **Living Biobank**

The Living Biobank was supported by grants from the Ministry of Health, Singapore, the National University of Singapore and the National University Health System, Singapore. In addition, genotyping for Living Biobank was funded by the Agency for Science, Technology and Research, Singapore, and Merck Sharp & Dohme Corp., Whitehouse Station, NJ, USA.

### **London Life Sciences Prospective Population Study (LOLIPOP)**

The LOLIPOP study is supported by the National Institute for Health Research (NIHR) Comprehensive Biomedical Research Centre Imperial College Healthcare NHS Trust. We acknowledge support of the MRC-PHE Centre for Environment and Health, and the NIHR Health Protection Research Unit on Health Impact of Environmental Hazards. The work was carried out in part at the NIHR/Wellcome Trust Imperial Clinical Research Facility. The views expressed are those of the author(s) and not necessarily those of the Imperial College Healthcare NHS Trust, the NHS, the NIHR or the Department of Health. We thank the participants and research staff who made the study possible. The LOLIPOP was funded by the British Heart Foundation (SP/04/002), the Medical Research Council (G0601966, G0700931), the Wellcome Trust (084723/Z/08/Z, 090532 & 098381) the NIHR (RP-PG-0407-10371), the NIHR Official Development Assistance (ODA, award 16/136/68), the European Union FP7 (EpiMigrant, 279143) and H2020 programs (iHealth-T2D, 643774). JC is supported by the Singapore Ministry of Health's National Medical Research Council under its Singapore Translational Research Investigator (STaR) Award (NMRC/STaR/0028/2017).

### **Long Life Family Study (LLFS)**

LLFS acknowledges the contributions of the participants and of the study staff. LLFS was funded by NIA grants U01AG023746, U01AG023712, U01AG023749, U01AG023755, U01AG023744, and U19AG063893.

### **LURIC**

We thank the LURIC study team who were either temporarily or permanently involved in patient recruitment as well as sample and data handling, in addition to the laboratory staff at the Ludwigshafen General Hospital and the Universities of Freiburg, Ulm, and Heidelberg, Germany. LURIC was supported by the 7th Framework Program RiskyCAD (grant agreement number 305739) of the European Union and the H2020 Program TO\_AITION (grant agreement number 848146) of the European Union. The work of G.E.D. is supported by the European Union's Horizon 2020 research and innovation programme under the ERA-Net Cofund action N° 727565 (OCTOPUS project) and the German Ministry of Education and Research (grant number 01EA1801A).

### **Maywood Cohort**

Maywood cohort study was supported by NIH grants R37-HL045508, R01-HL074166, R01-HL086718 and R01-HG003054.

### **MESA (Multi-Ethnic Study of Atherosclerosis)**

MESA and the MESA SHARe projects are conducted and supported by the National Heart, Lung, and Blood Institute (NHLBI) in collaboration with MESA investigators. Support for MESA is provided by contracts 75N92020D00001, HHSN268201500003I, N01-HC-95159, 75N92020D00005, N01-HC-95160, 75N92020D00002, N01-HC-95161, 75N92020D00003, N01-HC-95162, 75N92020D00006, N01-HC-95163, 75N92020D00004, N01-HC-95164, 75N92020D00007, N01-HC-95165, N01-HC-95166, N01-HC-95167, N01-HC-95168, N01-HC-95169, UL1-TR-000040, UL1-TR-001079, and UL1-TR-001420. Funding for SHARe genotyping was provided by NHLBI Contract N02-HL-64278. Genotyping was performed at Affymetrix (Santa Clara, California, USA) and the Broad Institute of Harvard and MIT (Boston, Massachusetts, USA) using the Affymetrix Genome-Wide Human SNP Array 6.0. Also supported in part by the National Center for Advancing Translational Sciences, CTSI grant UL1TR001881, and the National Institute of Diabetes and Digestive and Kidney Disease Diabetes Research Center (DRC) grant DK063491 to the Southern California Diabetes Endocrinology Research Center.

### **Metabolic Syndrome in Men (METSIM)**

The METSIM study was funded by the Academy of Finland (grant no.77299 and 124243)

### **Mexican hypertriglyceridemia (MexTG)**

The MexTG cohort gratefully acknowledges the contributions of the participants of the study staff. The MexTG cohort was funded by NIH grant R01 HL095056.

### **Mexican-American Coronary Artery Disease (MACAD) Study**

This research was supported in part by the Mexican-American Coronary Artery Disease (MACAD) National Heart, Lung, and Blood Institute, contracts R01-HL088457, R01-HL-60030.

### **Mexico City 1 and Mexico City 2 (MC1 & MC2)**

MC1 & MC2 gratefully acknowledge the contributions of the participants. We thank Miguel Alexander Vazquez Moreno, Daniel Locia and Araceli Méndez Padrón for technical support in Mexico. The Mexico City 1 and Mexico City 2 studies were supported in Mexico by the Fondo Sectorial de Investigación en Salud y Seguridad Social (SSA/IMSS/ISSSTECONACYT, project 150352), Temas Prioritarios de Salud Instituto Mexicano del Seguro Social (2014-FIS/IMSS/PROT/PRI0/14/34), and the Fundación IMSS. In Canada, this research was enabled in part by two CIHR Operating grants to EJP, a CIHR New Investigator Award to EJP and by support provided by Compute Ontario ([www.computeontario.ca](http://www.computeontario.ca)), and Compute Canada ([www.compute.canada.ca](http://www.compute.canada.ca)).

### **MGH Cardiology and Metabolic Patient Cohort (CAMP)**

The MGH Cardiology and Metabolic Patient Cohort is comprised of 3850 subjects recruited from the ambulatory MGH Cardiology Practice between 2009 and 2012. Dr. Lubitz is supported by NIH grants 1R01HL139731 and R01HL157635, and American Heart Association 18SFRN34250007. Dr. Ellinor is supported by the Fondation Leducq (14CVD01), the NIH (1R01HL092577, R01HL157635, K24HL105780) and the American Heart Association (18SFRN34110082).

### **MGH\_AF**

Dr. Ellinor is supported by the Fondation Leducq (14CVD01), the NIH (1R01HL092577, R01HL157635, and K24HL105780) and the American Heart Association (18SFRN34110082).

### **MGH Stroke**

Dr. Lubitz is supported by NIH grants 1R01HL139731 and R01HL157635, and American Heart Association 18SFRN34250007.

### **Minnesota Center for Twin and Family Research (MCTFR)**

Work conducted within the MCTFR was supported by grants from the National Institutes of Health DA044283, DA042755, DA037904, AA009367, DA005147, and DA036216.

### **Montreal Heart Institute Biobank (MHIBB)**

We thank all participants and staff of the André and France Desmarais MHI Biobank. The MHIBB was funded by the Montreal Heart Institute Foundation. Jean-Claude Tardif is the director of MHIBB and holds the Canada Research Chair in personalized and translational medicine. GL funded by the Canadian Institutes of Health Research (PJT #156248), the Canada Research Chair Program, Genome Quebec and Genome Canada, and the Montreal Heart Institute Foundation.

### **MPP-AF, MPP-echo**

J. Gustav Smith was supported by grants from the Swedish Heart-Lung Foundation (2019-0526), the Swedish Research Council (2017-02554), the European Research Council (ERC-STG-2015-679242), Skåne University Hospital, governmental funding of clinical research within the Swedish National Health Service, a generous donation from the Knut and Alice Wallenberg foundation to the Wallenberg Center for Molecular Medicine in Lund, and funding from the Swedish Research Council (Linnaeus grant Dnr 349-2006-237, Strategic Research Area Exodiab Dnr 2009-1039) and Swedish Foundation for Strategic Research (Dnr IRC15-0067) to the Lund University Diabetes Center.

### **MrOS Gothenburg**

MrOS in Sweden is supported by the Swedish Research Council, the Swedish Foundation for Strategic Research, the ALF/LUA research grant in Gothenburg, the Lundberg Foundation, the Knut and Alice Wallenberg Foundation, the Torsten Soderberg Foundation, and the Novo Nordisk Foundation.

**Multiethnic cohort - African American Breast Cancer (MEC-AABC); Multiethnic cohort - African American Prostate Cancer (MEC-AAPC); Multiethnic cohort - Latina American Breast Cancer (MEC-LABC); Multiethnic cohort - Latino American Prostate Cancer (MEC-LAPC)**

The Multiethnic Cohort (MEC) is a population-based prospective cohort study including approximately 215,000 men and women from Hawaii and California. All participants were 45-75 years of age at baseline, and primarily of 5 ancestries: Japanese Americans, African Americans, European Americans, Hispanic/Latinos, and Native Hawaiians. (PMIDs: 10695593; 23449381) MEC was funded by the National Cancer Institute in 1993 to examine lifestyle risk factors and genetic susceptibility to cancer. All eligible cohort members completed baseline and follow-up questionnaires.

**Myocardial Infarction Genetics Consortium (MIGEN)**

Funding support was provided by grants 1K08HG010155 and 1U01HG011719 (to A.V.K.) from the National Human Genome Research Institute

**NAFLD study (NAFLD)**

The NAFLD study is partially supported by "Research Project For Excellence IKY/SIEMENS". O.G. received funding from the British Heart Foundation (BHF) (FS/14/66/3129).

**The Nagahama study**

We are extremely grateful to the Nagahama City Office and the nonprofit organization Zeroji Club for their help in performing the Nagahama study. The work was supported by a university grant, the Center of Innovation Program, the Global University Project from the Ministry of Education, Culture, Sports, Science and Technology of Japan; the Practical Research Project for Rare/Intractable Diseases (ek0109070, ek0109283, ek0109196, ek0109348), and the Program for an Integrated Database of Clinical and Genomic Information (kk0205008), from the Japan Agency for Medical Research and Development (AMED), Takeda Medical Research Foundation.

**National Survey of Health and Development (NSHD)**

We thank the NSHD participants for their continued support and lifelong contribution to the study. The NSHD is funded by the UKRI Medical Research Council [MC\_UU\_00019/1].

**NESCOG**

NESCOG research was part of Science Live, the innovative research program of science center NEMO that enables scientists to carry out their research using NEMO visitors as volunteers. The Netherlands Organization for Scientific Research (NWO) Division for the Social Sciences (MaGW) provided funding for this research through VIDI 016-065-318 to D.P.

**Netherlands Epidemiology of Obesity Study (NEO)**

We greatly appreciate all participants of the Netherlands Epidemiology of Obesity study, and all participating general practitioners for inviting eligible individuals. We furthermore thank P.R. van Beelen and all research nurses for collecting the data, P.J. Noordijk and her team for sample handling and storage and I. de Jonge, MSc for all data management of the NEO study. The NEO study is supported by the participating Departments, the Division and the Board of Directors of the Leiden University Medical Centre, and by the Leiden University, Research Profile Area 'Vascular and Regenerative Medicine.

**The Netherlands Study of Depression and Anxiety (NESDA)**

For NESDA, funding was obtained from the Netherlands Organization for Scientific Research (Geestkracht program grant 10-000-1002); the Center for Medical Systems Biology (CSMB, NWO



Genomics), Biobanking and Biomolecular Resources Research Infrastructure (BBMRI-NL), VU University's Institutes for Health and Care Research (EMGO+) and Neuroscience Campus Amsterdam, University Medical Center Groningen, Leiden University Medical Center, National Institutes of Health (NIH, R01D0042157-01A, MH081802, Grand Opportunity grants 1RC2 MH089951 and 1RC2 MH089995). Part of the genotyping and analyses were funded by the Genetic Association Information Network (GAIN) of the Foundation for the National Institutes of Health. Computing was supported by BiG Grid, the Dutch e-Science Grid, which is financially supported by NWO.

### **The Netherlands Twin Register (NTR)**

We thank all twins and family members for their participation. We also thank SURFsara for the support in using the Lisa Compute Cluster. See also: <http://www.tweelingenregister.vu.nl/> for more information. Studies were approved by the Central Ethics Committee on Research Involving Human Subjects of the VU University Medical Centre, Amsterdam, an Institutional Review Board certified by the U.S. Office of Human Research Protections (IRB number IRB00002991 under Federal-wide Assurance- FWA00017598; IRB/institute codes, NTR 03-180). The Netherlands Twin Register acknowledges funding from the Netherlands Organization for Scientific research (NWO), including NWO-Grants NWO/SPI 56-464-14192 and 480-15-001/674: Netherlands Twin Registry Repository and the Biobanking and Biomolecular Resources Research Infrastructure (BBMRI-NL, 184.021.007 and 184.033.111); Amsterdam Public Health (APH) and Neuroscience Campus Amsterdam (NCA); the European Community 7th Framework Program (FP7/2007-2013): ENGAGE (HEALTH-F4-2007-201413) and ACTION (9602768) and European Research Council (ERC-230374). We also acknowledge The Rutgers University Cell and DNA Repository cooperative agreement (NIMH U24 MH068457-06); the Collaborative Study of the Genetics of DZ twinning (NIH R01D0042157-01A1); the Developmental Study of Attention Problems in Young Twins (NIMH, R01 MH58799-03); Major depression: stage 1 genome-wide association in population-based samples (MH081802); Determinants of Adolescent Exercise Behavior (NIDDK R01 DK092127-04); Grand Opportunity grants Integration of Genomics and Transcriptomics (NIMH 1RC2MH089951-01) and Developmental Trajectories of Psychopathology (NIMH 1RC2 MH089995); and the Avera Institute for Human Genetics, Sioux Falls, South Dakota (USA). DIB acknowledges her KNAW Academy Professor Award (PAH/6635).

### **Nigeria Cohort**

The authors acknowledge the assistance of the research staff and participants in Igbo-Ora, Oyo State, Nigeria. Nigerian cohort study was supported by NIH grants R37-HL045508, R01-HL053353, R01-DK075787 and U01-HL054512.

### **Nijmegen Biomedical Study (NBS)**

The Nijmegen Biomedical Study is a population-based survey conducted at the Department for Health Evidence and the Department of Laboratory Medicine of the Radboud university medical center. Principal investigators of the Nijmegen Biomedical Study are L.A.L.M. Kiemeny, A.L.M. Verbeek, D.W. Swinkels en B. Franke.

### **Northern Finland Birth cohort 1966 (NFBC1966)**

The authors are grateful to the late professor Paula Rantakallio (launch of NFBC1966), the participants in the 31- and 46-years-old study and the NFBC project center ([www oulu.fi/nfbc](http://www oulu.fi/nfbc)). We thank all cohort members and researchers who participated in the 46 yrs study. We also wish acknowledge the work of the NFBC project center. NFBC1966 received financial support from University of Oulu Grant no. 24000692, Oulu University Hospital Grant no. 24301140, ERDF European Regional Development Fund Grant no. 539/2010 A31592, Academy of Finland ( 285547, EGEA).

### **Northern Ireland Cohort for Longitudinal Study of Ageing (NICOLA)**

We are grateful to all the participants of the NICOLA Study, and the whole NICOLA team, which includes nursing staff, research scientists, clerical staff, computer and laboratory technicians, managers and receptionists. The authors alone are responsible for the interpretation of the data and any views or

opinions presented are solely those of the authors and do not necessarily represent those of the NICOLA Study team. Support for the study came from The Atlantic Philanthropies, the Economic and Social Research Council, the UKCRC Centre of Excellence for Public Health Northern Ireland, the Centre for Ageing Research and Development in Ireland, the Office of the First Minister and Deputy First Minister, the Health and Social Care Research and Development Division of the Public Health Agency, the Wellcome Trust/Wolfson Foundation and Queen's University Belfast provide core financial support for NICOLA. The analysis of molecular biomarkers for NICOLA's Wave 1 was funded by the Economic and Social Research Council, award reference ES/L008459/1. Generic analysis of data was supported by ESRC (ES/L008459/1) and the Science Foundation Ireland-Department for the Economy (SFI-DfE) Investigator Program Partnership Award (15/IA/3152). LJS is supported by an award from NI HSC R&D division STL/5569/19; UKRI (Medical Research Council) MC\_PC\_20026.

### **Nurses' Health Study (NHS)**

The authors would like to thank the participants and staff of the Nurses Health Study for their valuable contributions. The Nurses' Health Study was supported by NIH grants UM1 CA186107, P01 CA87969 and R01 CA49449.

### **Nurses' Health Study II (NHS II)**

The authors would like to thank the participants and staff of the Nurses' Health Study II for their valuable contributions. The Nurses' Health Study II was supported by NIH Grants U01 CA176726 and R01 CA67262.

### **Oglastra Genetic Park (OGP)**

The OGP expresses its gratitude to all the study participants for their contributions and to the municipal administrations for their economic and logistic support. The OGP study was supported by grant from the Italian Ministry of Education, University and Research (MIUR) n°: 5571/DSPAR/2002.

### **Orkney Complex Disease Study (ORCADES)**

DNA extractions were performed at the Edinburgh Clinical Research Facility, University of Edinburgh. We would like to acknowledge the invaluable contributions of the research nurses in Orkney, the administrative team in Edinburgh and the people of Orkney. PRHJT acknowledges funding from the Medical Research Council Doctoral Training Programme in Precision Medicine (MR/N013166/1). The Orkney Complex Disease Study (ORCADES) was supported by the Chief Scientist Office of the Scottish Government (CZB/4/276, CZB/4/710), a Royal Society URF to J.F.W., the MRC Human Genetics Unit quinquennial programme "QTL in Health and Disease", Arthritis Research UK and the European Union framework program 6 EUROSPAN project (contract no. LSHG-CT-2006-018947).

### **Oxford Biobank**

This research was funded by the National Institute for Health Research Oxford Biomedical Research Centre and the British Heart Foundation [RG/17/1/32663].

### **Penn Medicine Biobank (PMBB)**

The PMBB gratefully acknowledges the contributions of the participants and of the study staff. The Penn Medicine BioBank is funded by a gift from the Smilow family, the National Center for Advancing Translational Sciences of the National Institutes of Health under CTSA Award Number UL1TR001878, and the Perelman School of Medicine at the University of Pennsylvania. SMD is supported by IK2-CX001780. This publication does not represent the views of the Department of Veterans Affairs or the United States Government.

### **Physicians Health Study (PHS)**

We are grateful to the participants and staff of the Physicians' Health Study for their valuable contributions. The Physicians Health Study was supported by grant CA141298.

### **Precocious Coronary Artery Disease (PROCARDIS)**

PROCARDIS was supported by the European Community Sixth Framework Program (LSHM-CT-2007-037273), AstraZeneca, the Swedish Research Council, the Knut and Alice Wallenberg Foundation, the Swedish Heart-Lung Foundation, the Torsten and Ragnar Soderberg Foundation, the Strategic Cardiovascular Program of Karolinska Institutet and Stockholm County Council, the Foundation for Strategic Research and the Stockholm County Council (560283). Wellcome Trust core award (090532/Z/09/Z, 203141/Z/16/Z, 201543/B/16/Z); HEALTH-F2-2013-601456 (CVGenes@Target), the TriPartite Immunometabolism Consortium [TrIC]-Novo Nordisk Foundation's Grant number NNF15CC0018486, VIAgenomics (SP/19/2/344612) and support from the NIHR Oxford Biomedical Research Centre. The views expressed are those of the author(s) and not necessarily those of the NHS, the NIHR or the Department of Health. HW is supported by the British Heart Foundation Centre for Research Excellence. Maria Sabater-Lleal is supported by a Miguel Servet contract from the ISCIII Spanish Health Institute (CP17/00142) and co-financed by the European Social Fund.

### **PROMIS**

AVK was funded by NHGRI 1K08HG010155. GH was funded by the Swedish Research Council grant 2016-06830.

### **PROspective Study of Pravastatin in the Elderly at Risk for vascular disease (PROSPER)**

The PROSPER study was supported by an investigator initiated grant obtained from Bristol-Myers Squibb. Prof. Dr. J. W. Jukema is an Established Clinical Investigator of the Netherlands Heart Foundation (grant 2001 D 032). Support for genotyping was provided by the seventh framework program of the European commission (grant 223004) and by the Netherlands Genomics Initiative (Netherlands Consortium for Healthy Aging grant 050-060-810).

### **The Prostate Cancer Association Group to Investigate Cancer Associated Alterations in the Genome (PRACTICAL) Consortium**

#### Funding & Acknowledgements

Genotyping of the OncoArray was funded by the US National Institutes of Health (NIH) [U19 CA 148537 for ELucidating Loci Involved in Prostate cancer SuscEptibility (ELLIPSE) project and X01HG007492 to the Center for Inherited Disease Research (CIDR) under contract number HHSN268201200008I]. Additional analytic support was provided by NIH NCI U01 CA188392 (PI: Schumacher).

The PRACTICAL consortium was supported by Cancer Research UK Grants C5047/A7357, C1287/A10118, C1287/A16563, C5047/A3354, C5047/A10692, C16913/A6135, European Commission's Seventh Framework Programme grant agreement n° 223175 (HEALTH-F2-2009-223175), and The National Institute of Health (NIH) Cancer Post-Cancer GWAS initiative grant: No. 1 U19 CA 148537-01 (the GAME-ON initiative).

We would also like to thank the following for funding support: The Institute of Cancer Research and The Everyman Campaign, The Prostate Cancer Research Foundation, Prostate Research Campaign UK (now PCUK), The Orchid Cancer Appeal, Rosetrees Trust, The National Cancer Research Network UK, The National Cancer Research Institute (NCRI) UK. We are grateful for support of NIHR funding to the NIHR Biomedical Research Centre at The Institute of Cancer Research and The Royal Marsden NHS Foundation Trust.

This study would not have been possible without the contributions of the following:

Coordination team, bioinformatician and genotyping centres:

Genotyping at CCGE, Cambridge: Caroline Baines and Don Conroy

Additional funding and acknowledgments from studies in PRACTICAL:

Information of the PRACTICAL consortium can be found at

<http://practical.icr.ac.uk/>

## Acknowledgments for studies contributing to PRACTICAL Consortium

### AHS

This work was supported by the Intramural Research Program of the NIH, National Cancer Institute, Division of Cancer Epidemiology and Genetics (Z01CP010119).

### ATBC

The ATBC Study is supported by the Intramural Research Program of the U.S. National Cancer Institute, National Institutes of Health, Department of Health and Human Services.

### APCB

The Australian Prostate Cancer BioResource (APCB) was supported by The National Health and Medical Research Council, Enabling Grant [614296] and the Prostate Cancer Foundation of Australia.

The Australian Prostate Cancer BioResource (APCB) would like to acknowledge and sincerely thank the urologists, pathologists, coordinators, data managers, nurses and patient participants who have generously and altruistically supported the APCB.

### CCI

This work was awarded by Prostate Cancer Canada and is proudly funded by the Movember Foundation - Grant # D2013-36.

The CCI group would like to thank David Murray, Razmik Mirzayans, and April Scott for their contribution to this work.

### CeRePP

### COH

SLN is partially supported by the Morris and Horowitz Families Endowed Professorship

### COSM

COSM is funded by The Swedish Research Council (grant for the Swedish Infrastructure for Medical Population-based Life-course Environmental Research – SIMPLER), the Swedish Cancer Foundation.

### EPICAP

The EPICAP study was supported by grants from Ligue Nationale Contre le Cancer; Institut National du Cancer (INCa); Fondation ARC; Fondation de France; Agence Nationale de sécurité sanitaire de l'alimentation, de l'environnement et du travail (ANSES); Ligue départementale du Val de Marne.

The EPICAP study group would like to thank all urologists, Antoinette Anger and Hasina Randrianasolo (study monitors), Anne-Laure Astolfi, Coline Bernard, Oriane Noyer, Marie-Hélène De Campo, Sandrine Margaroline, Louise N'Diaye, Sabine Perrier-Bonnet (Clinical Research nurses)

### ESTHER

The ESTHER study was supported by a grant from the Baden Württemberg Ministry of Science, Research and Arts.

The ESTHER group would like to thank Hartwig Ziegler, Sonja Wolf, Volker Hermann, Heiko Müller, Karina Dieffenbach, Katja Butterbach for valuable contributions to the study.

### FHCRC

The FHCRC studies were supported by grants R01-CA080122, R01-CA056678, R01-CA082664, and R01-CA092579, and K05-CA175147 from the US National Cancer Institute, National Institutes of Health, with additional support from the Fred Hutchinson Cancer Research Center (P30-CA015704).

We thank all the individuals who participated in these studies.

### Hamburg-Zagreb

## IMPACT

The IMPACT study was funded by The Ronald and Rita McAulay Foundation, CR-UK Project grant (C5047/A1232), Cancer Australia, AICR Netherlands A10-0227, Cancer Australia and Cancer Council Tasmania, NIHR, EU Framework 6, Cancer Councils of Victoria and South Australia, Philanthropic donation to Northshore University Health System.

We acknowledge support from the National Institute for Health Research (NIHR) to the Biomedical Research Centre at The Institute of Cancer Research and Royal Marsden Foundation NHS Trust.

We acknowledge the IMPACT study steering committee, collaborating centres and participants.

## KULEUVEN

F.C. and S.J. are holders of grants from FWO Vlaanderen (G.0684.12N and G.0830.13N), the Belgian federal government (National Cancer Plan KPC\_29\_023), and a Concerted Research Action of the KU Leuven (GOA/15/017). TVDB is holder of a doctoral fellowship of the FWO.

## MCC-Spain

"The study was partially funded by the ""Accion Transversal del Cancer"", approved on the Spanish Ministry Council on the 11th October 2007, by the Instituto de Salud Carlos III-FEDER (PI08/1770, PI09/00773-Cantabria, PI11/01889-FEDER, PI12/00265, PI12/01270, PI12/00715, PI15/00069), by the Fundació Marqués de Valdecilla (API 10/09), by the Spanish Association Against Cancer (AECC) Scientific Foundation and by the Catalan Government DURSI grant 2009SGR1489. Samples: Biological samples were stored at the Parc de Salut MAR Biobank (MARBiobanc; Barcelona) which is supported by Instituto de Salud Carlos III FEDER (RD09/0076/00036). Also sample collection was supported by the Xarxa de Bancs de Tumors de Catalunya sponsored by Pla Director d'Oncologia de Catalunya (XBTC). ISGlobal acknowledges support from the Spanish Ministry of Science and Innovation through the "Centro de Excelencia Severo Ochoa 2019-2023" Program (CEX2018-000806-S), and support from the Generalitat de Catalunya through the CERCA Program."

We acknowledge the contribution from Esther Gracia-Lavedan in preparing the data. We thank all the subjects who participated in the study and all MCC-Spain collaborators.

## MCCS

Melbourne Collaborative Cohort Study (MCCS) cohort recruitment was funded by VicHealth and Cancer Council Victoria. The MCCS was further augmented by Australian National Health and Medical Research Council grants 209057, 396414 and 1074383 and by infrastructure provided by Cancer Council Victoria. Cases and their vital status were ascertained through the Victorian Cancer Registry and the Australian Institute of Health and Welfare, including the National Death Index and the Australian Cancer Database.

## MEC

The MEC was supported by NIH grants CA063464, CA054281, CA098758, and CA164973.

## MOFFITT

The Moffitt group was supported by the US National Cancer Institute (R01CA128813, PI: J.Y. Park).

## PLCO

This PLCO study was supported by the Intramural Research Program of the Division of Cancer Epidemiology and Genetics, National Cancer Institute, NIH

The authors thank Drs. Christine Berg and Philip Prorok, Division of Cancer Prevention at the National Cancer Institute, the screening center investigators and staff of the PLCO Cancer Screening Trial for their contributions to the PLCO Cancer Screening Trial. We thank Mr. Thomas Riley, Mr. Craig Williams, Mr. Matthew Moore, and Ms. Shannon Merkle at Information Management Services, Inc., for their management of the data and Ms. Barbara O'Brien and staff at Westat, Inc. for their contributions to the

PLCO Cancer Screening Trial. We also thank the PLCO study participants for their contributions to making this study possible.

#### PRAGGA

PRAGGA was supported by Programa Grupos Emergentes, Cancer Genetics Unit, CHUVI Vigo Hospital, Instituto de Salud Carlos III, Spain.

PRAGGA wishes to thank Victor Muñoz Garzón, Manuel Enguix Castelo, Sara Miranda Ponte, Carmen M Redondo, Manuel Calaza, Francisco Gude Sampedro, Joaquín González-Carreró and the staff of the Department of Pathology and Biobank of University Hospital Complex of Vigo, Instituto de Investigación Sanitaria Galicia Sur (IISGS), SERGAS, Vigo, Spain; Máximo Fraga, José Antúnez and the Biobank of University Hospital Complex of Santiago, Santiago de Compostela, Spain; and Maria Torres, Angel Carracedo and the Galician Foundation of Genomic Medicine.

#### PROFILE

We would like to acknowledge the support of the Ronald and Rita McAulay Foundation and Cancer Research UK. We also acknowledge support from the National Institute for Health Research (NIHR) to the Biomedical Research Centre at The Institute of Cancer Research and Royal Marsden Foundation NHS Trust

We acknowledge the Profile study steering committee and participants.

#### QLD

The QLD research is supported by The National Health and Medical Research Council (NHMRC) Australia Project Grants [390130, 1009458] and NHMRC Career Development Fellowship, Cancer Australia PdCCRS and Cancer Council Queensland funding to J Batra

The QLD team would like to acknowledge and sincerely thank the urologists, pathologists, data managers and patient participants who have generously and altruistically supported the QLD cohort.

#### SEARCH

SEARCH is funded by a programme grant from Cancer Research UK [C490/A10124] and supported by the UK National Institute for Health Research Biomedical Research Centre at the University of Cambridge. The University of Cambridge has received salary support in respect of PP from the NHS in the East of England through the Clinical Academic Reserve.

#### SFPCS

SFPCS was funded by California Cancer Research Fund grant 99-00527V-10182

#### SWOG-PCPT / SWOG-SELECT

SELECT and PCPT are funded by Public Health Service grants U10CA37429 and 5UM1CA182883 from the National Cancer Institute.

The authors thank the site investigators and staff and, most importantly, the participants from PCPT who donated their time to this trial.

#### Toronto

Prostate Cancer Canada Movember Discovery Grant (D2013-17) to RJH; Canadian Cancer Society Research Institute Career Development Award in Cancer Prevention (2013-702108) to RJH

#### UKGPCS

UKGPCS would also like to thank the following for funding support: The Institute of Cancer Research and The Everyman Campaign, The Prostate Cancer Research Foundation, Prostate Research Campaign UK (now Prostate Action), The Orchid Cancer Appeal, The National Cancer Research Network UK, The National Cancer Research Institute (NCRI) UK. We are grateful for support of NIHR funding to the NIHR Biomedical Research Centre at The Institute of Cancer Research and The Royal Marsden NHS

Foundation Trust. UKGPCS should also like to acknowledge the NCRN nurses, data managers and Consultants for their work in the UKGPCS.

UKGPCS would like to thank all urologists and other persons involved in the planning, coordination, and data collection of the study. KM and AL were in part supported from the NIHR Manchester Biomedical Research Centre

### ULM

The Ulm group received funds from the German Cancer Aid (Deutsche Krebshilfe).

### WUGS

WUGS would like to thank the following for funding support: The Anthony DeNovi Fund, the Donald C. McGraw Foundation, and the St. Louis Men's Group Against Cancer.

Information about the PRACTICAL consortium can be found at <http://practical.icr.ac.uk/>. The PRACTICAL consortium investigators are: Rosalind A. Eeles, Zsafia Kote-Jarai, Kenneth R. Muir, UKGPCS collaborators, Artitaya Lophatananon, Catherine M. Tangen, Phyllis J. Goodman, Ian M. Thompson Jr., Alicja Wolk, Niclas Håkansson, Demetrius Albanes, Stephanie Weinstein, Nora Pashayan, Alison M. Dunning, Maya Ghousaini, Jyotsna Batra, APCR BioResource (Australian Prostate Cancer BioResource), Suzanne Chambers, Judith A. Clements, Lisa Horvath, Leire Moya, Gail P. Risbridger, Wayne Tilley, Sonja I. Berndt, Stephen Chanock, Gerald L. Andriole, Robert N. Hoover, Mitchell J. Machiela, Stella Koutros, Laura E. Beane Freeman, Florence Menegaux, Thérèse Truong, Christopher A. Haiman, Fredrick R. Schumacher, Loic Le Marchand, Xin Sheng, Robert J. MacInnis, Melissa C. Southey, Graham G. Giles, Roger L. Milne, Robert J. Hamilton, Neil E. Fleshner, Antonio Finelli, Manolis Kogevinas, Javier Llorca, Gemma Castaño-Vinyals, Antonio Alcaraz, Olivier Cussenot, Géraldine Cancel-Tassin, The IMPACT Study Steering Committee and Collaborators, Janet L. Stanford, Elaine A. Ostrander, Adam S. Kibel, Bettina F. Drake, Hermann Brenner, Xin Gao, Bernd Holleczek, Ben Schöttker, Esther M. John, Jong Y. Park, Hui-Yi Lin, Nawaid Usmani, Matthew Parliament, Aswin Abraham, Susan L. Neuhausen, Yuan Chun Ding, Linda Steele, Jose Esteban Castela, Manuela Gago-Dominguez, Maria Elena Martinez, Frank Claessens, Steven Joniau, Thomas Van den Broeck, Christiane Maier, Manuel Luedeke, Thomas Schnoeller, Marija Gamulin, Davor Lessel, Tomislav Kulis, The Profile Study Steering Committee.

### **Prostate cancer Genome-wide Association Study to Uncover Susceptibility loci (PEGASUS)**

PEGASUS gratefully acknowledges contributions of the study participants. The content of this publication does not necessarily reflect the views or policies of the Department of Health and Human Services nor does mention of trade names, commercial products, or organization indicate endorsement by the U.S. Government. PEGASUS was supported by the Intramural Research Program of the Division of Cancer Epidemiology and Genetics, National Cancer Institute, NIH (ZIA CP010152-20).

### **Pune maternal Nutrition Study (PMNS)**

The PMNS gratefully acknowledges the contributions of the participants and of the study staff. Investigator support from the Council of Scientific and Industrial Research, Ministry of Science and Technology, Govt. of India, New delhi, India.

### **QIMR**

QIMR gratefully acknowledges the contributions of the participants and their families. QIMR gratefully acknowledges funding from the Australian National Health and Medical Research Council (NHMRC; 241944, 389875, 389891, 389892, 389938, 442915, 442981, 496739, 496688, 552485, 613672, 613601, 1011506 and APP1172917), the US National Institutes of Health (AA07535, AA10248, AA014041, AA13320, AA13321, AA13326 and DA12854) and the Australian Research Council (ARC; DP0770096 and DP1093502). SEM was supported by NHMRC Investigator Grant APP1172917.

### **Quebec Family Study (QFS)**

Thanks are expressed to the participants in the Québec Family Study and the staff of the Physical Activity Sciences Laboratory at Université Laval for their contribution in this study. The Quebec Family Study was funded by multiple grants from the Medical Research Council of Canada and the Canadian Institutes of Health Research. This work was supported by a team grant from the Canadian Institutes of Health Research (FRN-CCT-83028).

### **Ragama Health Study (RHS)**

The RHS was supported by a Grant from the National Center for Global Health and Medicine (NCGM).

### **The Raine Study**

The authors are grateful to the Raine Study participants and their families, and to the Raine Study team for cohort coordination and data collection. The authors gratefully acknowledge the NHMRC for their long-term funding to the study over the last 30 years and also the following institutes for providing funding for Core Management of the Raine Study: The University of Western Australia (UWA), Curtin University, Women and Infants Research Foundation, Telethon Kids Institute, Edith Cowan University, Murdoch University, The University of Notre Dame Australia and The Raine Medical Research Foundation. This work was supported by resources provided by the Pawsey Supercomputing Centre with funding from the Australian Government and Government of Western Australia. The Raine Study was supported by the National Health and Medical Research Council of Australia [grant numbers 572613, 403981, 1059711, 1027449, 1044840, 1021858], the Canadian Institutes of Health Research [grant number MOP-82893], and WA Health, Government of Western Australia (WADOH) [Future Health WA G06302]. Funding was also generously provided by Safe Work Australia.

### **Relationship between Insulin Sensitivity and Cardiovascular disease Study (RISC)**

The RISC Study was supported by European Union grant QLGI-CT-2001-01252 and AstraZeneca.

### **The Religious Orders Study and the Rush Memory and Aging Project batch 1 (ROSMAP1)**

The ROSMAP are grateful to the participants of the studies, and the faculty and staff of the Rush Alzheimer's Disease Center. Funding from NIA grant P30AG10161, P30AG72975, R01AG17917, RF1AG15819, R01AG30146, U01AG46152, U01AG61256; Translational Genomics Research Institute.

### **Rotterdam Study I, II, III**

The generation and management of GWAS genotype data for the Rotterdam Study (RS I, RS II, RS III) was executed by the Human Genotyping Facility of the Genetic Laboratory of the Department of Internal Medicine, Erasmus MC, Rotterdam. We thank Pascal Arp, Mila Jhamai, Marijn Verkerk, Lizbeth Herrera and Marjolein Peters, PhD, and Carolina Medina-Gomez, PhD, for their help in creating the GWAS database and for the creation and analysis of imputed data. The GWAS datasets are supported by the Netherlands Organisation of Scientific Research NWO Investments (nr. 175.010.2005.011, 911-03-012), the Genetic Laboratory of the Department of Internal Medicine, Erasmus MC, the Research Institute for Diseases in the Elderly (014-93-015; RIDE2), the Netherlands Genomics Initiative (NGI)/Netherlands Organisation for Scientific Research (NWO) Netherlands Consortium for Healthy Aging (NCHA), project nr. 050-060-810.

### **Sardinia**

Funding support from Intramural Research Program of the NIH, National Institute on Aging, with contracts N01-AG-1-2109 and HHSN271201100005C. Sardinian Autonomous Region (L.R. no. 7/2009) grant cRP3-154. Fondazione di Sardegna (grant U1301.2015/AI.1157. BE Prat. 2015-1651).

### **SDC**

Novo Nordisk Foundation Center for Basic Metabolic Research is an independent Research Center, based at the University of Copenhagen, Denmark and partially funded by an unconditional donation from the Novo Nordisk Foundation ([www.cbmr.ku.dk](http://www.cbmr.ku.dk)) (Grant number NNF18CC0034900).



### **SEED (SCES + SiMES + SINDI)**

The Singapore Chinese Eye Study (SCES), the Singapore Malay Eye Study (SiMES), and the Singapore Indian Eye Study (SINDI) are supported by the National Medical Research Council (NMRC), Singapore (grants 0796/2003, 1176/2008, 1149/2008, STaR/0003/2008, 1249/2010, CG/SERI/2010, CIRG/1371/2013, and CIRG/1417/2015), and Biomedical Research Council (BMRC), Singapore (08/1/35/19/550 and 09/1/35/19/616).

### **Shanghai breast cancer study (SBCS)**

The generation and management of GWAS genotype data for the SBCS was supported by R01CA64277 and R01CA15847.

### **Shanghai Women's Health Study(SWHS)**

The generation and management of GWAS genotype data for the SWHS was supported by UM1CA182910 and R01CA148677.

### **Singapore Chinese Health Study - Coronary Artery Disease (SCHS CAD)**

We thank Siew-Hong Low of the National University of Singapore for supervising the field work of the Singapore Chinese Health Study and the Ministry of Health in Singapore for assistance with the identification of AMI cases via database linkages. We also acknowledge the founding, longstanding principal investigator of the Singapore Chinese Health Study, Mimi C. Yu. The Singapore Chinese Health Study (SCHS) was supported by the U.S. National Institutes of Health (Grant Numbers R01CA144034 and UM1 CA182876), and by the Singapore National Medical Research Council(Grant Number 1270/2010). Genotyping of the SCHS CAD subset was funded by the HUI-CREATE Programme of the National Research Foundation, Singapore (Project Number 370062002).

### **Singapore Chinese Health Study (SCHS-T2D)**

The Singapore Chinese Health Study was supported by U.S. NIH/NCI grants: R01 CA55069, R35 CA53890, R01 CA80205, and R01 CA144034.

### **Singapore Prospective Study Program (SP2)**

The Singapore Prospective Study Program (SP2) were supported by the individual research grant and clinician scientist award schemes from the National Medical Research Council (NMRC) and the Biomedical Research Council (BMRC) of Singapore.

### **The Slim Initiative in Genomic Medicine for the Americas (SIGMA) T2D Consortium**

Acknowledges the contribution of participants and study staff. Additional funding from SIGMA, MCDS R01 24799 NIHHLB ,CONACYT 2092,CONACYT M9303,CONACYT F677,CONACYT 251 M. J.M.Mercader is supported by American Diabetes Association Innovative and Clinical Translational Award 1-19-ICTS-068. The Mexico City Diabetes Study (part of The SIGMA consortium) has been funded by The National Heart, Lung and Blood Institutes R01 HL 2479 , and by Consejo Nacional de Ciencia y Tecnologia CONACYT grants 2092, M9303, F677M9407, 251M 2005COI.

### **SORBS**

We thank all those who participated in the study. Sincere thanks are given to Dr. Knut Krohn (University of Leipzig) for the genotyping support. This work was supported by grants from the Deutsche Forschungsgemeinschaft (DFG, German Research Foundation – Projektnummer 209933838 – SFB 1052; B03, C01; SPP 1629 TO 718/2- 1).

### **Special Turku Coronary Risk Factor Intervention Project (STRIP) parents**

We thank the study participants and their families as well as the research group who collected the data. STRIP was supported by Academy of Finland (grants 206374, 251360 and 276861); Juho Vainio Foundation; Finnish Cardiac Research Foundation; Finnish Cultural Foundation; Finnish Ministry of Education and Culture; Sigrid Juselius Foundation; Yrjö Jahnsson Foundation; C.G. Sundell Foundation;

Special Governmental Grants for Health Sciences Research, Turku University Hospital; Foundation for Pediatric Research; and Turku University Foundation.

### **SR - Silk Road**

The authors gratefully acknowledge the subjects from the SR cohort. This study is part of the scientific activities carried out within the scientific expedition Marcopolo 2010. We thank the Terramadre organization and the Terramadre communities who participated in the project. This study was funded by the Italian Ministry of Health—RC 01/21 to MPC and D70-RESRICGIROTTO to GG.

### **Study of Health in Pomerania (SHIP)**

SHIP is part of the Community Medicine Research net of the University of Greifswald, Germany, which is funded by the Federal Ministry of Education and Research (grants no. 01ZZ9603, 01ZZ0103, and 01ZZ0403), the Ministry of Cultural Affairs as well as the Social Ministry of the Federal State of Mecklenburg-West Pomerania, and the network 'Greifswald Approach to Individualized Medicine (GANI\_MED)' funded by the Federal Ministry of Education and Research (grant 03IS2061A). Genome-wide data have been supported by the Federal Ministry of Education and Research (grant no. 03ZIK012) and a joint grant from Siemens Healthineers, Erlangen, Germany and the Federal State of Mecklenburg-West Pomerania. The University of Greifswald is a member of the Caché Campus program of the InterSystems GmbH. SHIP was funded by the Federal Ministry of Education and Research grants no. 01ZZ9603, 01ZZ0103, 01ZZ0403, 03IS2061A, and 03ZIK012

### **Taiwan Type 2 Diabetes Study Consortium (TWT2D)**

The TWT2D gratefully acknowledges the contributions of the participants and of the study staff. The TWT2D was funded by Academia Sinica.

### **Taiwan U.S. Diabetic Retinopathy Study (TUDR)**

This study was supported by the National Eye Institute of the National Institutes of Health (EY014684) and ARRA Supplement (EY014684-03S1, -04S1), the National Institute of Diabetes and Digestive and Kidney Disease grant DK063491 to the Southern California Diabetes Endocrinology Research Center, the Eye Birth Defects Foundation Inc., the National Science Council, Taiwan (NSC 98-2314-B-075A-002-MY3) and the Taichung Veterans General Hospital, Taichung, Taiwan (TCVGH-1003001C).

### **The Hellenic study of Interactions between Single nucleotide polymorphisms and Eating in Atherosclerosis Susceptibility (THISEAS)**

THISEAS is partially supported by a research grant (PENED 2003) from the Greek General Secretary of Research and Technology. Work supported by the Barts Biomedical Research Centre funded by the UK National Institute for Health Research (NIHR).

### **The Rare Variants for Hypertension in Taiwan Chinese (THRV)**

The Rare Variants for Hypertension in Taiwan Chinese (THRV) is supported by the National Heart, Lung, and Blood Institute (NHLBI) grant (R01HL111249) and its participation in TOPMed is supported by an NHLBI supplement (R01HL111249-04S1). THRV is a collaborative study between Washington University in St. Louis, The Lundquist Institute at Harbor UCLA, University of Texas in Houston, Taichung Veterans General Hospital, Taipei Veterans General Hospital, Tri-Service General Hospital, National Health Research Institutes, National Taiwan University, and Baylor University. THRV is based (substantially) on the parent SAPPHiRe study, along with additional population-based and hospital-based cohorts. SAPPHiRe was supported by NHLBI grants (U01HL54527, U01HL54498) and Taiwan funds, and the other cohorts were supported by Taiwan funds.

### **Tracking Adolescents' Individual Lives Survey - Population Cohort (TRAILS Pop) and Clinical Cohort (TRAILS CC)**

We are grateful to all adolescents who participated in this research and to everyone who worked on this project and made it possible. TRAILS has been financially supported by grants from the Netherlands

Organization for Scientific Research NWO (Medical Research Council program grant GB-MW 940-38-011; ZonMW Brainpower grant 100-001-004; ZonMw Risk Behavior and Dependence grant 60-60600-97-118; ZonMw Culture and Health grant 261-98-710; Social Sciences Council medium-sized investment grants GB-MaGW 480-01-006 and GB-MaGW 480-07-001; Social Sciences Council project grants GB-MaGW 452-04-314 and GB-MaGW 452-06-004; NWO large-sized investment grant 175.010.2003.005; NWO Longitudinal Survey and Panel Funding 481-08-013 and 481-11-001; NWO Vici 016.130.002 and 453-16-007/2735; NWO Gravitation 024.001.003), the Dutch Ministry of Justice (WODC), the European Science Foundation (EuroSTRESS project FP-006), the European Research Council (ERC-2017-STG-757364 en ERC-CoG-2015-681466), Biobanking and Biomolecular Resources Research Infrastructure BBMRI-NL (CP 32), the participating universities, and Accare Centre for Child and Adolescent Psychiatry. Statistical analyses were carried out on the Genetic Cluster Computer (<http://www.geneticcluster.org>), which is financially supported by the Netherlands Scientific Organization (NWO 480-05-003) along with a supplement from the Dutch Brain Foundation.

### **Tromso-6 Migraine (TromsoMig)**

We thank all participants that attended the Tromsø Study.

### **The Trøndelag Health Study (HUNT)**

The Trøndelag Health Study (HUNT) is a collaboration between HUNT Research Centre (Faculty of Medicine and Health Sciences, NTNU, Norwegian University of Science and Technology), Trøndelag County Council, Central Norway Regional Health Authority, and the Norwegian Institute of Public Health. The genetic investigations of the HUNT Study is a collaboration between investigators from the HUNT study and University of Michigan Medical School and the University of Michigan School of Public Health. The K.G. Jebsen Center for Genetic Epidemiology is financed by Stiftelsen Kristian Gerhard Jebsen; Faculty of Medicine and Health Sciences, NTNU, Norwegian University of Science and Technology and Central Norway Regional Health Authority.

### **TwinGene**

TwinGene is part of the Swedish Twin Registry, managed by Karolinska Institutet and receiving funding through the Swedish Research Council under the grant no 2017-00641.

### **TwinsUK (TUK)**

We are grateful to the twins who took part in TwinsUK and the whole TwinsUK team, which includes academic researchers, clinical staff, laboratory technicians, administrative staff and research managers. TwinsUK receives funding from the Wellcome Trust (212904/Z/18/Z), Medical Research Council (AIMHY; MR/M016560/1) and European Union (H2020 contract #733100). TwinsUK and M.M. are supported by the National Institute for Health Research (NIHR)-funded BioResource, Clinical Research Facility and Biomedical Research Centre based at Guy's and St Thomas' NHS Foundation Trust in partnership with King's College London. P.C. is funded by the European Union (H2020 contract #733100).

### **UK Biobank**

We are grateful to UK Biobank participants. This research has been conducted using the UK Biobank Resource under project 12505. LY was funded by the Australian Research Council (DE200100425). PMV was funded by the Australian Research Council (FL180100072) and the Australian National Health and Medical Research Council (Grant #1113400). JY was funded by the Australian National Health and Medical Research Council (Grant #1113400) and Westlake Education Foundation. R.E.M. was supported by US National Institutes of Health (NIH) grant K25 HL150334. PRL was funded by US NIH grant DP2 ES030554, a Burroughs Wellcome Fund Career Award at the Scientific Interfaces, the Next Generation Fund at the Broad Institute of MIT and Harvard, and a Sloan Research Fellowship.

### **Understanding Society: The UK Household Longitudinal Study (UKHLS)**

These data are from Understanding Society: The UK Household Longitudinal Study, which is led by the Institute for Social and Economic Research at the University of Essex and funded by the Economic and Social Research Council. The data were collected by NatCen and the genome wide scan data were analysed by the Wellcome Trust Sanger Institute. The Understanding Society DAC have an application system for genetics data and all use of the data should be approved by them. The application form is at: <https://www.understandingsociety.ac.uk/about/health/data>. The UK Household Longitudinal Study was funded by grants from the Economic & Social Research Council (ES/H029745/1) and the Wellcome Trust (WT098051).

### **VA Million Veteran Program (MVP)**

The MVP gratefully acknowledges the contributions of the participants and of the study staff. This research is based on data from the Million Veteran Program, Office of Research and Development, Veterans Health Administration, and was supported by award # I01-BX004821 (MVP 001, PIs Peter Wilson and Kelly Cho). This publication does not represent the views of the Department of Veteran Affairs or the United States Government. YVS was partly supported by NR013520 and DK125187 from NIH. SR was supported by US Department of Veterans Affairs grant IK2-CX001907 and a Webb-Waring Biomedical Research Award from the Boettcher Foundation. MVP acknowledgements and banner authors include:

#### MVP Executive Committee

Co-Chair: J. Michael Gaziano, M.D., M.P.H., VA Boston Healthcare System, 150 S. Huntington Avenue, Boston, MA 02130

Co-Chair: Sumitra Muralidhar, Ph.D., US Department of Veterans Affairs, 810 Vermont Avenue NW, Washington, DC 20420

Rachel Ramoni, D.M.D., Sc.D., Chief VA Research and Development Officer, US Department of Veterans Affairs, 810 Vermont Avenue NW, Washington, DC 20420

Jean Beckham, Ph.D., Durham VA Medical Center, 508 Fulton Street, Durham, NC 27705

Kyong-Mi Chang, M.D., Philadelphia VA Medical Center, 3900 Woodland Avenue, Philadelphia, PA 19104

Philip S. Tsao, Ph.D., VA Palo Alto Health Care System, 3801 Miranda Avenue, Palo Alto, CA 94304

James Breeling, M.D., Ex-Officio, US Department of Veterans Affairs, 810 Vermont Avenue NW, Washington, DC 20420

Grant Huang, Ph.D., Ex-Officio, US Department of Veterans Affairs, 810 Vermont Avenue NW, Washington, DC 20420

Juan P. Casas, M.D., Ph.D., Ex-Officio, VA Boston Healthcare System, 150 S. Huntington Avenue, Boston, MA 02130

#### MVP Program Office

Sumitra Muralidhar, Ph.D., US Department of Veterans Affairs, 810 Vermont Avenue NW, Washington, DC 20420

Jennifer Moser, Ph.D., US Department of Veterans Affairs, 810 Vermont Avenue NW, Washington, DC 20420

#### MVP Recruitment/Enrollment

MVP Cohort Management Director/Recruitment/Enrollment Director, Boston – Stacey B. Whitbourne, Ph.D.; Jessica V. Brewer, M.P.H., VA Boston Healthcare System, 150 S. Huntington Avenue, Boston, MA 02130

VA Central Biorepository, Boston – Mary T. Brophy M.D., M.P.H.; Donald E. Humphries, Ph.D.; Luis E. Selva, Ph.D., VA Boston Healthcare System, 150 S. Huntington Avenue, Boston, MA 02130

MVP Informatics, Boston – Nhan Do, M.D.; Shahpoor (Alex) Shayan, M.S., VA Boston Healthcare System, 150 S. Huntington Avenue, Boston, MA 02130

MVP Data Operations/Analytics, Boston – Kelly Cho, M.P.H., Ph.D., VA Boston Healthcare System, 150 S. Huntington Avenue, Boston, MA 02130

Director of Regulatory Affairs – Lori Churby, B.S., VA Palo Alto Health Care System, 3801 Miranda Avenue, Palo Alto, CA 94304

### MVP Coordinating Centers

- Cooperative Studies Program Clinical Research Pharmacy Coordinating Center, Albuquerque – Todd Connor, Pharm.D.; Dean P. Argyres, B.S., M.S., New Mexico VA Health Care System, 1501 San Pedro Drive SE, Albuquerque, NM 87108
- Genomics Coordinating Center, Palo Alto – Philip S. Tsao, Ph.D., VA Palo Alto Health Care System, 3801 Miranda Avenue, Palo Alto, CA 94304
- MVP Boston Coordinating Center, Boston - J. Michael Gaziano, M.D., M.P.H., VA Boston Healthcare System, 150 S. Huntington Avenue, Boston, MA 02130
- MVP Information Center, Canandaigua – Brady Stephens, M.S., Canandaigua VA Medical Center, 400 Fort Hill Avenue, Canandaigua, NY 14424

### MVP Science

Saiju Pyarajan Ph.D., VA Boston Healthcare System, 150 S. Huntington Avenue, Boston, MA 02130

Philip S. Tsao, Ph.D., VA Palo Alto Health Care System, 3801 Miranda Avenue, Palo Alto, CA 94304

Data Core - Kelly Cho, M.P.H, Ph.D., VA Boston Healthcare System, 150 S. Huntington Avenue, Boston, MA 02130

VA Informatics and Computing Infrastructure (VINCI) – Scott L. DuVall, Ph.D., VA Salt Lake City Health Care System, 500 Foothill Drive, Salt Lake City, UT 84148

Data and Computational Sciences – Saiju Pyarajan, Ph.D., VA Boston Healthcare System, 150 S. Huntington Avenue, Boston, MA 02130

Statistical Genetics – Elizabeth Hauser, Ph.D., Durham VA Medical Center, 508 Fulton Street, Durham, NC 27705; Yan Sun, Ph.D., Atlanta VA Medical Center, 1670 Clairmont Road, Decatur, GA 30033; Hongyu Zhao, Ph.D., West Haven VA Medical Center, 950 Campbell Avenue, West Haven, CT 06516

### Current MVP Local Site Investigators

Atlanta VA Medical Center (Peter Wilson, M.D.), 1670 Clairmont Road, Decatur, GA 30033

Bay Pines VA Healthcare System (Rachel McArdle, Ph.D.), 10,000 Bay Pines Blvd Bay Pines, FL 33744

Birmingham VA Medical Center (Louis Dellitalia, M.D.), 700 S. 19th Street, Birmingham AL 35233

Central Western Massachusetts Healthcare System (Kristin Mattocks, Ph.D., M.P.H.), 421 North Main Street, Leeds, MA 01053

Cincinnati VA Medical Center (John Harley, M.D., Ph.D.), 3200 Vine Street, Cincinnati, OH 45220

Clement J. Zablocki VA Medical Center (Jeffrey Whittle, M.D., M.P.H.), 5000 West National Avenue, Milwaukee, WI 53295

VA Northeast Ohio Healthcare System (Frank Jacono, M.D.), 10701 East Boulevard, Cleveland, OH 44106

Durham VA Medical Center (Jean Beckham, Ph.D.), 508 Fulton Street, Durham, NC 27705

Edith Nourse Rogers Memorial Veterans Hospital (John Wells, Ph.D.), 200 Springs Road, Bedford, MA 01730

Edward Hines, Jr. VA Medical Center (Salvador Gutierrez, M.D.), 5000 South 5th Avenue, Hines, IL 60141

Veterans Health Care System of the Ozarks (Kathrina Alexander, M.D.), 1100 North College Avenue, Fayetteville, AR 72703

Fargo VA Health Care System (Kimberly Hammer, Ph.D.), 2101 N. Elm, Fargo, ND 58102

VA Health Care Upstate New York (James Norton, Ph.D.), 113 Holland Avenue, Albany, NY 12208

New Mexico VA Health Care System (Gerardo Villareal, M.D.), 1501 San Pedro Drive, S.E. Albuquerque, NM 87108

VA Boston Healthcare System (Scott Kinlay, M.B.B.S., Ph.D.), 150 S. Huntington Avenue, Boston, MA 02130

VA Western New York Healthcare System (Junzhe Xu, M.D.), 3495 Bailey Avenue, Buffalo, NY 14215-1199

Ralph H. Johnson VA Medical Center (Mark Hamner, M.D.), 109 Bee Street, Mental Health Research, Charleston, SC 29401

Columbia VA Health Care System (Roy Mathew, M.D.), 6439 Garners Ferry Road, Columbia, SC 29209  
VA North Texas Health Care System (Sujata Bhushan, M.D.), 4500 S. Lancaster Road, Dallas, TX 75216  
Hampton VA Medical Center (Pran Iruvanti, D.O., Ph.D.), 100 Emancipation Drive, Hampton, VA 23667  
Richmond VA Medical Center (Michael Godschalk, M.D.), 1201 Broad Rock Blvd., Richmond, VA 23249  
Iowa City VA Health Care System (Zuhair Ballas, M.D.), 601 Highway 6 West, Iowa City, IA 52246-2208  
Eastern Oklahoma VA Health Care System (River Smith, Ph.D.), 1011 Honor Heights Drive, Muskogee, OK 74401  
James A. Haley Veterans' Hospital (Stephen Mastorides, M.D.), 13000 Bruce B. Downs Blvd, Tampa, FL 33612  
James H. Quillen VA Medical Center (Jonathan Moorman, M.D., Ph.D.), Corner of Lamont & Veterans Way, Mountain Home, TN 37684  
John D. Dingell VA Medical Center (Saib Gappy, M.D.), 4646 John R Street, Detroit, MI 48201  
Louisville VA Medical Center (Jon Klein, M.D., Ph.D.), 800 Zorn Avenue, Louisville, KY 40206  
Manchester VA Medical Center (Nora Ratcliffe, M.D.), 718 Smyth Road, Manchester, NH 03104  
Miami VA Health Care System (Ana Palacio, M.D., M.P.H.), 1201 NW 16th Street, 11 GRC, Miami FL 33125  
Michael E. DeBakey VA Medical Center (Olaoluwa Okusaga, M.D.), 2002 Holcombe Blvd, Houston, TX 77030  
Minneapolis VA Health Care System (Maureen Murdoch, M.D., M.P.H.), One Veterans Drive, Minneapolis, MN 55417  
N. FL/S. GA Veterans Health System (Peruvemba Sriram, M.D.), 1601 SW Archer Road, Gainesville, FL 32608  
Northport VA Medical Center (Shing Shing Yeh, Ph.D., M.D.), 79 Middleville Road, Northport, NY 11768  
Overton Brooks VA Medical Center (Neeraj Tandon, M.D.), 510 East Stoner Ave, Shreveport, LA 71101  
Philadelphia VA Medical Center (Darshana Jhala, M.D.), 3900 Woodland Avenue, Philadelphia, PA 19104  
Phoenix VA Health Care System (Samuel Aguayo, M.D.), 650 E. Indian School Road, Phoenix, AZ 85012  
Portland VA Medical Center (David Cohen, M.D.), 3710 SW U.S. Veterans Hospital Road, Portland, OR 97239  
Providence VA Medical Center (Satish Sharma, M.D.), 830 Chalkstone Avenue, Providence, RI 02908  
Richard Roudebush VA Medical Center (Suthat Liangpunsakul, M.D., M.P.H.), 1481 West 10th Street, Indianapolis, IN 46202  
Salem VA Medical Center (Kris Ann Oursler, M.D.), 1970 Roanoke Blvd, Salem, VA 24153  
San Francisco VA Health Care System (Mary Whooley, M.D.), 4150 Clement Street, San Francisco, CA 94121  
South Texas Veterans Health Care System (Sunil Ahuja, M.D.), 7400 Merton Minter Boulevard, San Antonio, TX 78229  
Southeast Louisiana Veterans Health Care System (Joseph Constans, Ph.D.), 2400 Canal Street, New Orleans, LA 70119  
Southern Arizona VA Health Care System (Paul Meyer, M.D., Ph.D.), 3601 S 6th Avenue, Tucson, AZ 85723  
Sioux Falls VA Health Care System (Jennifer Greco, M.D.), 2501 W 22nd Street, Sioux Falls, SD 57105  
St. Louis VA Health Care System (Michael Rauchman, M.D.), 915 North Grand Blvd, St. Louis, MO 63106  
Syracuse VA Medical Center (Richard Servatius, Ph.D.), 800 Irving Avenue, Syracuse, NY 13210  
VA Eastern Kansas Health Care System (Melinda Gaddy, Ph.D.), 4101 S 4th Street Trafficway, Leavenworth, KS 66048  
VA Greater Los Angeles Health Care System (Agnes Wallbom, M.D., M.S.), 11301 Wilshire Blvd, Los Angeles, CA 90073  
VA Long Beach Healthcare System (Timothy Morgan, M.D.), 5901 East 7th Street Long Beach, CA 90822  
VA Maine Healthcare System (Todd Stapley, D.O.), 1 VA Center, Augusta, ME 04330  
VA New York Harbor Healthcare System (Peter Liang, M.D., M.P.H.), 423 East 23rd Street, New York, NY 10010  
VA Pacific Islands Health Care System (Daryl Fujii, Ph.D.), 459 Patterson Rd, Honolulu, HI 96819  
VA Palo Alto Health Care System (Philip Tsao, Ph.D.), 3801 Miranda Avenue, Palo Alto, CA 94304-1290  
VA Pittsburgh Health Care System (Patrick Strollo, Jr., M.D.), University Drive, Pittsburgh, PA 15240

VA Puget Sound Health Care System (Edward Boyko, M.D.), 1660 S. Columbian Way, Seattle, WA 98108-1597

VA Salt Lake City Health Care System (Jessica Walsh, M.D.), 500 Foothill Drive, Salt Lake City, UT 84148

VA San Diego Healthcare System (Samir Gupta, M.D., M.S.C.S.), 3350 La Jolla Village Drive, San Diego, CA 92161

VA Sierra Nevada Health Care System (Mostaqul Huq, Pharm.D., Ph.D.), 975 Kirman Avenue, Reno, NV 89502

VA Southern Nevada Healthcare System (Joseph Fayad, M.D.), 6900 North Pecos Road, North Las Vegas, NV 89086

VA Tennessee Valley Healthcare System (Adriana Hung, M.D., M.P.H.), 1310 24th Avenue, South Nashville, TN 37212

Washington DC VA Medical Center (Jack Lichy, M.D., Ph.D.), 50 Irving St, Washington, D. C. 20422

W.G. (Bill) Hefner VA Medical Center (Robin Hurley, M.D.), 1601 Brenner Ave, Salisbury, NC 28144

White River Junction VA Medical Center (Brooks Robey, M.D.), 163 Veterans Drive, White River Junction, VT 05009

William S. Middleton Memorial Veterans Hospital (Prakash Balasubramanian, M.D.), 2500 Overlook Terrace, Madison, WI 53705

### **Vejle Biobank**

The Vejle Diabetes Biobank was supported by The Danish Research Council for Independent Research and by Region of Southern Denmark.

### **Viking Health Study - Shetland (VIKING)**

DNA extractions and genotyping were performed at the Edinburgh Clinical Research Facility, University of Edinburgh. We would like to acknowledge the invaluable contributions of the research nurses in Shetland, the administrative team in Edinburgh and the people of Shetland. KAK acknowledges funding from the Medical Research Council Doctoral Training Programme in Precision Medicine (MR/N013166/1). VIKING was supported by the MRC Human Genetics Unit programme grant, "Quantitative traits in health and disease" (U. MC\_UU\_00007/10).

### **Wake Forest School of Medicine Study (WFSM)**

WFSM gratefully acknowledges the contributions of the participants and of the study staff. Genotyping services were provided by the Center for Inherited Disease Research (CIDR). CIDR is fully funded through a federal contract from the National Institutes of Health to The Johns Hopkins University, contract number HHSC268200782096C. This work was supported by National Institutes of Health grants R01 DK087914, R01 DK066358, R01 DK053591, U01 DK105556 and by the Wake Forest School of Medicine grant M01 RR07122 and Venture Fund.

### **Wenzhou Medical University Biobank - Tibetans (WMUB-T)**

The WMUB-T gratefully acknowledges the contributions of the participants and of the study staff. Jian Y. is funded by the Westlake Education Foundation.

### **Whitehall II (WHII)**

We thank all the participating civil service departments and their welfare, personnel, and establishment officers; the British Occupational Health and Safety Agency; the British Council of Civil Service Unions; all participating civil servants in the Whitehall II study; and all members of the Whitehall II study team. The Whitehall II Study team comprises research scientists, statisticians, study coordinators, nurses, data managers, administrative assistants, and data entry staff, all of whom made this study possible. The Whitehall II study is supported by grants from the Wellcome Trust (221854/Z/20/Z), the UK Medical Research Council (MRC, K013351 and R024227), the US National Institute on Aging (R01AG056477; R01AG034454), and the British Heart Foundation (32334). Kivimaki is supported by grants from the Wellcome Trust (221854/Z/20/Z), the UK Medical Research Council (MRC, K013351 and R024227), the US National Institute on Aging (R01AG056477; R01AG034454) and Academy of

Finland (329202). Kumari is supported by grants from ESRC (ES/S007253/1 ; ES/T002611/1; ES/T014083/1).

### **Wellcome Genetic (WELLGEN)**

The WELLGEN is grateful and obliged to the study participants and other staff members who contributed to the study. Investigator support from the Council of Scientific and Industrial Research, Ministry of Science and Technology, Govt. of India, New delhi, India.

### **Women's Genome Health Study (WGHS)**

The WGHS is supported by the National Heart, Lung, and Blood Institute (HL043851 and HL080467) and the National Cancer Institute (CA047988 and UM1CA182913) to Julie Buring and I-Min Lee, with funding for genotyping provided by Amgen. (Ridker, Chasman, PIs).

### **Women's Health Initiative (WHI)**

The WHI program is funded by the National Heart, Lung, and Blood Institute, National Institutes of Health, U.S. Department of Health and Human Services through contracts 75N92021D00001, 75N92021D00002, 75N92021D00003, 75N92021D00004, 75N92021D00005.

### **Yonsei Avellino Corneal Dystrophy Study (ACD)**

The ACD gratefully acknowledges the contributions of the participants and of the study staff. We are thankful for the computing resources provided by the Global Science experimental Data hub Center (GSDC) Project and the Korea Research Environment Open NETwork (KREONET) of the Korea Institute of Science and Technology Information (KISTI).

### **Young Finns Study (YFS)**

We thank the teams that collected data at all measurement time points; the persons who participated as both children and adults in these longitudinal studies; and biostatisticians Irina Lisinen, Johanna Ikonen, Noora Kartiosuo, Ville Aalto, and Jarno Kankaanranta for data management and statistical advice. The Young Finns Study has been financially supported by the Academy of Finland: grants 322098, 286284, 134309 (Eye), 126925, 121584, 124282, 129378 (Salve), 117787 (Gendi), and 41071 (Skidi); the Social Insurance Institution of Finland; Competitive State Research Financing of the Expert Responsibility area of Kuopio, Tampere and Turku University Hospitals (grant X51001); Juho Vainio Foundation; Paavo Nurmi Foundation; Finnish Foundation for Cardiovascular Research ; Finnish Cultural Foundation; The Sigrid Juselius Foundation; Tampere Tuberculosis Foundation; Emil Aaltonen Foundation; Yrjö Jahnsson Foundation; Signe and Ane Gyllenberg Foundation; Diabetes Research Foundation of Finnish Diabetes Association; EU Horizon 2020 (grant 755320 for TAXINOMISIS and grant 848146 for To Aition); European Research Council (grant 742927 for MULTIEPIGEN project); Tampere University Hospital Supporting Foundation and Finnish Society of Clinical Chemistry.

### **1958BC-WTCCC and 1958BC-T1DGC.**

This work made use of data and samples generated by the 1958 Birth Cohort (NCDS), which is managed by the Centre for Longitudinal Studies at the UCL Institute of Education, The authors are deeply grateful to the 1958 birth cohort participants for their longstanding commitment and support, and to all staff for cohort coordination and data collection. The management of the 1958 Birth Cohort is funded by the Economic and Social Research Council (grant number ES/M001660/1). Access to these resources was enabled via the 58READIE Project funded by Wellcome Trust and Medical Research Council (grant numbers WT095219MA and G1001799). DNA collection was funded by MRC grant G0000934 and cell-line creation by Wellcome Trust grant 068545/Z/02. This study makes use of data generated by the Wellcome Trust Case-Control Consortium. A full list of investigators who contributed to generation of the data is available from the Wellcome Trust Case-Control Consortium website. Funding for the project was provided by the Wellcome Trust under the award 076113. This research used resources provided by the Type 1 Diabetes Genetics Consortium, a collaborative clinical study sponsored by the National Institute of Diabetes and Digestive and Kidney Diseases (NIDDK), National Institute of Allergy and



Infectious Diseases, National Human Genome Research Institute, National Institute of Child Health and Human Development, and Juvenile Diabetes Research Foundation International (JDRF) and supported by U01 DK062418. M.I.M. was a Wellcome Investigator and NIHR Senior Investigator. This work was supported by: NIDDK (U01-DK105535) and Wellcome (090532, 098381, 106130, 203141, 212259).

## **Consortium acknowledgements and detailed affiliations**

### **23andMe Research Team**

Stella Aslibekyan<sup>12</sup>, Adam Auton<sup>12</sup>, Elizabeth Babalola<sup>12</sup>, Robert K. Bell<sup>12</sup>, Jessica Bielenberg<sup>12</sup>, Katarzyna Bryc<sup>12</sup>, Emily Bullis<sup>12</sup>, Daniella Coker<sup>12</sup>, Gabriel Cuellar Partida<sup>12</sup>, Devika Dhamija<sup>12</sup>, Sayantan Das<sup>12</sup>, Sarah L. Elson<sup>12</sup>, Teresa Filshtein<sup>12</sup>, Kipper Fletez-Brant<sup>12</sup>, Pierre Fontanillas<sup>12</sup>, Will Freyman<sup>12</sup>, Pooja M. Gandhi<sup>12</sup>, Karl Heilbron<sup>12</sup>, Barry Hicks<sup>12</sup>, David A. Hinds<sup>12</sup>, Ethan M. Jewett<sup>12</sup>, Katelyn Kukar<sup>12</sup>, Keng-Han Lin<sup>12</sup>, Maya Lowe<sup>12</sup>, Jey C. McCreight<sup>12</sup>, Matthew H. McIntyre<sup>12</sup>, Steven J. Micheletti<sup>12</sup>, Meghan E. Moreno<sup>12</sup>, Joanna L. Mountain<sup>12</sup>, Priyanka Nandakumar<sup>12</sup>, Elizabeth S. Noblin<sup>12</sup>, Jared O'Connell<sup>12</sup>, Aaron A. Petrakovitz<sup>12</sup>, G. David Poznik<sup>12</sup>, Morgan Schumacher<sup>12</sup>, Anjali J. Shastri<sup>12</sup>, Janie F. Shelton<sup>12</sup>, Suyash Shringarpure<sup>12</sup>, Vinh Tran<sup>12</sup>, Joyce Y. Tung<sup>12</sup>, Xin Wang<sup>12</sup>, Wei Wang<sup>12</sup>, Catherine H. Weldon<sup>12</sup>, Peter Wilton<sup>12</sup>, Alejandro Hernandez<sup>12</sup>, Corinna Wong<sup>12</sup>, Christophe Toukam Tchakouté<sup>12</sup>

<sup>12</sup>23andMe, Inc., Sunnyvale, CA 94086, USA

### **VA Million Veteran Program**

J. Michael Gaziano<sup>506</sup>, Sumitra Muralidhar<sup>507</sup>, Rachel Ramoni<sup>507</sup>, Jean Beckham<sup>508</sup>, Kyong-Mi Chang<sup>509</sup>, Philip S. Tsao<sup>510</sup>, James Breeling<sup>507</sup>, Grant Huang<sup>507</sup>, Juan P. Casas<sup>506</sup>, Jennifer Moser<sup>507</sup>, Stacey B. Whitbourne<sup>506</sup>, Jessica V. Brewer<sup>506</sup>, Mary T. Brophy<sup>506</sup>, Donald E. Humphries<sup>506</sup>, Luis E. Selva<sup>506</sup>, Nhan Do<sup>506</sup>, Shahpoor Shayan<sup>506</sup>, Kelly Cho<sup>506</sup>, Lori Churby<sup>510</sup>, Todd Connor<sup>511</sup>, Dean P. Argyres<sup>511</sup>, Brady Stephens<sup>512</sup>, Saiju Pyarajan<sup>5,57,81</sup>, Scott L. DuVall<sup>513</sup>, Elizabeth Hauser<sup>508</sup>, Yan Sun<sup>493,494</sup>, Hongyu Zhao<sup>514</sup>, Peter Wilson<sup>515</sup>, Rachel McArdle<sup>516</sup>, Louis Dellitalia<sup>517</sup>, Kristin Mattocks<sup>518</sup>, John Harley<sup>519</sup>, Jeffrey Whittle<sup>520</sup>, Frank Jacono<sup>521</sup>, John Wells<sup>522</sup>, Salvador Gutierrez<sup>523</sup>, Kathrina Alexander<sup>524</sup>, Kimberly Hammer<sup>525</sup>, James Norton<sup>526</sup>, Gerardo Villareal<sup>511</sup>, Scott Kinlay<sup>506</sup>, Junzhe Xu<sup>527</sup>, Mark Hammer<sup>528</sup>, Roy Mathew<sup>529</sup>, Sujata Bhushan<sup>530</sup>, Pran Iruvanti<sup>531</sup>, Michael Godschalk<sup>532</sup>, Zuhair Ballas<sup>533</sup>, River Smith<sup>534</sup>, Stephen Mastorides<sup>535</sup>, Jonathan Moorman<sup>536</sup>, Saib Gappy<sup>537</sup>, Jon Klein<sup>538</sup>, Nora Ratcliffe<sup>539</sup>, Ana Palacio<sup>540</sup>, Olaoluwa Okusaga<sup>541</sup>, Maureen Murdoch<sup>542</sup>, Peruvemba Sriram<sup>543</sup>, Shing Shing Yeh<sup>544</sup>, Neeraj Tandon<sup>545</sup>, Darshana Jhala<sup>509</sup>, Samuel Aguayo<sup>546</sup>, David Cohen<sup>547</sup>, Satish Sharma<sup>548</sup>, Suthat Liangpunsakul<sup>549</sup>, Kris Ann Oursler<sup>550</sup>, Mary Whooley<sup>551</sup>, Sunil Ahuja<sup>552</sup>, Joseph Constans<sup>553</sup>, Paul Meyer<sup>554</sup>, Jennifer Greco<sup>555</sup>, Michael Rauchman<sup>556</sup>, Richard Servatius<sup>557</sup>, Melinda Gaddy<sup>558</sup>, Agnes Wallbom<sup>559</sup>, Timothy Morgan<sup>560</sup>, Todd Stapley<sup>561</sup>, Peter Liang<sup>562</sup>, Daryl Fujii<sup>563</sup>, Patrick Strollo, Jr.<sup>564</sup>, Edward Boyko<sup>565</sup>, Jessica Walsh<sup>513</sup>, Samir Gupta<sup>566</sup>, Mostaqul Huq<sup>567</sup>, Joseph Fayad<sup>568</sup>, Adriana Hung<sup>569</sup>, Jack Lichy<sup>570</sup>, Robin Hurley<sup>571</sup>, Brooks Robey<sup>572</sup>, Prakash Balasubramanian<sup>573</sup>

<sup>5</sup>Harvard Medical School, Boston, MA 02115, USA, <sup>57</sup>Department of Medicine, Brigham and Women's Hospital, Boston, MA 02115, USA, <sup>81</sup>Center for Data and Computational Sciences, VA Boston Healthcare System, Boston, MA, USA, <sup>493</sup>Department of Epidemiology, Emory University Rollins School of Public Health, Atlanta, GA 30322, USA, <sup>494</sup>Atlanta VA Health Care System, Decatur, GA 30033, USA, <sup>506</sup>VA Boston Healthcare System, Boston, MA 02130, USA, <sup>507</sup>US Department of Veterans Affairs, Washington, DC 20420, USA, <sup>508</sup>Durham VA Medical Center, Durham, NC 27705, USA, <sup>509</sup>Philadelphia VA Medical Center, Philadelphia, PA 19104, USA, <sup>510</sup>VA Palo Alto Health Care System, Palo Alto, CA 94304, USA, <sup>511</sup>New Mexico VA Health Care System, Albuquerque, NM 87108, USA, <sup>512</sup>Canandaigua VA Medical Center, Canandaigua, NY 14424, USA, <sup>513</sup>VA Salt Lake City Health Care System, Salt Lake City, UT 84148, USA, <sup>514</sup>West Haven VA Medical Center, West Haven, CT 06516, <sup>515</sup>Atlanta VA Medical Center, Decatur, GA 30033, USA, <sup>516</sup>Bay Pines VA Healthcare System, Bay Pines, FL 33744, USA, <sup>517</sup>Birmingham VA Medical Center, Birmingham AL 35233, USA, <sup>518</sup>Central Western Massachusetts Healthcare System, Leeds, MA 01053, USA, <sup>519</sup>Cincinnati VA Medical Center, Cincinnati, OH 45220, USA, <sup>520</sup>Clement J.

Zablocki VA Medical Center , Milwaukee, WI 53295, USA, <sup>521</sup>VA Northeast Ohio Healthcare System, Cleveland, OH 44106, USA, <sup>522</sup>Edith Nourse Rogers Memorial Veterans Hospital, Bedford, MA 01730, USA, <sup>523</sup>Edward Hines, Jr. VA Medical Center, Hines, IL 60141, USA, <sup>524</sup>Veterans Health Care System of the Ozarks, Fayetteville, AR 72703, USA, <sup>525</sup>Fargo VA Health Care System, Fargo, ND 58102, USA, <sup>526</sup>VA Health Care Upstate New York, Albany, NY 12208, USA, <sup>527</sup>VA Western New York Healthcare System, Buffalo, NY 14215-1199, USA, <sup>528</sup>Ralph H. Johnson VA Medical Center, Charleston, SC 29401, USA, <sup>529</sup>Columbia VA Health Care System, Columbia, SC 29209, USA, <sup>530</sup>VA North Texas Health Care System, Dallas, TX 75216, USA, <sup>531</sup>Hampton VA Medical Center, Hampton, VA 23667, USA, <sup>532</sup>Richmond VA Medical Center, Richmond, VA 23249, USA, <sup>533</sup>Iowa City VA Health Care System, Iowa City, IA 52246-2208, USA, <sup>534</sup>Eastern Oklahoma VA Health Care System, Muskogee, OK 74401, USA, <sup>535</sup>James A. Haley Veterans' Hospital, Tampa, FL 33612, USA, <sup>536</sup>James H. Quillen VA Medical Center, Mountain Home, TN 37684, USA, <sup>537</sup>John D. Dingell VA Medical Center, Detroit, MI 48201, USA, <sup>538</sup>Louisville VA Medical Center, Louisville, KY 40206, USA, <sup>539</sup>Manchester VA Medical Center, Manchester, NH 03104, USA, <sup>540</sup>Miami VA Health Care System, Miami FL 33125, USA, <sup>541</sup>Michael E. DeBakey VA Medical Center, Houston, TX 77030, USA, <sup>542</sup>Minneapolis VA Health Care System, Minneapolis, MN 55417, USA, <sup>543</sup>N. FL/S. GA Veterans Health System, Gainesville, FL 32608, USA, <sup>544</sup>Northport VA Medical Center, Northport, NY 11768, USA, <sup>545</sup>Overton Brooks VA Medical Center, Shreveport, LA 71101, USA, <sup>546</sup>Phoenix VA Health Care System, Phoenix, AZ 85012, USA, <sup>547</sup>Portland VA Medical Center, Portland, OR 97239, USA, <sup>548</sup>Providence VA Medical Center, Providence, RI 02908, USA, <sup>549</sup>Richard Roudebush VA Medical Center, Indianapolis, IN 46202, USA, <sup>550</sup>Salem VA Medical Center, Salem, VA 24153, USA, <sup>551</sup>San Francisco VA Health Care System, San Francisco, CA 94121, USA, <sup>552</sup>South Texas Veterans Health Care System, San Antonio, TX 78229, USA, <sup>553</sup>Southeast Louisiana Veterans Health Care System, New Orleans, LA 70119, USA, <sup>554</sup>Southern Arizona VA Health Care System, Tucson, AZ 85723, USA, <sup>555</sup>Sioux Falls VA Health Care System, Sioux Falls, SD 57105, USA, <sup>556</sup>St. Louis VA Health Care System, St. Louis, MO 63106, USA, <sup>557</sup>Syracuse VA Medical Center, Syracuse, NY 13210, USA, <sup>558</sup>VA Eastern Kansas Health Care System, Leavenworth, KS 66048, USA, <sup>559</sup>VA Greater Los Angeles Health Care System, Los Angeles, CA 90073, USA, <sup>560</sup>VA Long Beach Healthcare System, Long Beach, CA 90822, USA, <sup>561</sup>VA Maine Healthcare System, Augusta, ME 04330, uSA, <sup>562</sup>VA New York Harbor Healthcare System, New York, NY 10010, USA, <sup>563</sup>VA Pacific Islands Health Care System, Honolulu, HI 96819, USA, <sup>564</sup>VA Pittsburgh Health Care System, Pittsburgh, PA 15240, USA, <sup>565</sup>VA Puget Sound Health Care System, Seattle, WA 98108-1597, USA, <sup>566</sup>VA San Diego Healthcare System, San Diego, CA 92161, USA, <sup>567</sup>VA Sierra Nevada Health Care System, Reno, NV 89502, USA, <sup>568</sup>VA Southern Nevada Healthcare System, North Las Vegas, NV 89086, USA, <sup>569</sup>VA Tennessee Valley Healthcare System, South Nashville, TN 37212, USA, <sup>570</sup>Washington DC VA Medical Center, Washington, D. C. 20422, USA, <sup>571</sup>W.G. (Bill) Hefner VA Medical Center, Salisbury, NC 28144, USA, <sup>572</sup>White River Junction VA Medical Center, White River Junction, VT 05009, USA, <sup>573</sup>William S. Middleton Memorial Veterans Hospital, Madison, WI 53705, USA

### **DiscovEHR (DiscovEHR and MyCode Community Health Initiative)**

Jason E. Miller<sup>190,191</sup>, Shefali S. Verma<sup>67</sup>, Anne E. Justice<sup>9,496</sup>

<sup>9</sup>Department of Epidemiology, Gillings School of Global Public Health, University of North Carolina at Chapel Hill, Chapel Hill, NC 27516, USA, <sup>67</sup>Department of Pathology and Laboratory Medicine, University of Pennsylvania, Philadelphia, PA 19104, USA, <sup>190</sup>Biomedical and Translational Informatics Institute, Geisinger, Danville, PA 17821, USA, <sup>191</sup>Department of Genetics, Institute for Biomedical Informatics, Perelman School of Medicine, University of Pennsylvania, Philadelphia, PA 19104, USA, <sup>496</sup>Department of Population Health Sciences, Geisinger, Danville, PA 17822, USA

### **eMERGE (Electronic Medical Records and Genomics Network)**

Murray Brilliant<sup>574</sup>, Wendy Chung<sup>575,576</sup>, Paul Crane<sup>577</sup>, Damien Croteau-Chonka<sup>57</sup>, Josh Denny<sup>450,578</sup>, Todd Edwards<sup>58,579</sup>, Geoff Hayes<sup>580</sup>, Scott Hebring<sup>581</sup>, George Hripsak<sup>582</sup>, Krzysztof Kiryluk<sup>576</sup>, Terrie Kitchner<sup>574</sup>, Iftikhar Kullo<sup>583</sup>, Bahram Namjou<sup>584</sup>, Peggy Peissig<sup>574</sup>, Ning Shang<sup>576</sup>, Digna Velez Edwards<sup>578,579,585</sup>, Chunhua Weng<sup>582</sup>

<sup>57</sup>Department of Medicine, Brigham and Women's Hospital, Boston, MA 02115, USA, <sup>58</sup>Division of Epidemiology, Department of Medicine, Vanderbilt University Medical Center, Nashville, TN 37232, USA, <sup>450</sup>Department of Medicine, Vanderbilt University Medical Center, Nashville, TN 37232, USA, <sup>575</sup>Department of Pediatrics, Columbia University, New York, NY 10032, USA, <sup>576</sup>Department of Medicine, Columbia University, New York, NY 10032, USA, <sup>577</sup>Division of General Internal Medicine, Department of Internal Medicine, University of Washington School of Medicine, Seattle, WA 98195, USA, <sup>578</sup>Department of Biomedical Informatics, Vanderbilt University Medical Center, Nashville, TN 37232, USA, <sup>579</sup>Vanderbilt Genetics Institute, Vanderbilt University Medical Center, Nashville, TN 37232, USA, <sup>580</sup>Department of Medicine (Endocrinology), Feinberg School of Medicine, Northwestern University, Chicago, IL 60611, USA, <sup>581</sup>Center for Human Genetics, Marshfield Clinic, Marshfield, WI 54449, USA, <sup>582</sup>Department of Biomedical Informatics, Columbia University, New York, NY 10032, USA, <sup>583</sup>Division of Cardiovascular Diseases, Mayo Clinic, Rochester, MN 55905, USA, <sup>584</sup>Department of Pediatrics, University of Cincinnati College of Medicine, Cincinnati, OH 45267, USA, <sup>585</sup>Division of Quantitative Science, Department of Obstetrics and Gynecology, Vanderbilt University Medical Center, Nashville, TN 37230, USA

### **Lifelines Cohort Study**

Raul Aguirre-Gamboa<sup>586</sup>, Patrick Deelen<sup>586</sup>, Lude Franke<sup>586</sup>, Jan A. Kuivenhoven<sup>587</sup>, Esteban A. Lopera Maya<sup>586</sup>, Ilja M. Nolte<sup>41</sup>, Serena Sanna<sup>586</sup>, Harold Snieder<sup>41</sup>, Morris A Swertz<sup>586</sup>, Peter M. Visscher<sup>1,41</sup>, Judith M. Vonk<sup>41</sup>, Cisca Wijmenga<sup>586</sup>

<sup>1</sup>Institute for Molecular Bioscience, The University of Queensland, Brisbane, QLD 4072, Australia, <sup>41</sup>Department of Epidemiology, University of Groningen, University Medical Center Groningen, Groningen, 9700 RB, the Netherlands, <sup>586</sup>Department of Genetics, University of Groningen, University Medical Center Groningen, Groningen, 9700 RB, the Netherlands, <sup>587</sup>Department of Pediatrics, University of Groningen, University Medical Center Groningen, Groningen, 9700 RB, the Netherlands

### **The PRACTICAL Consortium**

Rosalind A. Eeles<sup>489,588</sup>, Zsofia Kote-Jarai<sup>489</sup>, Kenneth R. Muir<sup>589</sup>, Arditaya Lophatananon<sup>589</sup>, Catherine M. Tangen<sup>590</sup>, Phyllis J. Goodman<sup>590</sup>, Ian M. Thompson Jr.<sup>591</sup>, Alicja Wolk<sup>592</sup>, Niclas Håkansson<sup>593</sup>, Demetrius Albanes<sup>15</sup>, Stephanie Weinstein<sup>15</sup>, Nora Pashayan<sup>594,595</sup>, Alison M. Dunning<sup>595</sup>, Maya Ghousaini<sup>596</sup>, Jyotsna Batra<sup>597,598</sup>, Suzanne Chambers<sup>599,600</sup>, Judith A. Clements<sup>597,598</sup>, Lisa Horvath<sup>601,602</sup>, Leire Moya<sup>597,598</sup>, Gail P. Risbridger<sup>603,604</sup>, Wayne Tilley<sup>605</sup>, Sonja I. Berndt<sup>15</sup>, Stephen Chanock<sup>15</sup>, Gerald L. Andriole<sup>606</sup>, Robert N. Hoover<sup>15</sup>, Stella Koutros<sup>15</sup>, Laura Beane Freeman<sup>15</sup>, Florence Menegaux<sup>607</sup>, Thérèse Truong<sup>607</sup>, Christopher A. Haiman<sup>339</sup>, Fredrick R. Schumacher<sup>167,608</sup>, Loic Le Marchand<sup>391</sup>, Xin Sheng<sup>339</sup>, Robert J. MacInnis<sup>609,610</sup>, Melissa C. Southey<sup>609,611,612</sup>, Graham G. Giles<sup>609,610,611</sup>, Roger L. Milne<sup>609,610,611</sup>, Robert J. Hamilton<sup>613,614</sup>, Antonio Finelli<sup>615</sup>, Manolis Kogevinas<sup>616,617,618</sup>, Javier Llorca<sup>619,620</sup>, Gemma Castaño-Vinyals<sup>616,617,618</sup>, Antonio Alcaraz<sup>621</sup>, Olivier Cussenot<sup>622,623</sup>, Géraldine Cancel-Tassin<sup>622,623</sup>, Janet L. Stanford<sup>110,435</sup>, Elaine A. Ostrander<sup>624</sup>, Adam S. Kibel<sup>625</sup>, Bettina F. Drake<sup>626</sup>, Hermann Brenner<sup>627,628,629</sup>, Xin Gao<sup>627</sup>, Bernd Holleccek<sup>630</sup>, Ben Schöttker<sup>627</sup>, Esther M. John<sup>631</sup>, Jong Y. Park<sup>632</sup>, Hui-Yi Lin<sup>633</sup>, Nawaid Usmani<sup>634,635</sup>, Matthew Parliament<sup>634,635</sup>, Aswin Abraham<sup>634</sup>, Susan L. Neuhausen<sup>636</sup>, Yuan Chun Ding<sup>636</sup>, Linda Steele<sup>636</sup>, Jose Esteban Castelao<sup>637</sup>, Manuela Gago-Dominguez<sup>638,639</sup>, Maria Elena Martinez<sup>639</sup>, Frank Claessens<sup>640</sup>, Steven Joniau<sup>641</sup>, Thomas Van den Broeck<sup>640,641</sup>, Christiane Maier<sup>642</sup>, Manuel Luedeke<sup>643</sup>, Thomas Schnoeller<sup>644</sup>, Marija Gamulin<sup>645</sup>, Davor Lesell<sup>646</sup>, Tomislav Kulis<sup>647</sup>

<sup>15</sup>Division of Cancer Epidemiology and Genetics, National Cancer Institute, Rockville, MD 20850, USA, <sup>110</sup>Division of Public Health Sciences, Fred Hutchinson Cancer Research Center, Seattle, WA 98109, USA, <sup>167</sup>Department of Population and Quantitative Health Sciences, Case Western Reserve University, Cleveland, OH 44106, USA, <sup>339</sup>Department of Preventive Medicine, Keck School of Medicine of USC, Los Angeles, CA 90089, USA, <sup>391</sup>Epidemiology Program, University of Hawaii Cancer Center, Honolulu, HI 96813, USA, <sup>435</sup>Department of Epidemiology, University of Washington, Seattle, WA 98195, USA, <sup>489</sup>The Institute of Cancer Research, London, SM2 5NG, UK, <sup>595</sup>Centre for Cancer Genetic Epidemiology,

Department of Oncology, University of Cambridge, Strangeways Laboratory, Cambridge, CB1 8RN, UK, <sup>596</sup>Open Targets, Wellcome Sanger Institute, Hinxton, Saffron Walden, CB10 1SA, UK, <sup>597</sup>Australian Prostate Cancer Research Centre-Qld, Institute of Health and Biomedical Innovation and School of Biomedical Sciences, Queensland University of Technology, Brisbane QLD 4059, Australia, <sup>598</sup>Translational Research Institute, Brisbane, QLD 4102, Australia, <sup>599</sup>Faculty of Health Sciences, Australian Catholic University, Banyo ALD 4014, Australia, <sup>600</sup>Cancer Council Queensland, Fortitude Valley, QLD 4006, Australia, <sup>601</sup>Chris O'Brien Lifehouse (COBLH), Camperdown, Sydney, NSW 2010, Australia, <sup>602</sup>Garvan Institute of Medical Research, Sydney NSW 2010, Australia, <sup>603</sup>Department of Anatomy and Developmental Biology, Biomedicine Discovery Institute, Monash University, Melbourne, Victoria 3800, Australia, <sup>604</sup>Prostate Cancer Translational Research Program, Cancer Research Division, Peter MacCallum Cancer Centre, Melbourne, VIC 3000, Australia, <sup>605</sup>Dame Roma Mitchell Cancer Research Laboratories, University of Adelaide, Adelaide, South Australia, Australia, <sup>606</sup>Department of Medicine, Washington University School of Medicine, St. Louis, MO 63110, USA, <sup>607</sup>"Exposome and Heredity", CESP (UMR 1018), Faculté de Médecine, Université Paris-Saclay, Inserm, Gustave Roussy, Villejuif, France, <sup>608</sup>Seidman Cancer Center, University Hospitals, Cleveland, OH 44106, USA, <sup>609</sup>Cancer Epidemiology Division, Cancer Council Victoria, Melbourne, VIC 3004, Australia, <sup>610</sup>Centre for Epidemiology and Biostatistics, Melbourne School of Population and Global Health, The University of Melbourne, Parkville, VIC 3010, Australia, <sup>611</sup>Precision Medicine, School of Clinical Sciences at Monash Health, Monash University, Clayton, VIC 3168, Australia, <sup>612</sup>Department of Clinical Pathology, The Melbourne Medical School, The University of Melbourne, Melbourne, VIC 3010, Australia, <sup>613</sup>Dept. of Surgical Oncology, Princess Margaret Cancer Centre, Toronto, ON M5G 2M9, Canada, <sup>614</sup>Dept. of Surgery (Urology), University of Toronto, Toronto, ON M5G 2M9, Canada, <sup>615</sup>Division of Urology, Princess Margaret Cancer Centre, Toronto, ON M5G 2M9, Canada, <sup>616</sup>ISGlobal, 08036 Barcelona, Spain, <sup>617</sup>IMIM (Hospital del Mar Medical Research Institute), 08003 Barcelona, Spain, <sup>618</sup>Universitat Pompeu Fabra (UPF), 08002 Barcelona, Spain, <sup>619</sup>University of Cantabria, 39005 Santander, Spain, <sup>620</sup>CIBER Epidemiología y Salud Pública (CIBERESP), 28029 Madrid, Spain, <sup>621</sup>Department and Laboratory of Urology, Hospital Clínic, Institut d'Investigacions Biomèdiques August Pi i Sunyer (IDIBAPS), Universitat de Barcelona, 08036 Barcelona, Spain, <sup>622</sup>Sorbonne Université, GRC n°5, AP-HP, Tenon Hospital, F-75020 Paris, France, <sup>623</sup>CeRePP, Tenon Hospital, F-75020 Paris, France., <sup>624</sup>National Human Genome Research Institute, National Institutes of Health, Bethesda, MD 20892, USA, <sup>625</sup>Division of Urologic Surgery, Brigham and Womens Hospital, Boston, MA 02115, USA, <sup>626</sup>Department of Surgery, Washington University School of Medicine, St. Louis, MO 63110, USA, <sup>627</sup>Division of Clinical Epidemiology and Aging Research, German Cancer Research Center (DKFZ), D-69120, Heidelberg, Germany, <sup>628</sup>German Cancer Consortium (DKTK), German Cancer Research Center (DKFZ), D-69120 Heidelberg, Germany, <sup>629</sup>Division of Preventive Oncology, German Cancer Research Center (DKFZ) and National Center for Tumor Diseases (NCT), 69120 Heidelberg, Germany, <sup>630</sup>Saarland Cancer Registry, 66119 Saarbrücken, Germany, <sup>631</sup>Departments of Epidemiology & Population Health and of Medicine, Division of Oncology, Stanford Cancer Institute, Stanford University School of Medicine, Stanford, CA 94304, USA, <sup>632</sup>Department of Cancer Epidemiology, Moffitt Cancer Center, Tampa, FL 33612, USA, <sup>633</sup>School of Public Health, Louisiana State University Health Sciences Center, New Orleans, LA 70112, USA, <sup>634</sup>Department of Oncology, Cross Cancer Institute, University of Alberta, Edmonton, Alberta T6G 1Z2, Canada, <sup>635</sup>Division of Radiation Oncology, Cross Cancer Institute, University of Alberta, Edmonton, Alberta T6G 1Z2, Canada, <sup>636</sup>Department of Population Sciences, Beckman Research Institute of the City of Hope, Duarte, CA 91010, USA, <sup>637</sup>Genetic Oncology Unit, CHUVI Hospital, Complejo Hospitalario Universitario de Vigo, Instituto de Investigación Biomédica Galicia Sur (IISGS), 36204, Vigo (Pontevedra), Spain, <sup>638</sup>Genomic Medicine Group, Galician Foundation of Genomic Medicine, Instituto de Investigación Sanitaria de Santiago de Compostela (IDIS), Complejo Hospitalario Universitario de Santiago, Servicio Galego de Saúde, SERGAS, 15706, Santiago de Compostela, Spain, <sup>639</sup>University of California San Diego, Moores Cancer Center, Department of Family Medicine and Public Health, University of California San Diego, La Jolla, CA 92093, USA, <sup>640</sup>Molecular Endocrinology Laboratory, Department of Cellular and Molecular Medicine, KU Leuven, BE-3000, Belgium, <sup>641</sup>Department of Urology, University Hospitals Leuven, BE-3000 Leuven, Belgium, <sup>642</sup>Humangenetik Tuebingen, D-72076 Tuebingen, Germany, <sup>643</sup>genetikum, D-89231 Neu-Ulm, Germany, <sup>644</sup>Department of Urology, University

Hospital Ulm, Ulm, Germany, <sup>645</sup>Department of Oncology, University Hospital Centre Zagreb, University of Zagreb, School of Medicine, 10 000 Zagreb, Croatia, <sup>646</sup>Institute of Human Genetics, University Medical Center Hamburg-Eppendorf, D-20246 Hamburg, Germany, <sup>647</sup>Department of Urology, University Hospital Center Zagreb, University of Zagreb School of Medicine, 10 000 Zagreb, Croatia

### **Understanding Society Scientific Group**

Michaela Benzeval<sup>387</sup>, Jonathan Burton<sup>387</sup>, Nicholas Buck<sup>387</sup>, Annette Jäckle<sup>387</sup>, Meena Kumari<sup>387</sup>, Heather Laurie<sup>387</sup>, Peter Lynn<sup>387</sup>, Stephen Pudney<sup>387</sup>, Birgitta Rabe<sup>387</sup>, Dieter Wolke<sup>648</sup>

<sup>387</sup>Institute for Social and Economic Research, University of Essex, Wivenhoe Park CO4 3SQ, UK,

<sup>648</sup>Division of Health Science, Warwick Medical School, University of Warwick, Coventry CV4 7AL, UK

## SUPPLEMENTARY FIGURES

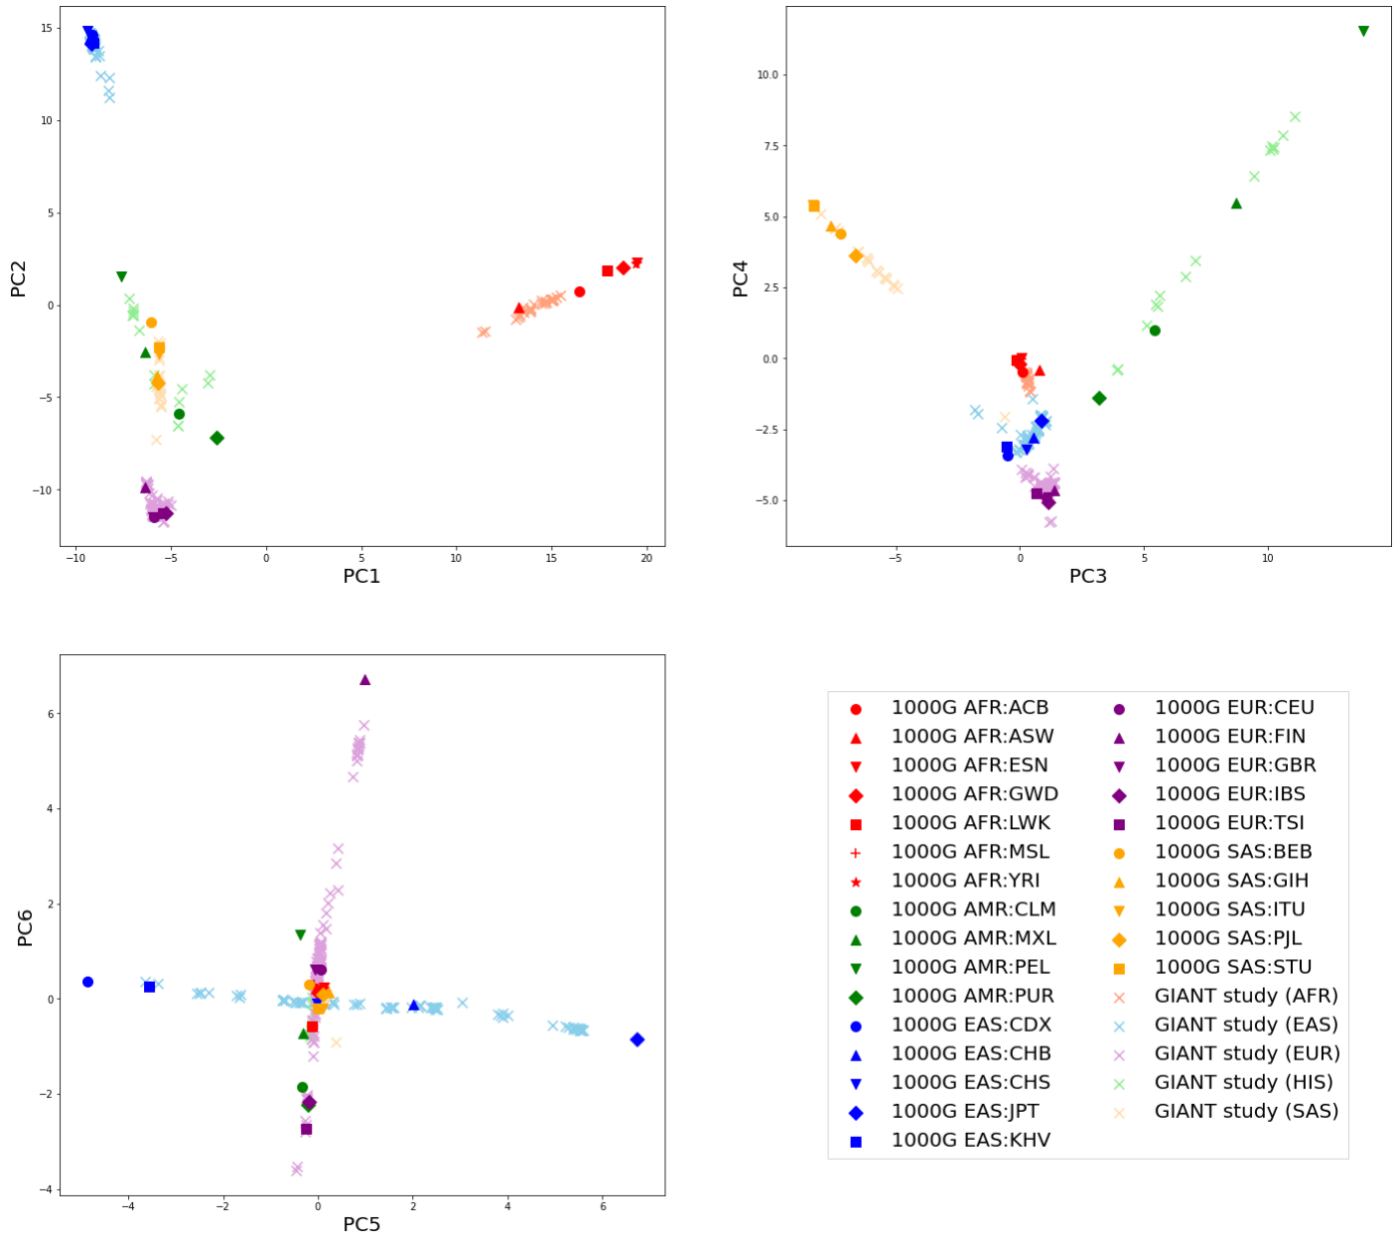

**Suppl. Fig. 1. Principal components analysis of contributing studies to the height meta-analysis alongside 26 genetic ancestry groups from the 1000 Genomes Project.** Using data from 2,504 samples from the 1000 Genomes Project (1KGP), genotypes for 354,568 HapMap3 SNPs with frequency data from all participating studies were extracted. LD-pruning was subsequently performed using PLINK with a window size of 1Mb, a shift size of 50 variants, and an LD  $r^2$  cut-off of 0.1 (PLINK command: `--indep-pairwise 1000 50 0.1`). After LD-pruning, 18,125 SNPs remained for subsequent analysis. Allele frequencies for the pruned set of variants were subsequently calculated within each of the 26 1KGP ancestral groups and aligned to the same reference allele. Principal components analysis was subsequently performed by using the 1KGP frequency data to build the model prior to projection of participating studies, having ensured study allele frequencies were also aligned to the same 1KGP reference allele.

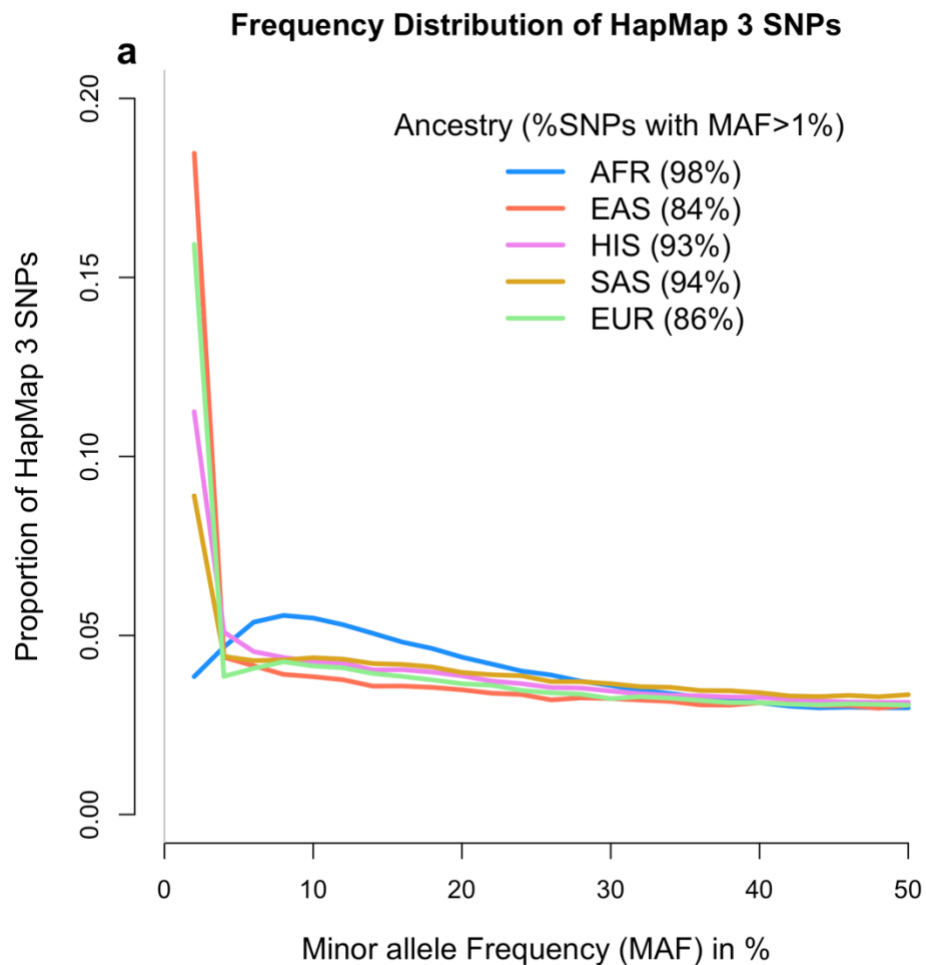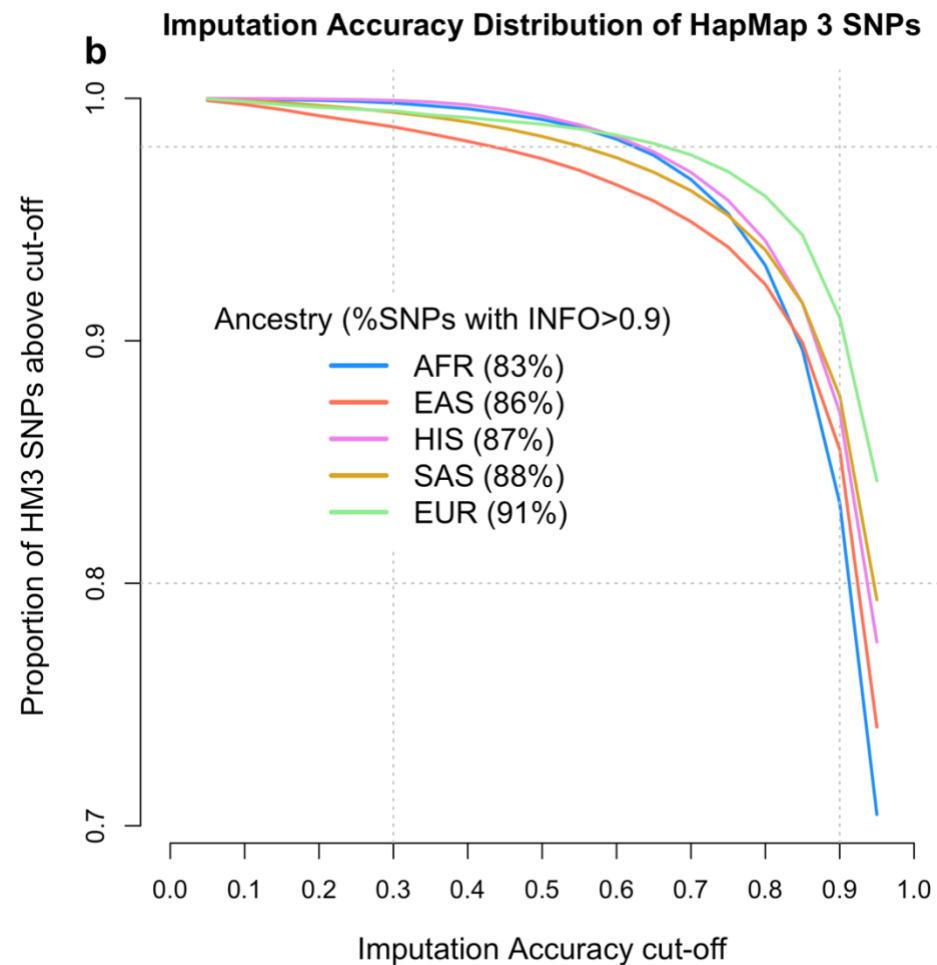

**Suppl. Fig. 2. Frequency and imputation accuracy distribution of HapMap 3 SNPs across ancestry groups. Panel a.** Minor allele frequency (MAF) distribution of HapMap 3 SNPs across 5 ancestries: European (EUR), Hispanic (HIS), African (AFR), East-Asian (EAS) and South-Asian (SAS). **Panel b.** Average (across cohorts) proportion (y-axis) of HapMap 3 SNPs with a imputation accuracy statistic (INFO) above a certain threshold (x-axis). Vertical lines highlight two thresholds (0.3 and 0.9) commonly used to ascertain SNPs on imputation accuracy. Overall, **Panel b** shows that HapMap 3 SNPs are well imputed across all ancestry groups with >98% of SNPs with INFO>0.3 and >80% of SNPs with INFO>0.9.

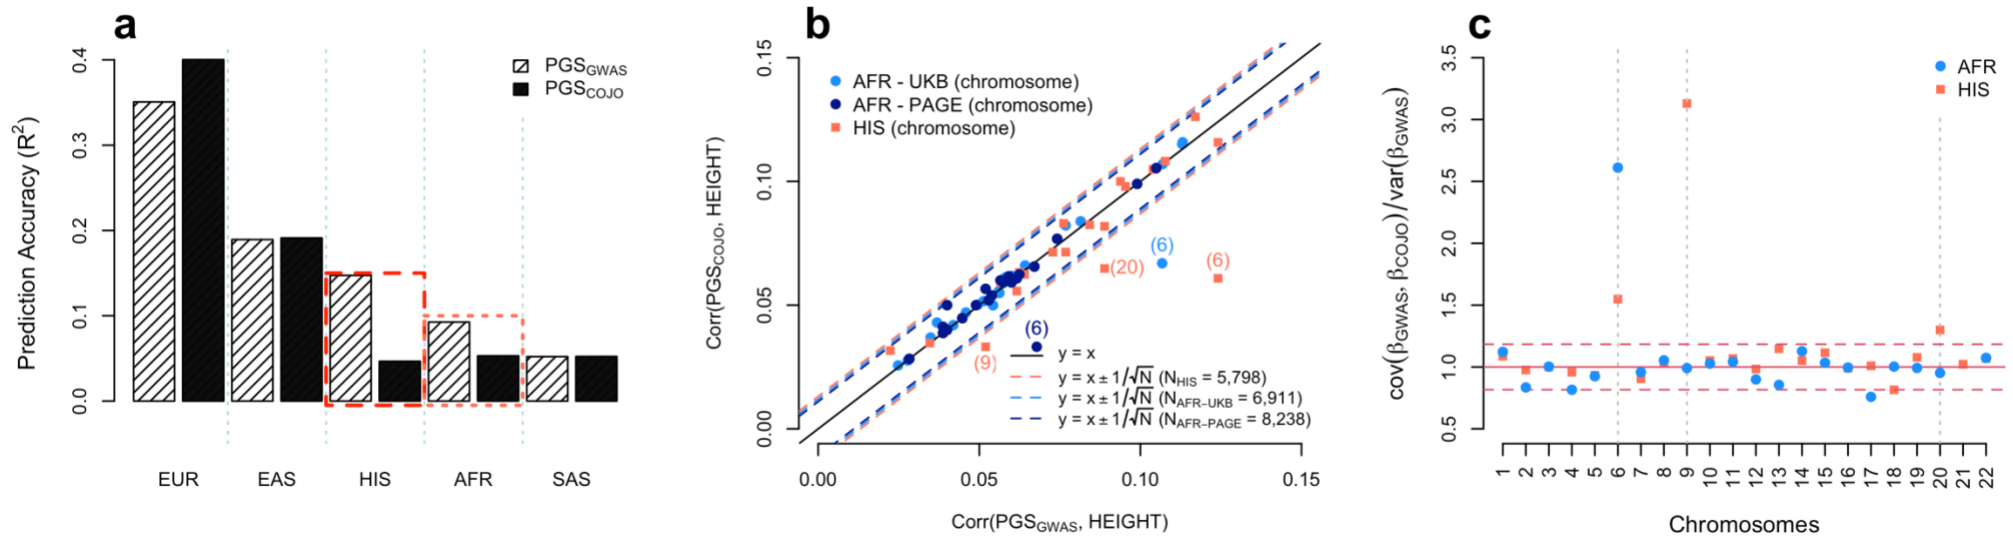

**Suppl. Fig. 3. Biases in conditional and joint effect estimates.** **Panel a:** Prediction accuracy (squared correlation  $R^2$ ) of polygenic scores (PGS) based on genome-wide significant (GWS) SNPs identified in 5 ancestry groups (EUR: European, EAS: East-Asian, HIS: Admixed Hispanic ethnicity, AFR: African (mostly Admixed African American) and SAS: South-Asian). For each set of GWS SNPs, Panel a compares the prediction accuracy obtained when the PGS is calculated from marginal SNP effects ( $PGS_{GWAS}$ ) versus when the PGS is calculated from joint SNP effects ( $PGS_{COJO}$ ) estimated with the GCTA-COJO algorithm using default parameters. In ancestry groups, except HIS and AFR, the accuracy of  $PGS_{COJO}$  is larger than that of  $PGS_{GWAS}$ . **Panel b** contrasts the per-chromosome correlation between  $PGS_{GWAS}$  and height (x-axis) with the per-chromosome correlation between  $PGS_{COJO}$  and height (y-axis). These correlations were calculated in 2 samples of African ancestry participants from the UK Biobank (UKB,  $N_{AFR-UKB}=6,911$ ) and the PAGE study ( $N_{AFR-PAGE}=8,238$ ) and in 1 sample of Admixed Hispanic individuals also from the PAGE study ( $N_{HIS-PAGE}=5,798$ ). **Panel c** represents for each chromosome (x-axis) the slope from regressing marginal SNP effects on joint SNP effects (y-axis). Regression slopes were estimated for GWS SNPs identified on each chromosome in GWAS meta-analyses in African and Hispanic ancestry groups. These results are further described and discussed in **Suppl. Note 1**.



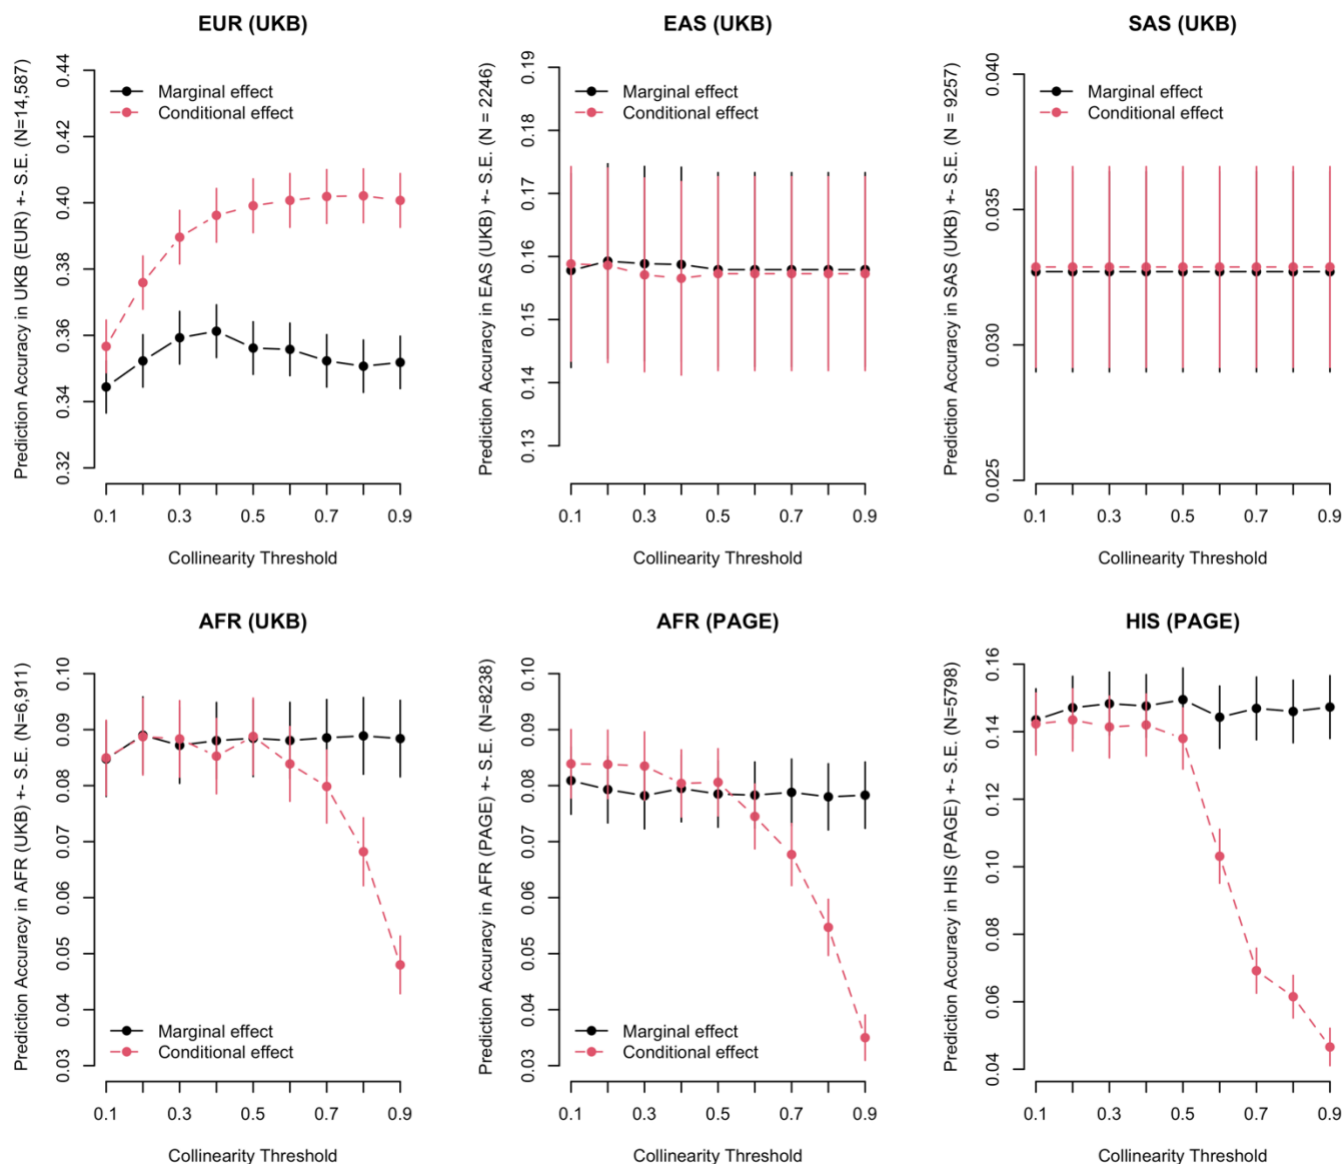

**Suppl. Fig. 4. Impact of the collinearity threshold (CT) used in the GCTA-COJO algorithm on prediction accuracy of polygenic scores (PGS) based using estimates joint effects.** By default, the GCTA-COJO algorithm implements a stepwise model selection to identify sets of jointly significant SNPs such that the variance of genotypes at any SNP retained in the final model is not explained at more than CT=90% by other SNPs included in the model. We varied the value of the CT between 0.9 (least stringent) and 0.1 (most stringent) and monitored the prediction accuracy of PGS in different samples. Each panel represents CT on the x-axis and the prediction accuracy on the y-axis in a given ancestry group match with the ancestry of GWAS participants. Red dots represent prediction accuracies of PGS calculated from joint effects ( $PGS_{COJO}$ ) and black that from marginal effects ( $PGS_{GWAS}$ ). Overall, using stringent CT values tend to degrade the performances of  $PGS_{COJO}$  in all ancestry groups (EUR: European, EAS: East-Asian and SAS: South-Asian) except in admixed individuals with African ancestries (AFR) and of Hispanic ethnicity (HIS). These results are further described and discussed in **Suppl. Note 1**.

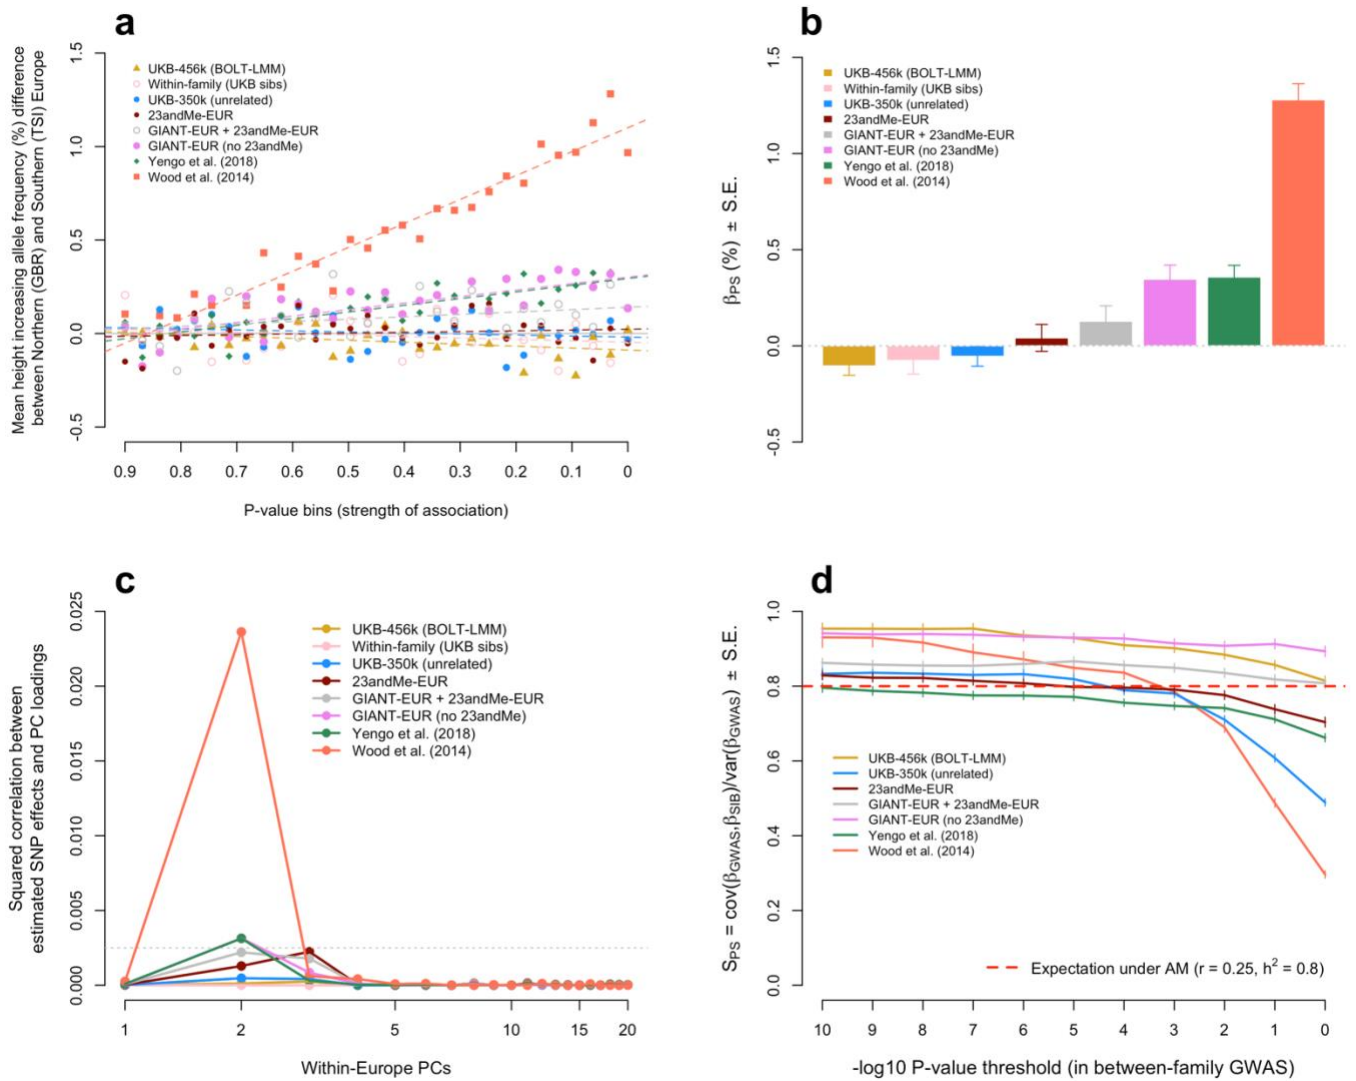

**Suppl. Fig. 5. Quantification of confounding due to population stratification (PS) in various European ancestry (EUR) GWAS of height.** UKB-456k (BOLT-LMM): GWAS in 456,414 EUR participants of the UKB. UKB-350k (unrelated): GWAS in 348,501 unrelated (i.e. estimated genetic relatedness  $<0.05$ ) EUR participants of UKB. 23andMe-EUR: GWAS in EUR participants of 23andMe. GIANT-EUR: GWAS meta-analysis of 173 EUR cohorts from the GIANT consortium. Within-family (UKB): Family-based GWAS performed in 17,942 independent EUR sibling pairs from the UKB. **Panel a** represents the relationship between strength of association between 101,360 independent ( $LD r^2 < 0.1$ ) HM3 SNPs and height (x-axis: 30 SNP bins) and height-increasing allele frequency differences between the British (GBR) and Tuscan (TSI) samples from the 1,000 Genomes Project (1KGP). A significant slope ( $\beta_{PS}$ ) indicates uncorrected PS. **Panel b** shows estimates of  $\beta_{PS}$  for different GWAS and their associated leave-one-SNP-bin-out jackknife standard errors (S.E.). **Panel c** shows the variance in estimated SNP effects from various height GWAS that is explained by SNP loading on genotypic principal components (PC) calculated among 503 EUR samples from the 1KGP. The x-axis in **Panel c** indicates number of vectors of PC loadings including in the regression model (SNP effect regressed on PC loading). **Panel d** shows on the y-axis the slope ( $S_{PS} = \text{cov}(\beta_{GWAS}, \beta_{SIB}) / \text{var}(\beta_{GWAS})$ ) from regressing SNP effects estimated in a family-based GWAS ( $\beta_{SIB}$ ) onto SNP effects estimated in a standard population-based GWAS ( $\beta_{GWAS}$ ). The x-axis in **Panel d** is the  $-\log_{10}$  of the p-value threshold used to ascertain SNPs for estimating the regression slope. For each p-value threshold, the effects of ascertained SNPs were corrected for winner's curse (**Methods**). The horizontal red dotted line represented the expected slope under assortative mating (AM) assuming an equilibrium heritability  $h^2 = 0.8$  and a spousal correlation  $r = 0.25$  (**Suppl. Note 2**).

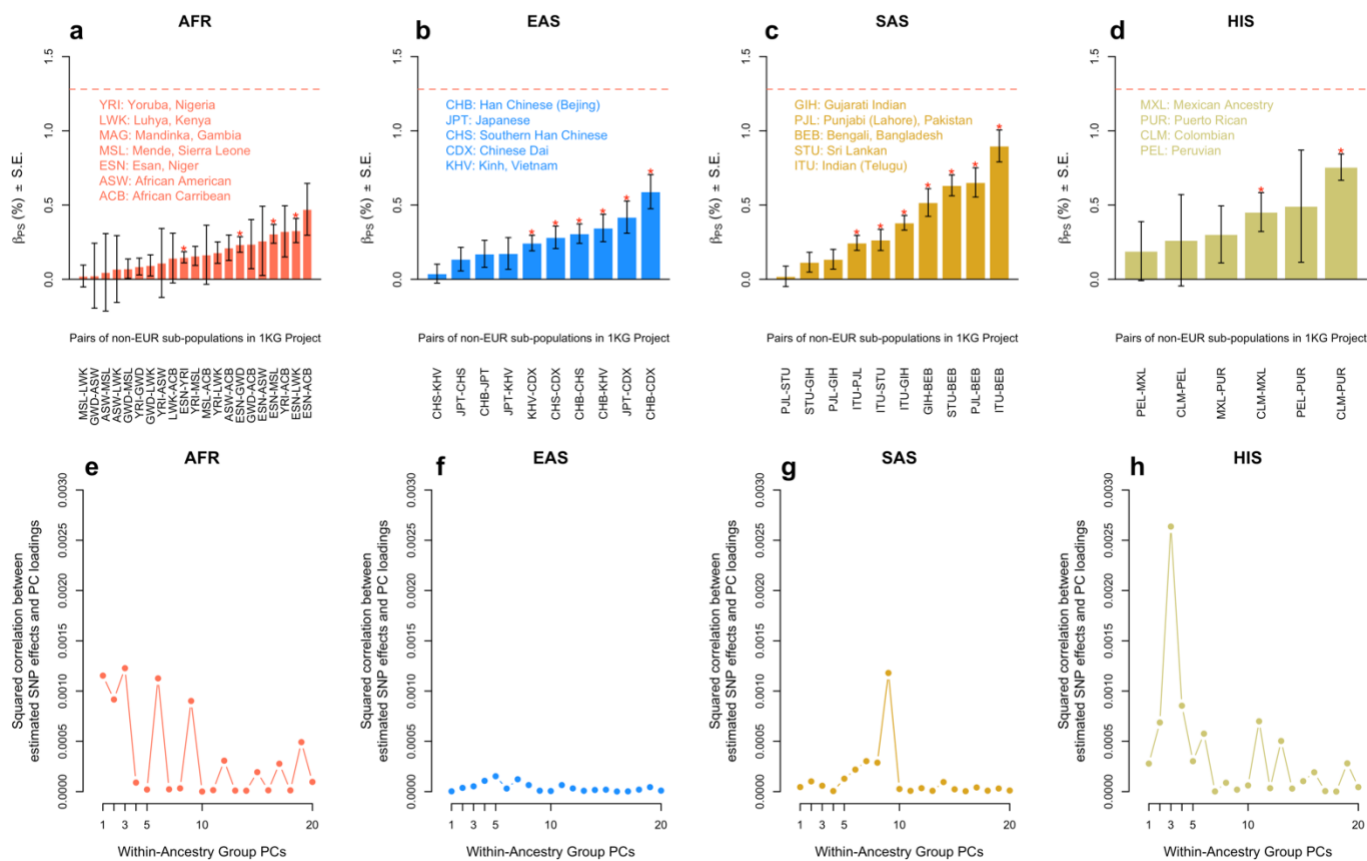

**Suppl. Fig. 6. Quantification of confounding due to population stratification (PS) in various non-European ancestry (non-EUR) GWAS of height.** Panels **a** and **e**, **b** and **f**, **c** and **g**, **d** and **h** represent quantifications of PS in GWAS conducted in individuals from the African (AFR), East-Asian (EAS), South-Asian (SAS) and Hispanic (HIS) ancestry groups, respectively. The x-axes in all the top panels (**a – d**) represent pairs of subpopulations in the 1000 Genomes Project (1KG) within the corresponding ancestry groups. The y-axes in Panels (**a – d**) show estimates of  $\beta_{PS}$  (+/- standard errors; S.E.) for SNP effects estimated in the corresponding ancestry group along axes of genetic differentiation between subpopulations indicated on the x-axis. Red dots on top of each bar indicate statistical significance as defined in **Suppl. Note 2** based on different thresholds according to the number of pairs of subpopulation within ancestry groups. The x-axes in all the bottom panels (**e – h**) correspond to 20 principal components (PC) calculated in 1KGP samples from the corresponding ancestry group. The y-axes in Panels **e – h** show the squared correlations between PC loadings and marginal SNP effects in the corresponding ancestry-specific GWAS meta-analysis. These results are further described and discussed in **Suppl. Note 2**.

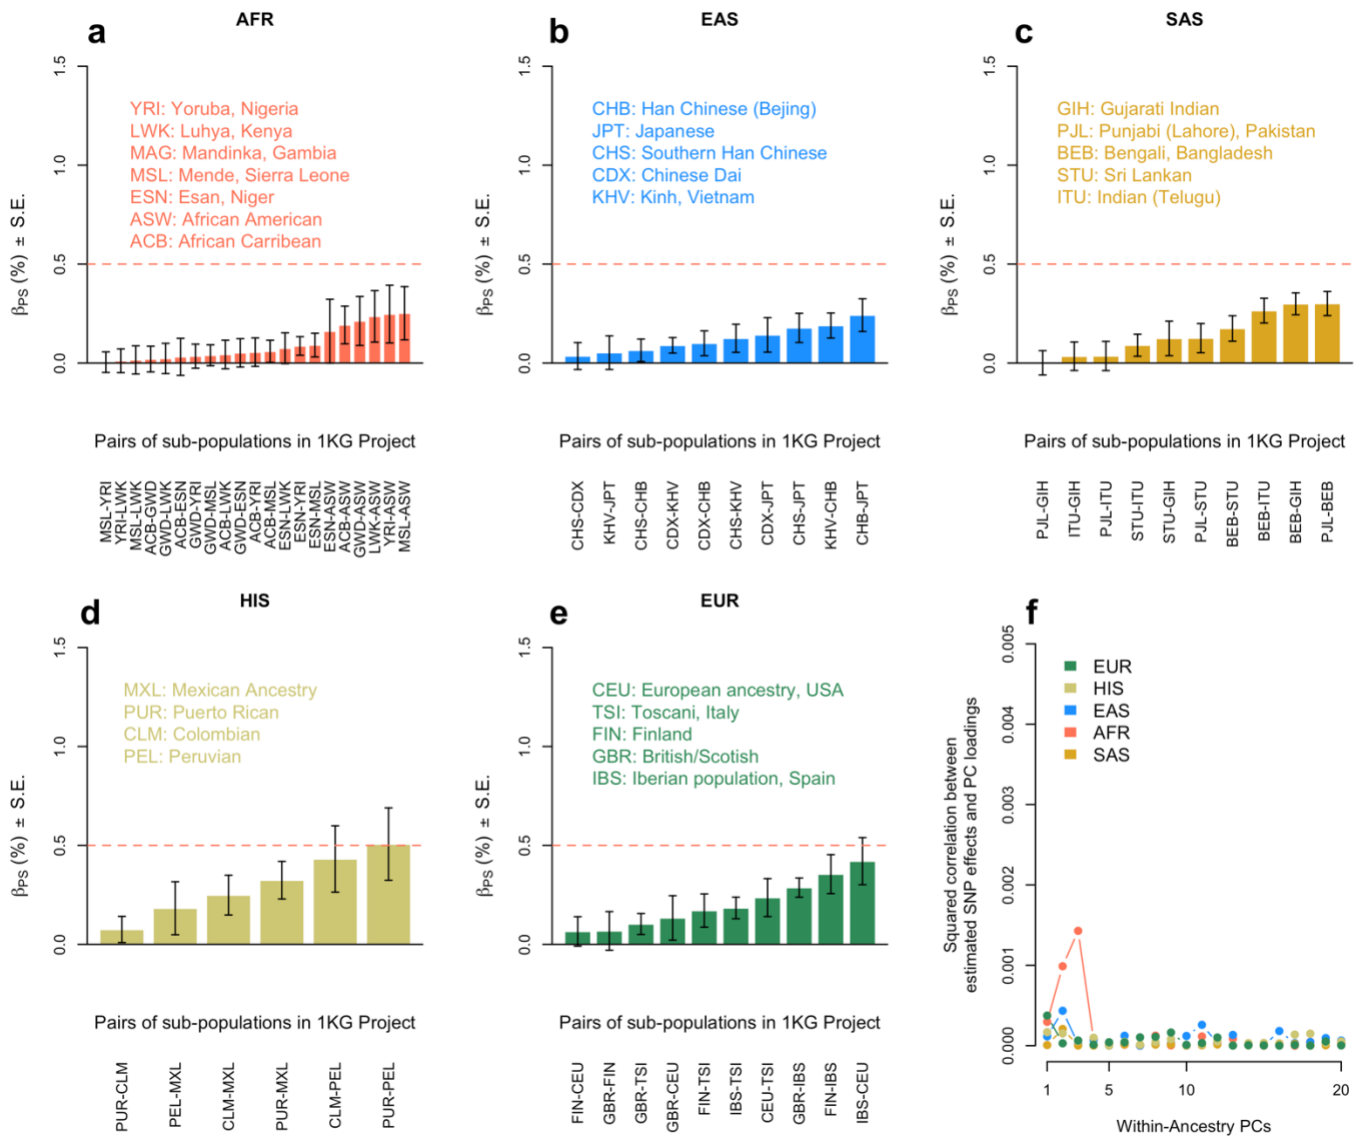

**Suppl. Fig. 7. Quantification of confounding due to population stratification (PS) in our cross-ancestry GWAS meta-analysis of height.** The x-axis in panels (a – e) shows pairs of subpopulations in the 1000 Genomes Project (1KG) within 5 ancestry groups indicated by the title of the panel (African: AFR, East-Asian: EAS, South-Asian: SAS, HIS: Hispanic, European: EUR). The y-axis in panels (a – e) shows estimates of  $\beta_{PS}$  (+/- standard errors; S.E.) for SNP effects in our cross-ancestry meta-analysis along axes of genetic differentiation between subpopulations indicated on the x-axis. Each dot in **Panel f** represents the squared correlation (y-axis) between SNP effects and loadings of principal components (PC: 1 to 20, indicated on the x-axis) calculated in 5 ancestry groups indicated in the panel legend. These results are further described and discussed in **Suppl. Note 2**.

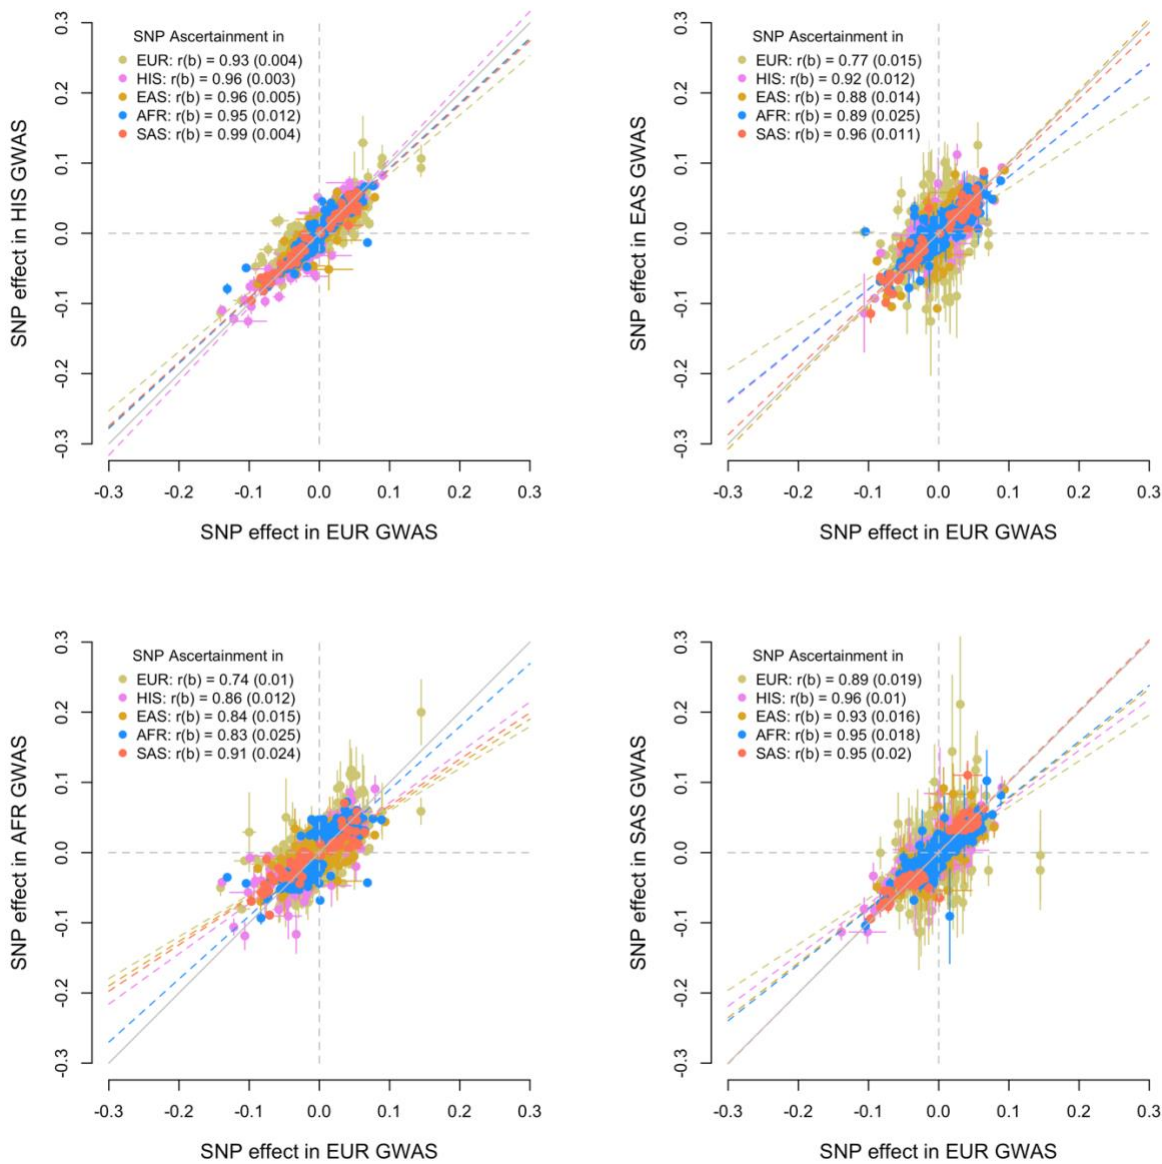

**Suppl. Fig. 8. Correlation of marginal SNP effects between European ancestry (EUR, on the x-axis) and non-EUR GWAS** (i.e. Hispanic (HIS), African (AFR), East-Asian (EAS) and South-Asian (SAS) on the y-axis). Correlations  $r(b)$  were corrected for estimation errors as described in the **Methods** section. Each estimate of the correlation of SNP effect is based on SNPs reaching marginal genome-wide significance in any of the 5 ancestries analysed. Standard errors for  $r(b)$  were obtained using jackknife. Error bars denote standard errors of SNP effects.

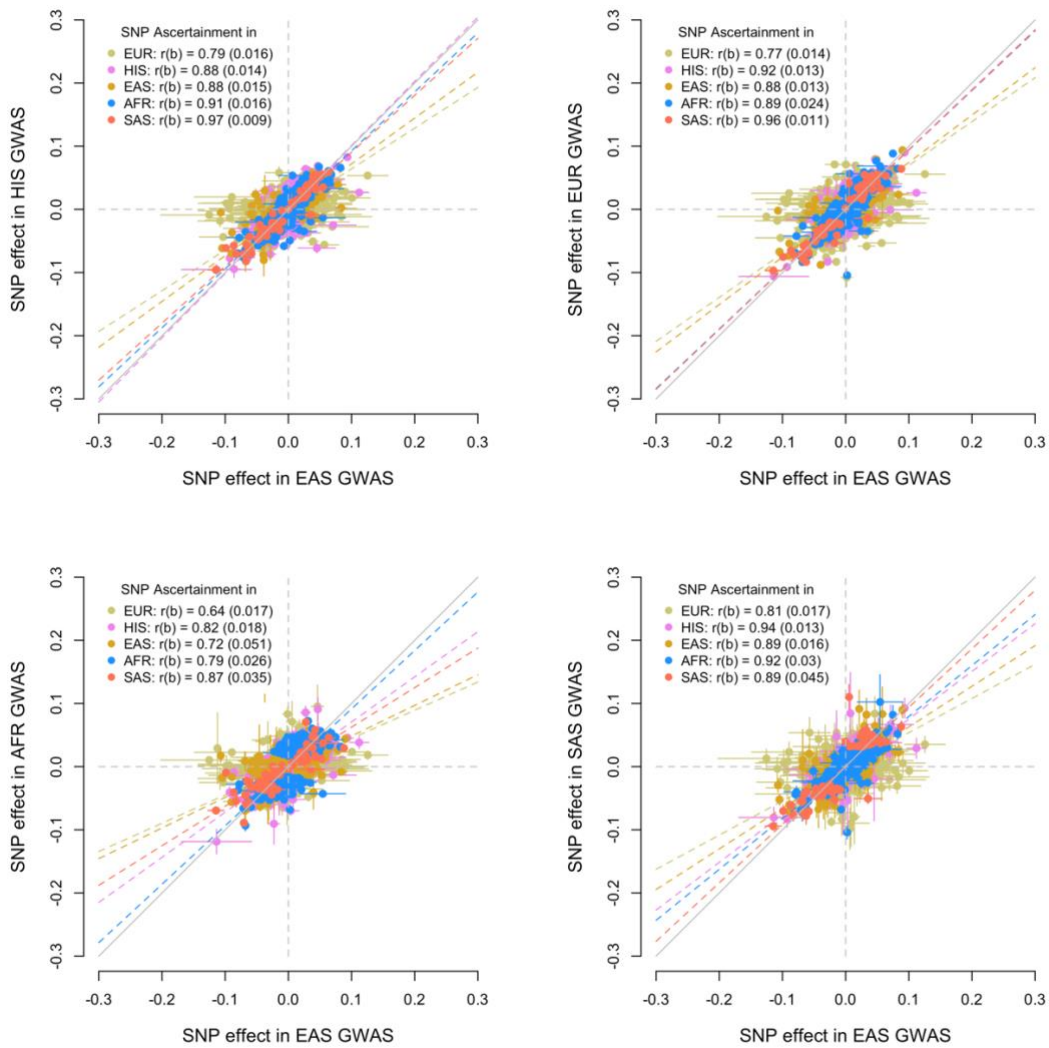

**Suppl. Fig. 9. Correlation of marginal SNP effects between East-Asian ancestry (EAS, on the x-axis) and non-EAS GWAS (i.e. Hispanic (HIS), African (AFR), European (EUR) and South-Asian (SAS) on the y-axis).** Correlations  $r(b)$  were corrected for estimation errors as described in the **Methods** section. Each estimate of the correlation of SNP effect is based on SNPs reaching marginal genome-wide significance in any of the 5 ancestries analysed. Standard errors for  $r(b)$  were obtained using jackknife. Error bars denote standard errors of SNP effects.

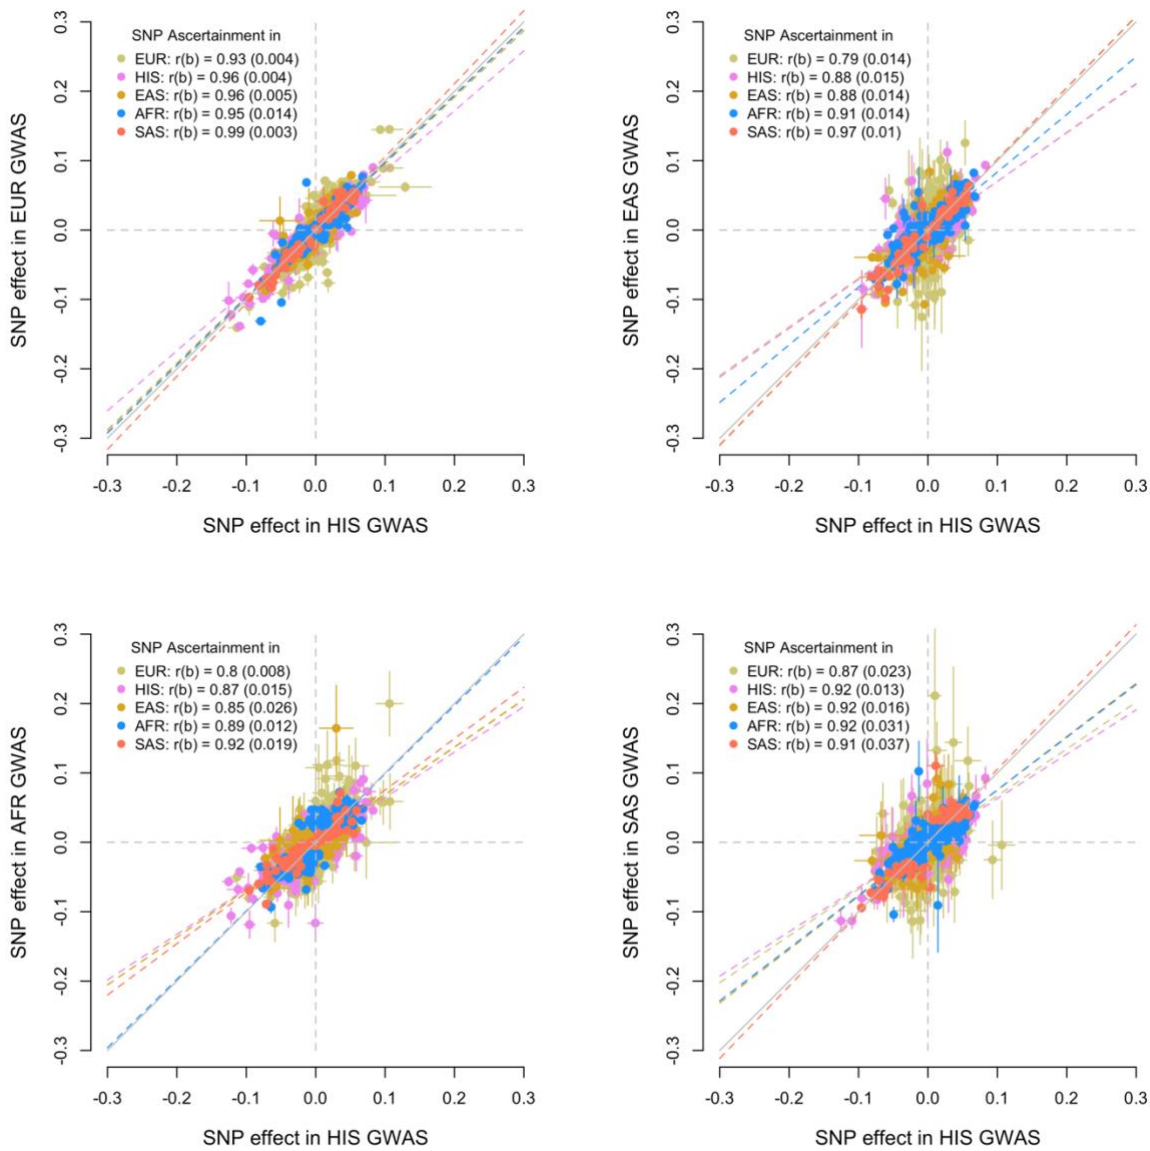

**Suppl. Fig. 10. Correlation of marginal SNP effects between Hispanic ethnicity (HIS, on the x-axis) and non-HIS GWAS (i.e. European (EUR), African (AFR), East-Asian (EAS) and South-Asian (SAS) on the y-axis).** Correlations  $r(b)$  were corrected for estimation errors as described in the **Methods** section. Each estimate of the correlation of SNP effect is based on SNPs reaching marginal genome-wide significance in any of the 5 ancestries analysed. Standard errors for  $r(b)$  were obtained using jackknife. Error bars denote standard errors of SNP effects.

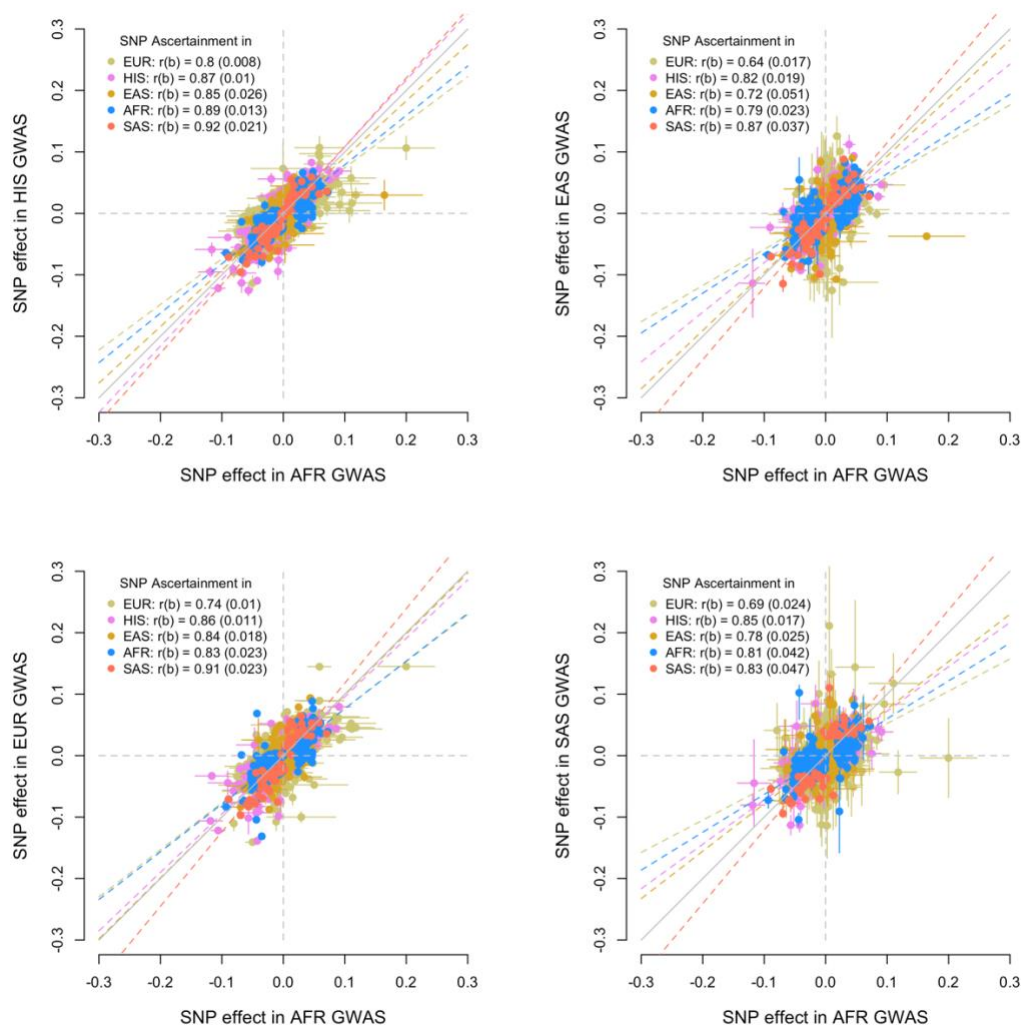

**Suppl. Fig. 11. Correlation of marginal SNP effects between African ancestry (AFR, on the x-axis) and non-AFR GWAS (i.e. Hispanic (HIS), European (EUR), East-Asian (EAS) and South-Asian (SAS) on the y-axis).** Correlations  $r(b)$  were corrected for estimation errors as described in the **Methods** section. Each estimate of the correlation of SNP effect is based on SNPs reaching marginal genome-wide significance in any of the 5 ancestries analysed. Standard errors for  $r(b)$  were obtained using jackknife. Error bars denote standard errors of SNP effects. Error bars denote standard errors of SNP effects.



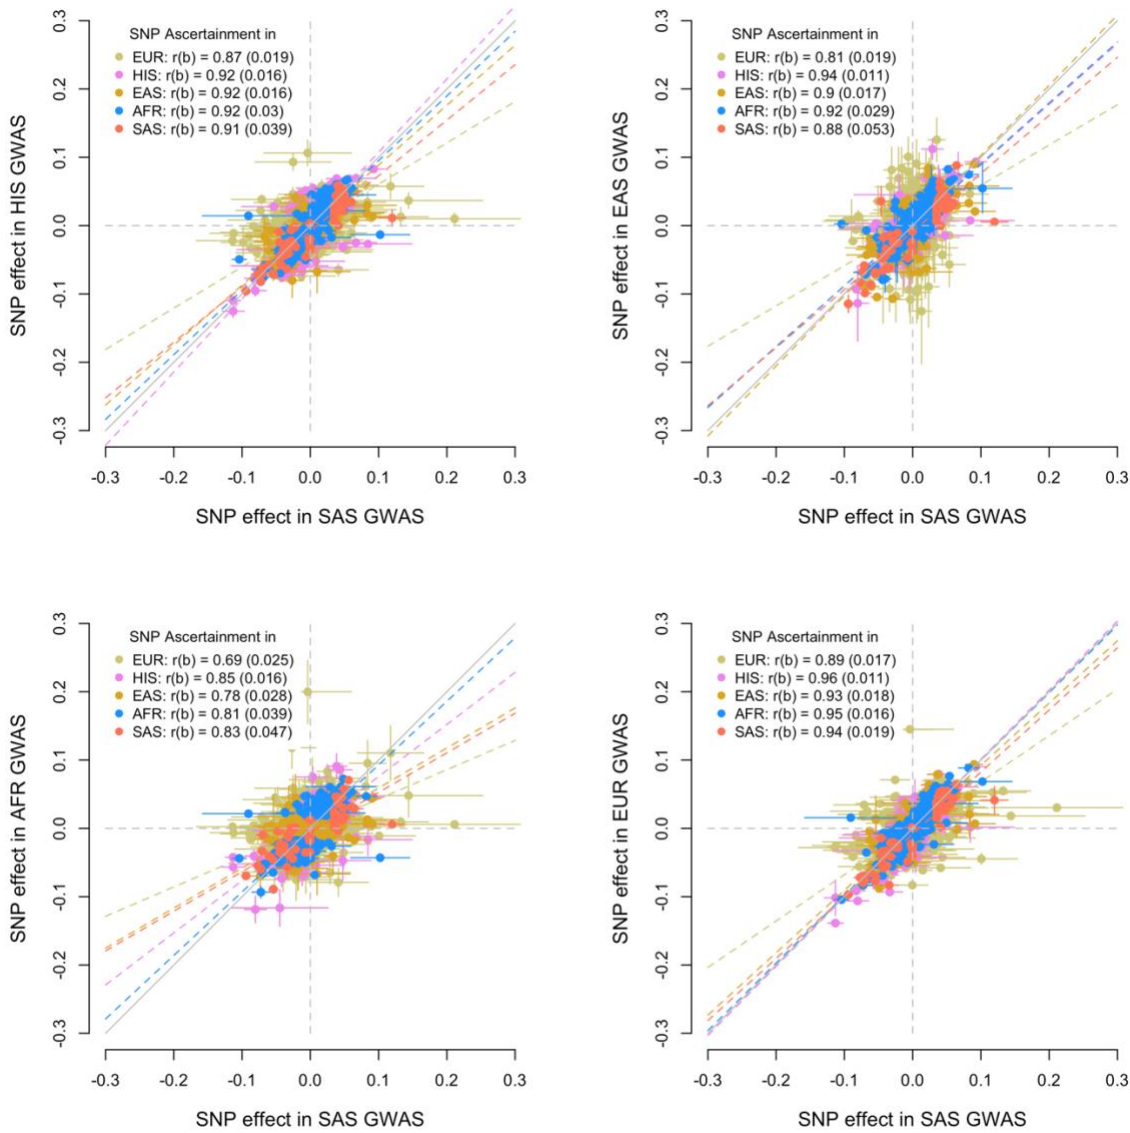

**Suppl. Fig. 12. Correlation of marginal SNP effects between South-Asian ancestry (SAS, on the x-axis) and non-SAS GWAS (i.e. Hispanic (HIS), African (AFR), East-Asian (EAS) and European (EUR) on the y-axis).** Correlations  $r(b)$  were corrected for estimation errors as described in the **Methods** section. Each estimate of the correlation of SNP effect is based on SNPs reaching marginal genome-wide significance in any of the 5 ancestries analysed. Standard errors for  $r(b)$  were obtained using jackknife. Error bars denote standard errors of SNP effects.

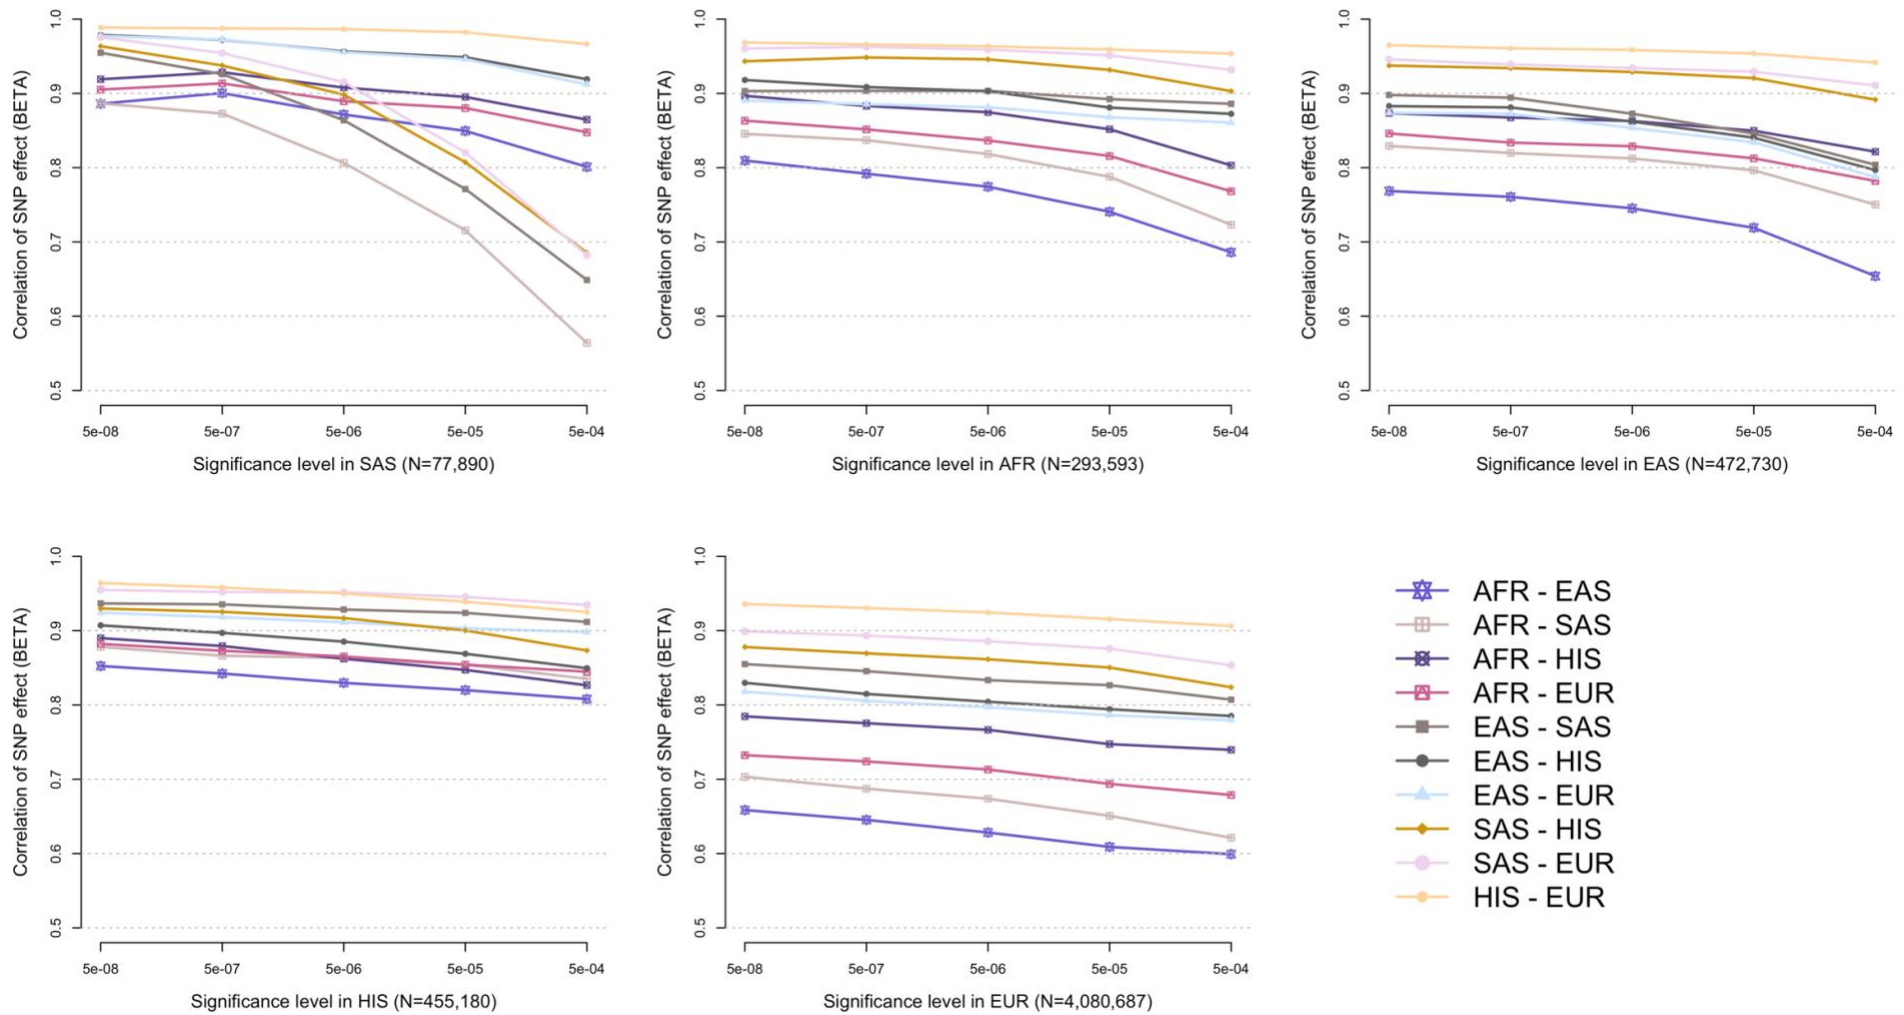

**Suppl. Fig. 13. Cross-ancestry correlation of marginal SNP effects ascertained at various significant thresholds.** The x-axis in each panel represents significance thresholds used to ascertain SNPs and the y-axis the correlation  $r(b)$  of estimated marginal effects (**Methods**) across 10 pairs of GWAS performed in 5 ancestry groups (African: AFR, East-Asian: EAS, South-Asian: SAS, HIS: Hispanic, European: EUR). Each panel represents which of the five ancestry-group specific GWAS was used to ascertain SNPs. SNPs were ascertained using GCTA-COJO with a linkage disequilibrium reference set from the corresponding ancestry group. Within each panel, correlations were calculated using the subset of COJO SNPs, which marginal significance also met the significance threshold indicated on the x-axis. Each colour represents a pair of ancestry group.

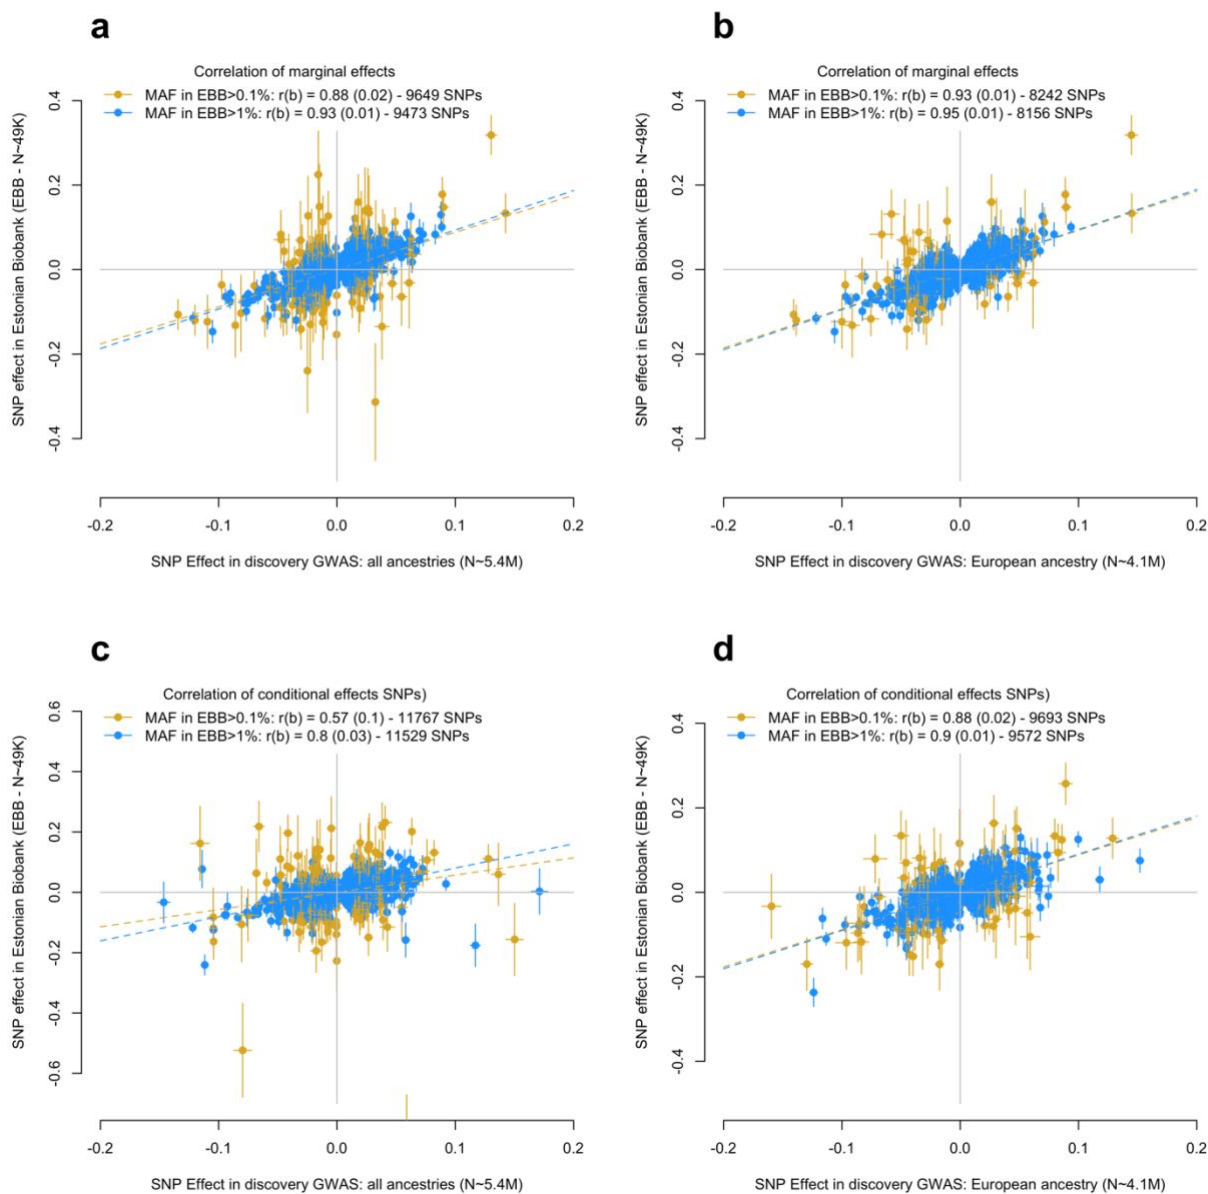

**Suppl. Fig. 14. Correlation of marginal and conditional SNPs effects between discovery and replication (Estonian Biobank – EBB) GWAS.** Panels **a** and **b** show correlations of marginal SNP effects for a subset of jointly associated SNPs (identified using the GCTA-COJO methods; **Methods**), which marginal effects also reach genome-wide significance. Panels **c** and **d** represent joint effect re-estimated using approximate conditional analyses (implemented in the GCTA software). Genotypes of ~350,000 unrelated participants of the UK Biobank were used as linkage disequilibrium (LD) reference.

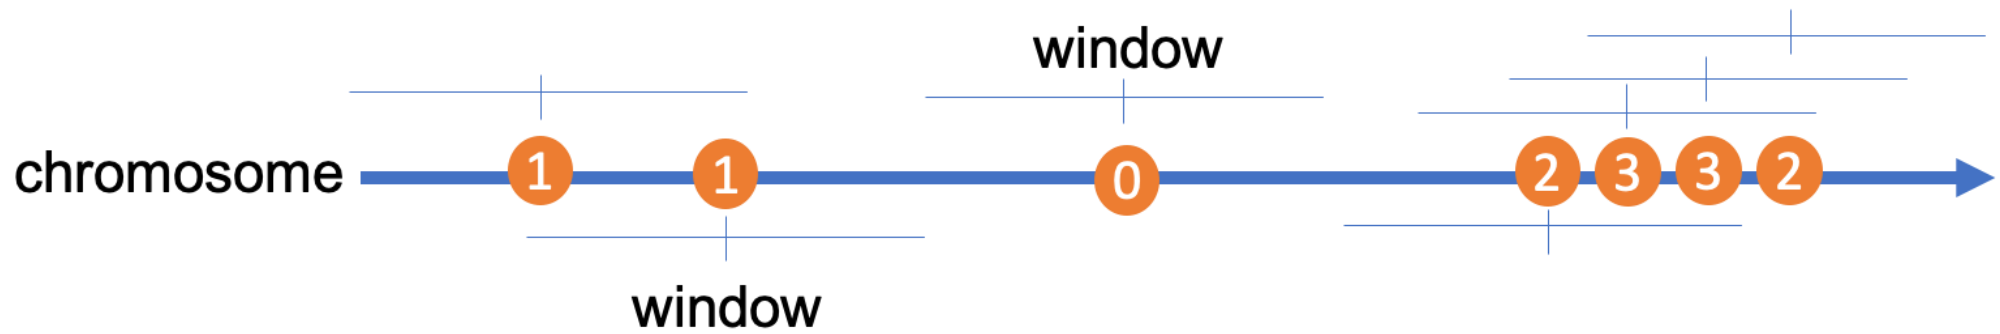

**Suppl. Fig. 15. Schematic representation of the measure of signal density.** The horizontal arrow represents a chromosome and each circle a specific association. For each association, the density is defined as the number of other independent associations within a certain window. In the example above, the window around the first SNP contains 1 SNP, so its density is 1. Similarly, the density at the third SNP (from the left) is 0 because the window around it does not contain any other association.

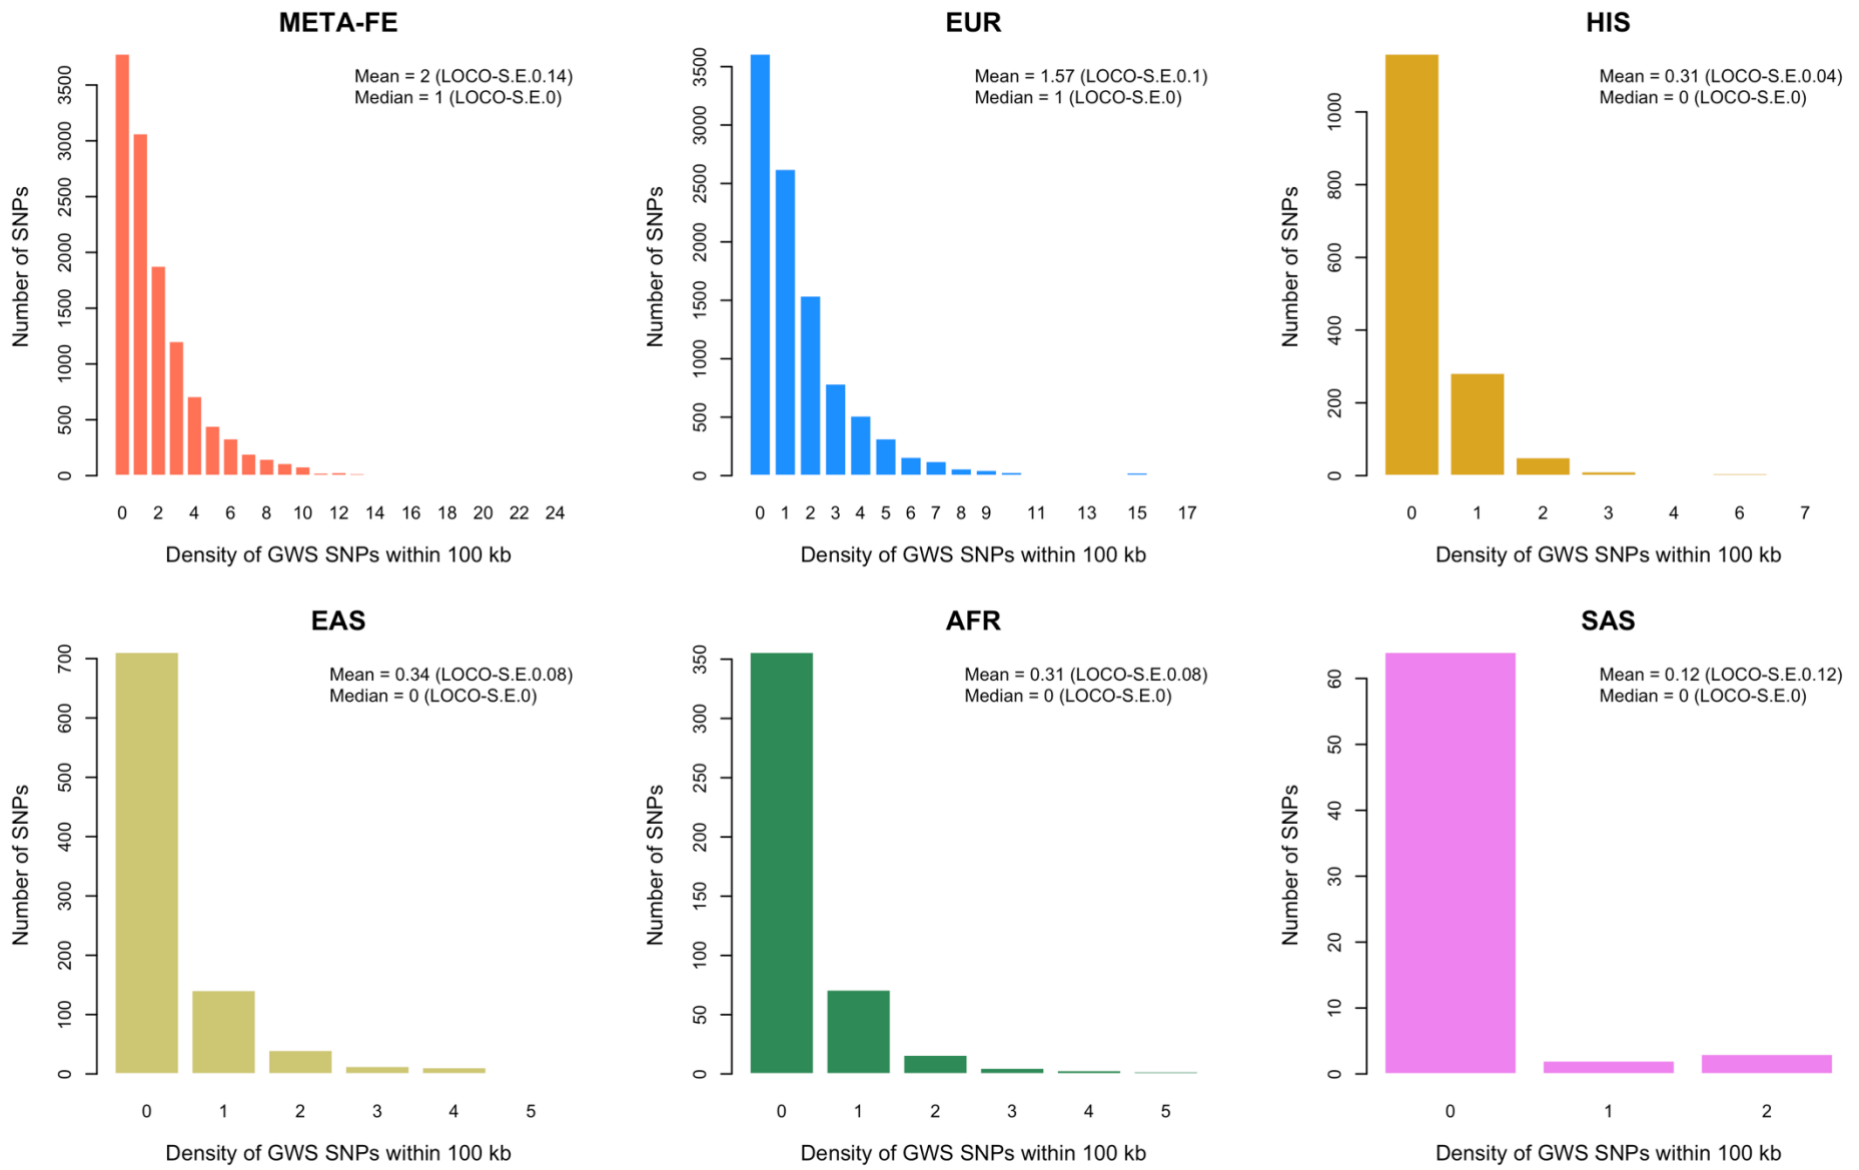

**Suppl. Fig. 16. Distribution of signal density.** Signal density (x-axes) is defined for each height-associated SNP as the number of other associations detected within 100 kb based on the  $META_{FE}$  and ancestries group specific meta-analyses. Y-axes represent the number of height-associated SNPs with a signal density indicated on the x-axis.

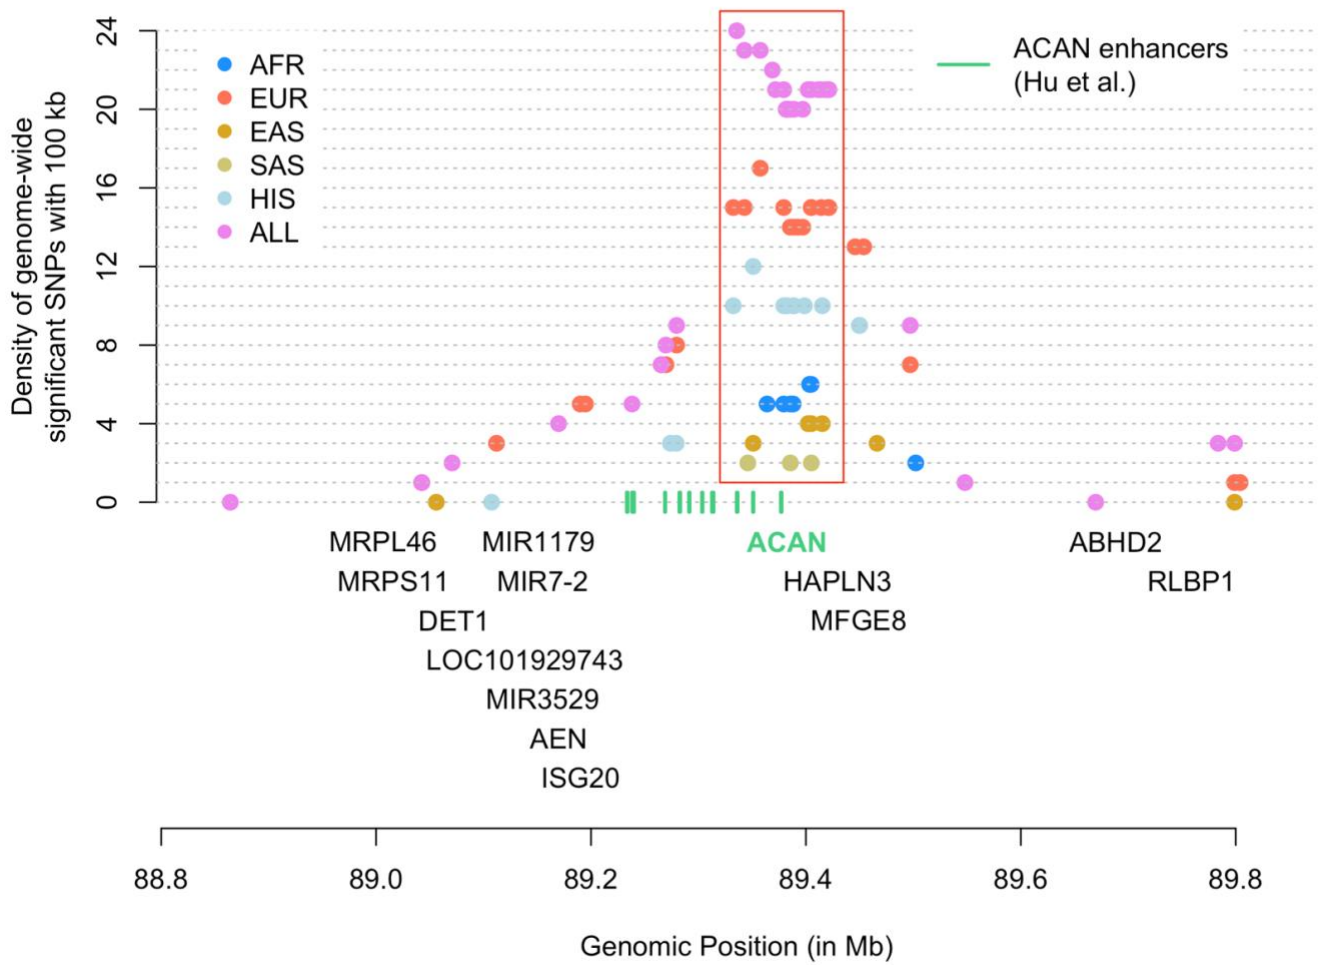

**Suppl. Fig. 17. Independent signal density at the *ACAN* gene locus across ancestries.** Independent associations were identified from GWAS performed in 5 ancestries (African: AFR; European: EUR; East-Asian: EAS; South-Asian: SAS and Hispanic: HIS) as well as from the meta-analysis of all ancestries (ALL). Genomic segments with a signal density >1 are found in each ancestry group.

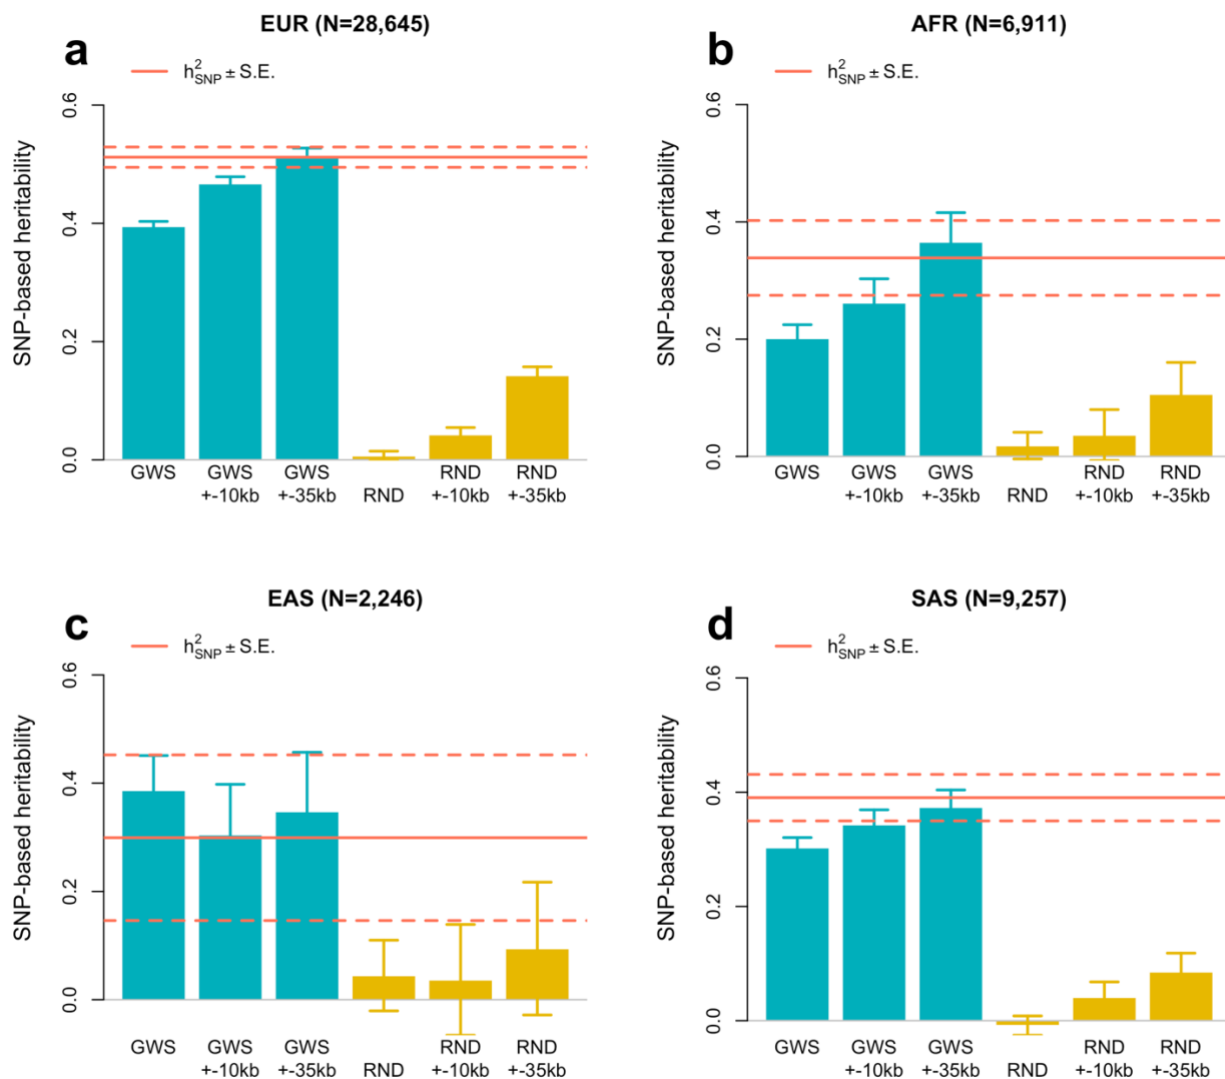

**Suppl. Fig. 18. Variance of height explained by SNPs in genome-wide significant (GWS) loci defined with various window sizes.** Stratified SNP-based heritability ( $h^2_{\text{SNP}}$ ) estimates were obtained for three partitions of the genome: (1) GWS SNPs alone vs. all other HapMap 3 (HM3) SNPs; (2) GWS SNPs +/- all HM3 SNPs within 10 kb vs. all other HM3 SNPs and (3) GWS SNPs +/- all HM3 SNPs within 35 kb vs. all other HM3 SNPs. Analyses were performed in samples of four different ancestries: European (EUR: meta-analysis of UK Biobank (UKB); N=14,587 + Lifelines data; N=14,058), African (AFR: UKB), East-Asian (EAS: UKB) and South-Asian (SAS: UKB). Estimates from stratified analyses were compared with SNP-based heritability estimates obtained from analysing all SNPs jointly (horizontal red bar; dotted lines represented standard errors). Analyses were repeated using a random set of 12,111 SNPs (and redefining loci relative to those), which minor allele frequency and linkage disequilibrium distribution matched that of GWS SNPs (RND: gold bars).

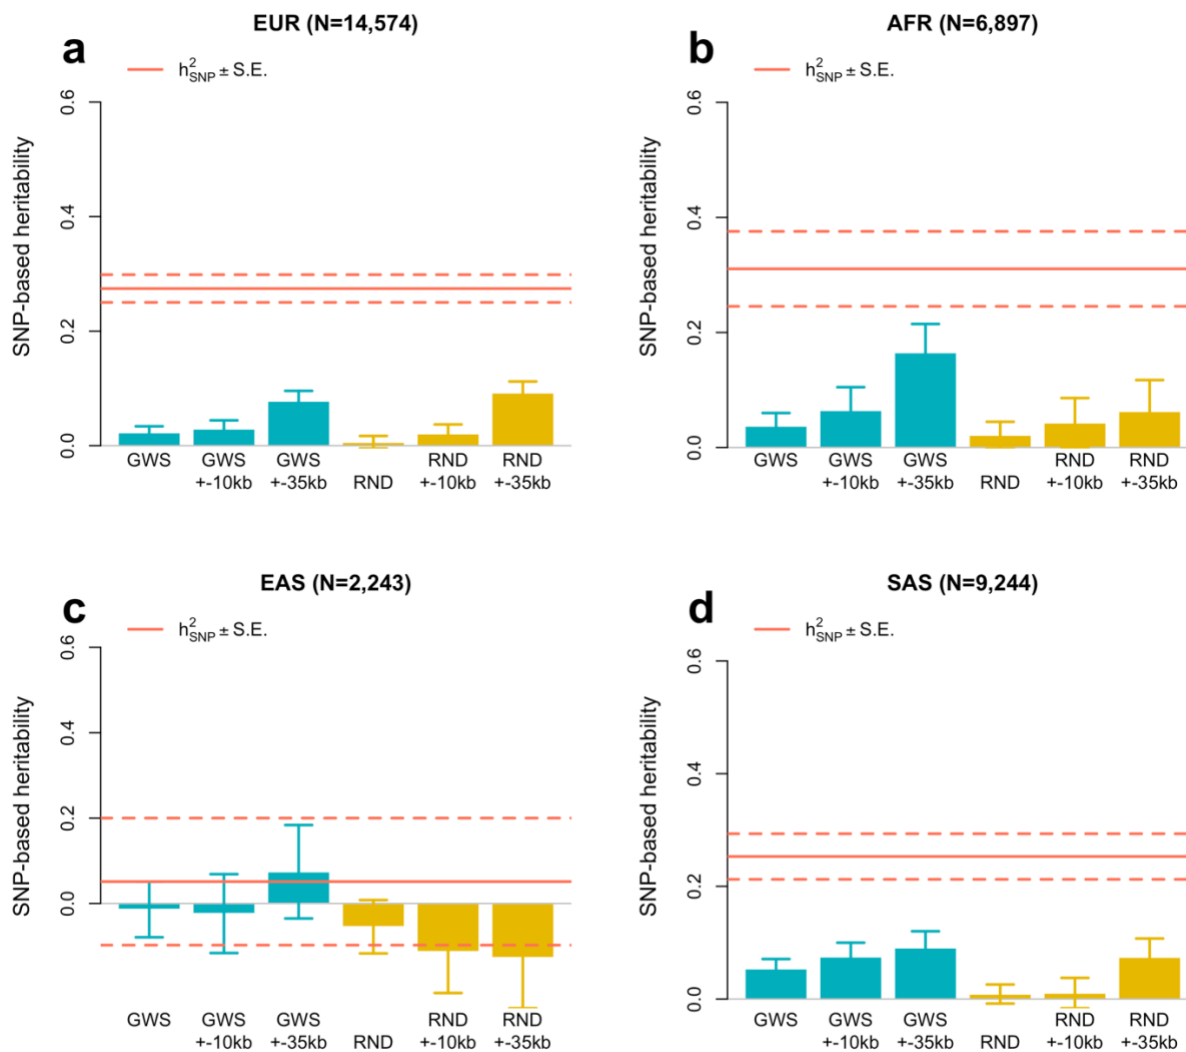

**Suppl. Fig. 19. Variance of body mass index (BMI) explained by height-associated genome-wide significant (GWS) loci defined with various window sizes.** Stratified SNP-based heritability ( $h_{\text{SNP}}^2$ ) estimates were obtained for three partitions of the genome: (1) GWS SNPs alone vs. all other HapMap 3 (HM3) SNPs; (2) GWS SNPs +/- all HM3 SNPs within 10 kb vs. all other HM3 SNPs and (3) GWS SNPs +/- all HM3 SNPs within 35 kb vs. all other HM3 SNPs. Analyses were performed in UK Biobank samples of four different ancestries: European (EUR), African (AFR), East-Asian (EAS) and South-Asian (SAS). Estimates from stratified analyses were compared with SNP-based heritability estimates obtained from analysing all SNPs jointly (horizontal red bar; dotted lines represented standard errors). Analyses were repeated using a random set of 12,111 SNPs (and redefining loci relative to those), which minor allele frequency and linkage disequilibrium distribution matched that of GWS SNPs (RND: gold bars).



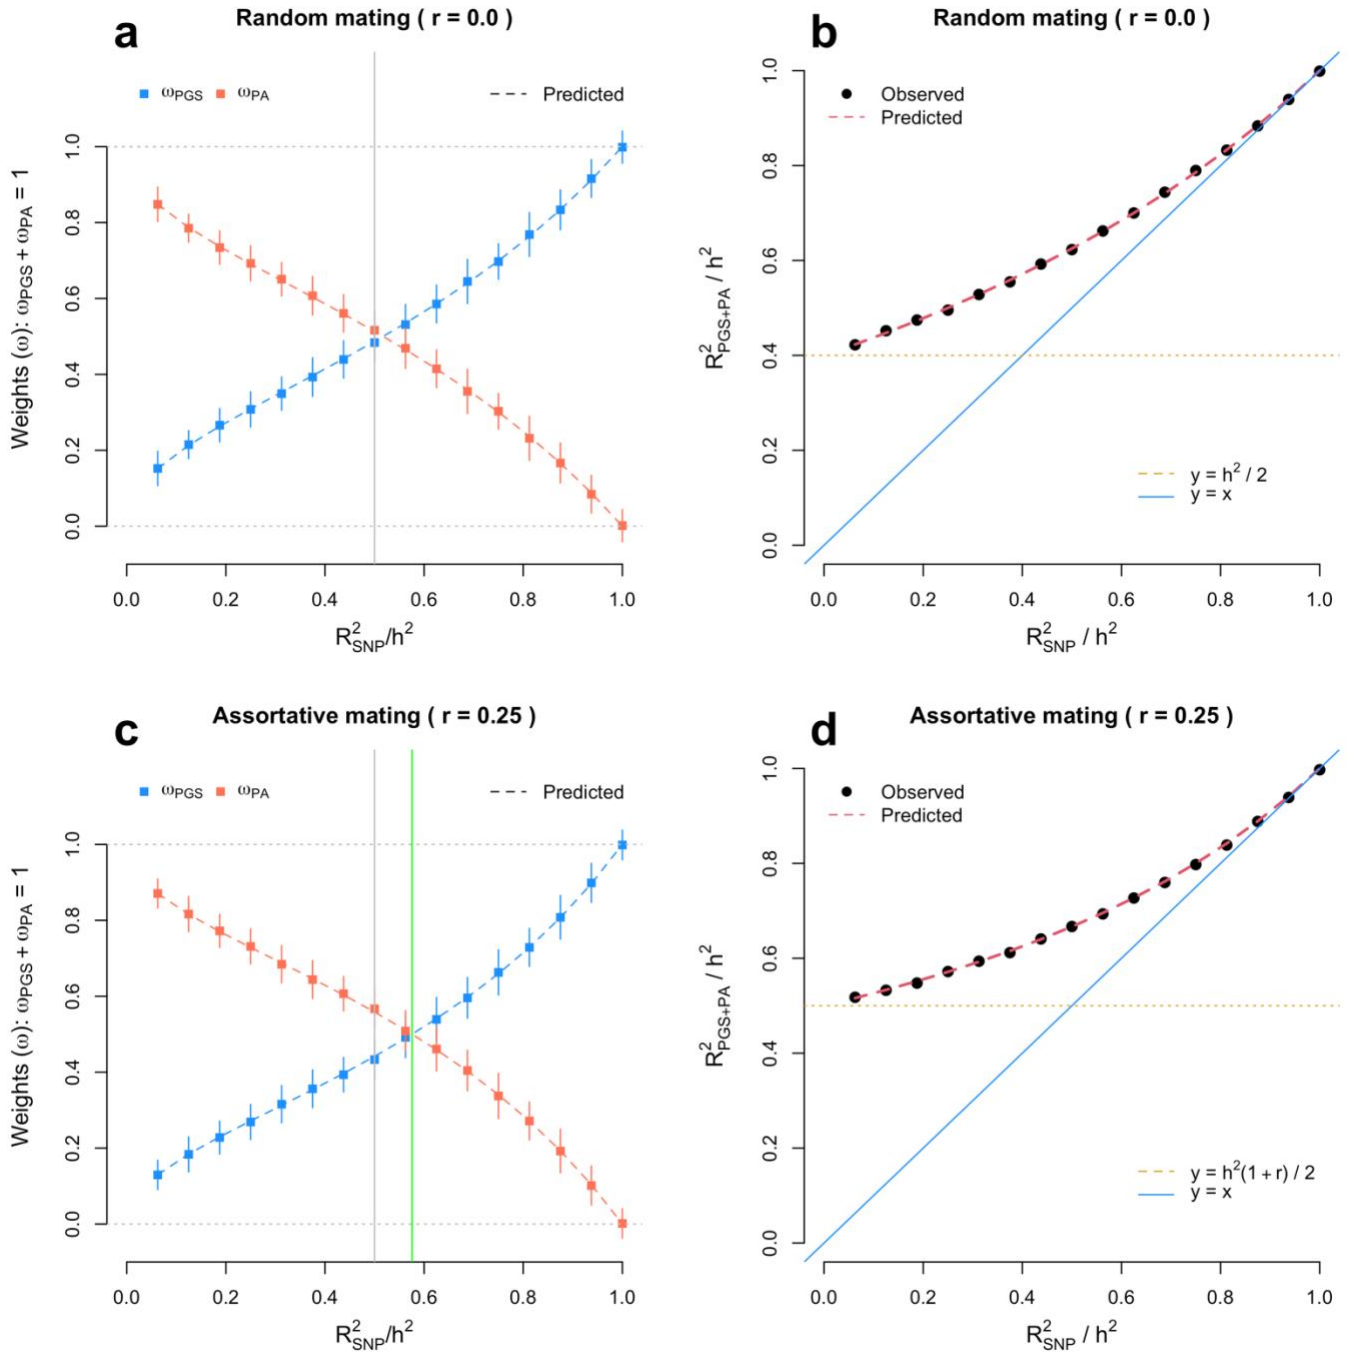

**Suppl. Fig. 20. Optimal weighting of PGS and parental information in simulated data.** We simulated a population of  $N=2,000$  individuals and a trait controlled by  $M=1,000$  causal variants. For simplicity, we assumed that a variable proportion of causal SNPs is used to calculate the PGS, and that SNP effects are estimated with negligible errors. We show below in Equation (3.11) how this proportion is chosen to achieve the desired prediction accuracy. We considered two scenarios: (i) random mating, i.e.  $r=0$  (**Panels a** and **b**) and assortative mating (for 20 generations) based on a spousal phenotypic correlation  $r=0.25$  (**Panels c** and **d**). In all simulations, we assumed a heritability  $h^2 = 0.8$  and varied the expected prediction accuracy ( $R_{\text{SNP}}^2$ ) between 0.05 and 0.8. The notation  $R_{\text{SNP}}^2$  is general and applies to any PGS based on independent SNPs, not just genome-wide significant as described in the main text. For each simulated population, we compared our predictions from Equation (S3.1) and (S3.2) with estimated regression coefficients obtained from regressing  $y$  on  $\hat{y}$  and  $\bar{y}_p$ . The vertical green bar in panel **c**, denotes the threshold above which PGS information outweighs parental information. The vertical grey bar in panels **a** and **c** denotes the threshold when  $R_{\text{SNP}}^2 = h^2/2$ . This threshold is predicted using Equation (S3.4). We also compared our variance explained by fitting both predictors with our predicted expectation from Equation (S3.3). Each dot is generated using 100 replicates. Overall, we found a perfect consistency between our theoretical and simulation results, which provides an empirical validation of these predictions.

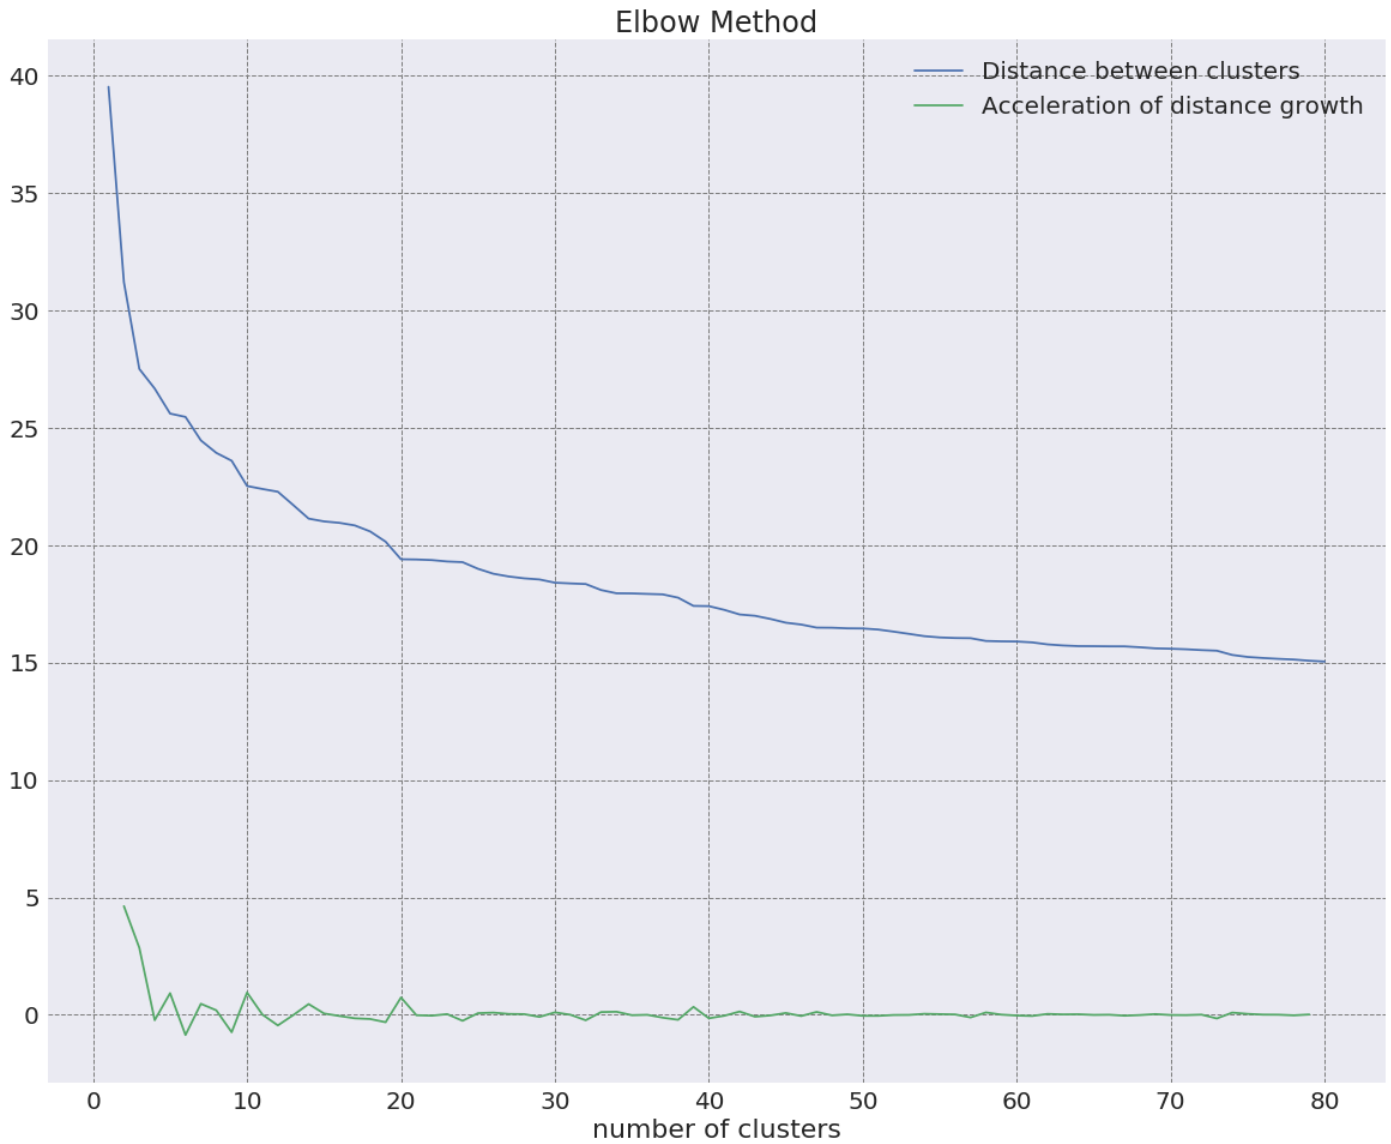

**Suppl. Fig. 21. Selection of the number of gene set clusters using the “Elbow method”.** Gene sets were hierarchically clustered at different sizes and the distance between each cluster evaluated. 20 clusters was chosen as an appropriate number of gene set clusters to evaluate for enrichment.

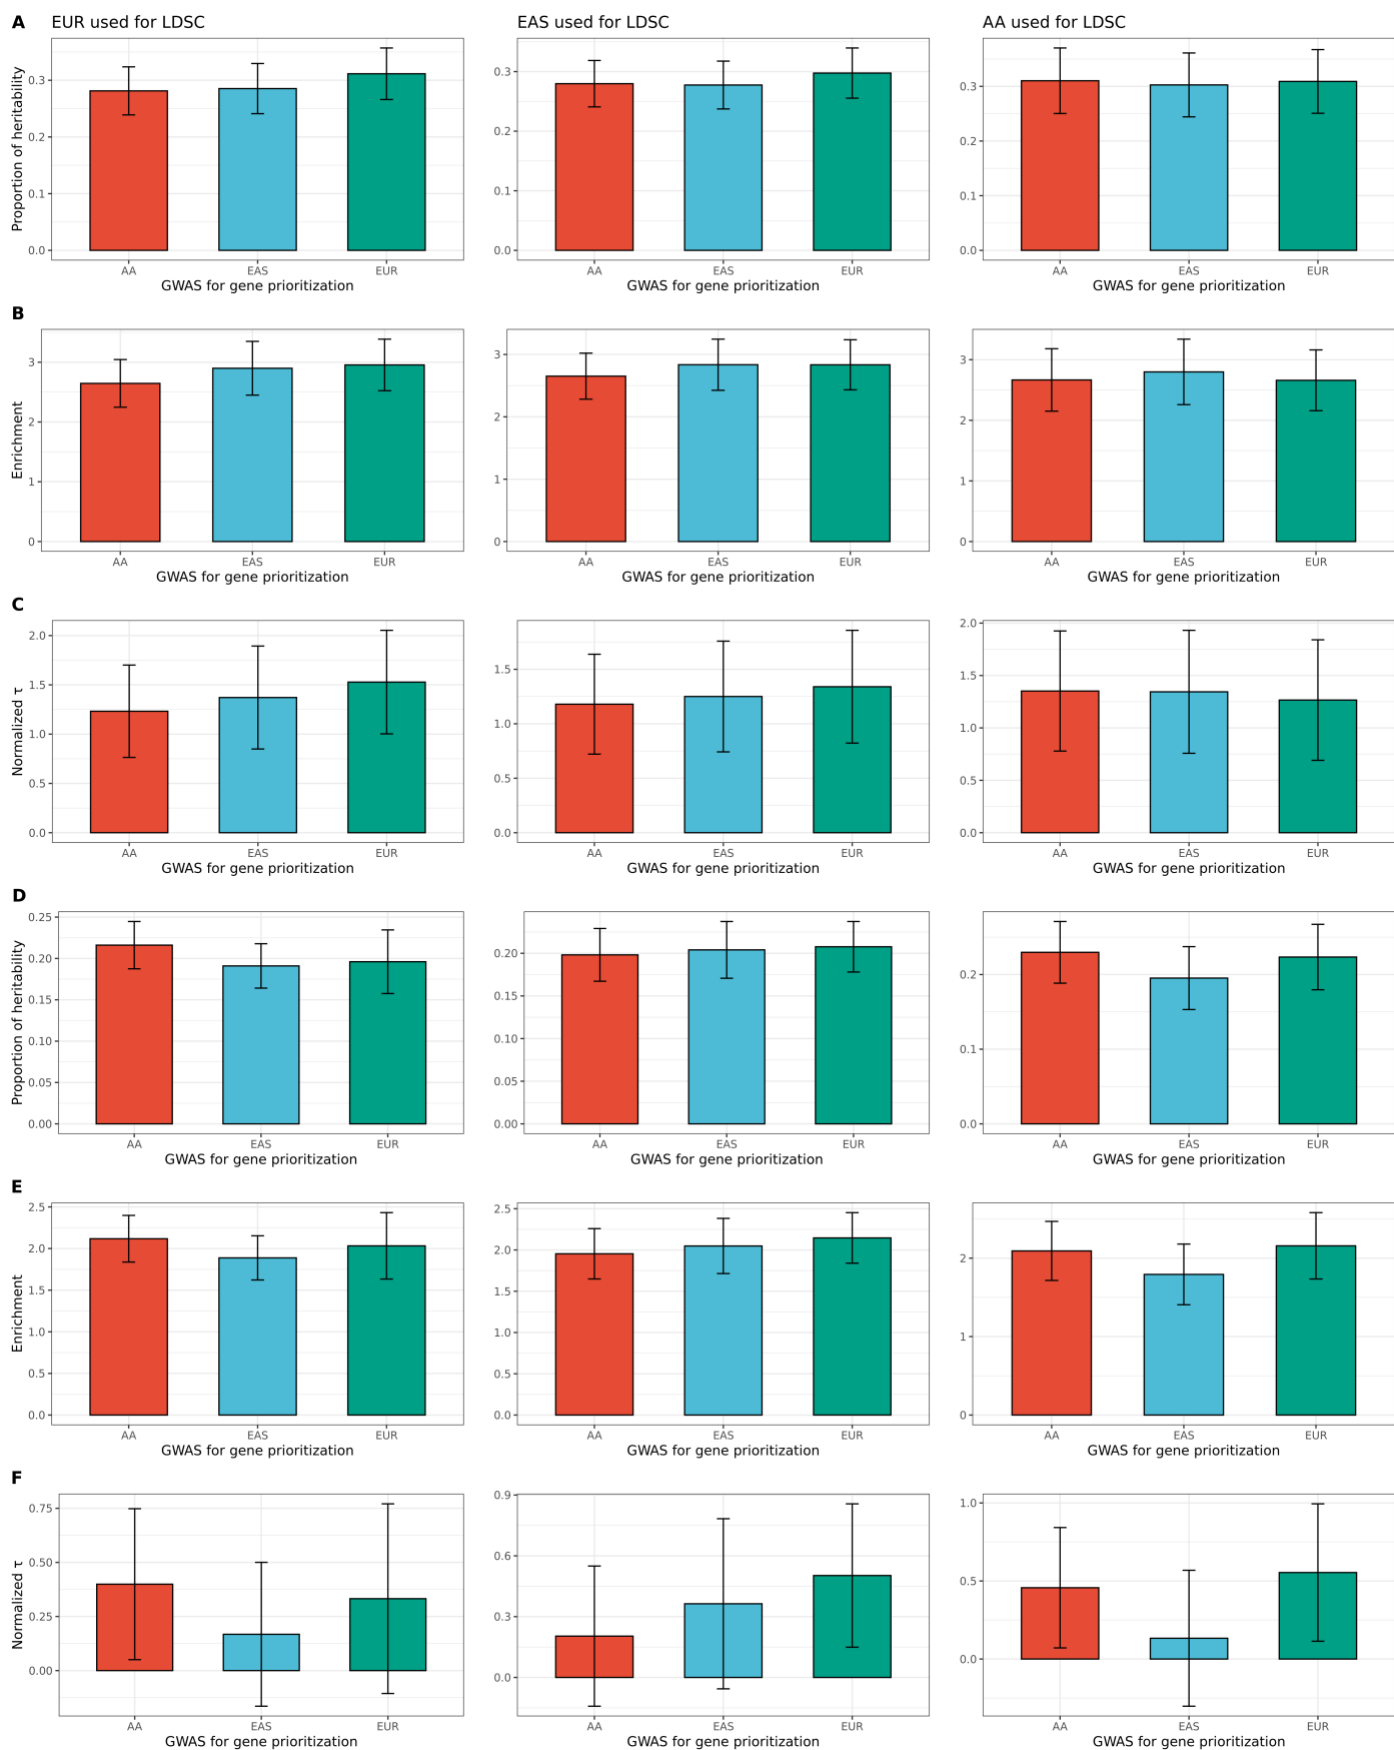

**Suppl. Fig. 22. Proportional heritability ( $h^2$ ) explained, enrichment, and normalized  $\tau$  estimates for MAGMA (panels A-C) and DEPICT (panels D-F).** The error bars represent the 95% confidence interval, calculated as estimate  $\pm 1.96 \times$  standard error. The labels for each subpanel indicate the ancestry represented in the GWAS used for LDSC, and the x-axis labels indicate the ancestry represented in the “discovery” GWAS used to prioritize the genes. EUR: European ancestry; AA: African-Americans of admixed European and African ancestries; EAS: East Asian ancestry. Analyses underlying this figure are further described in **Suppl. Note 5**.

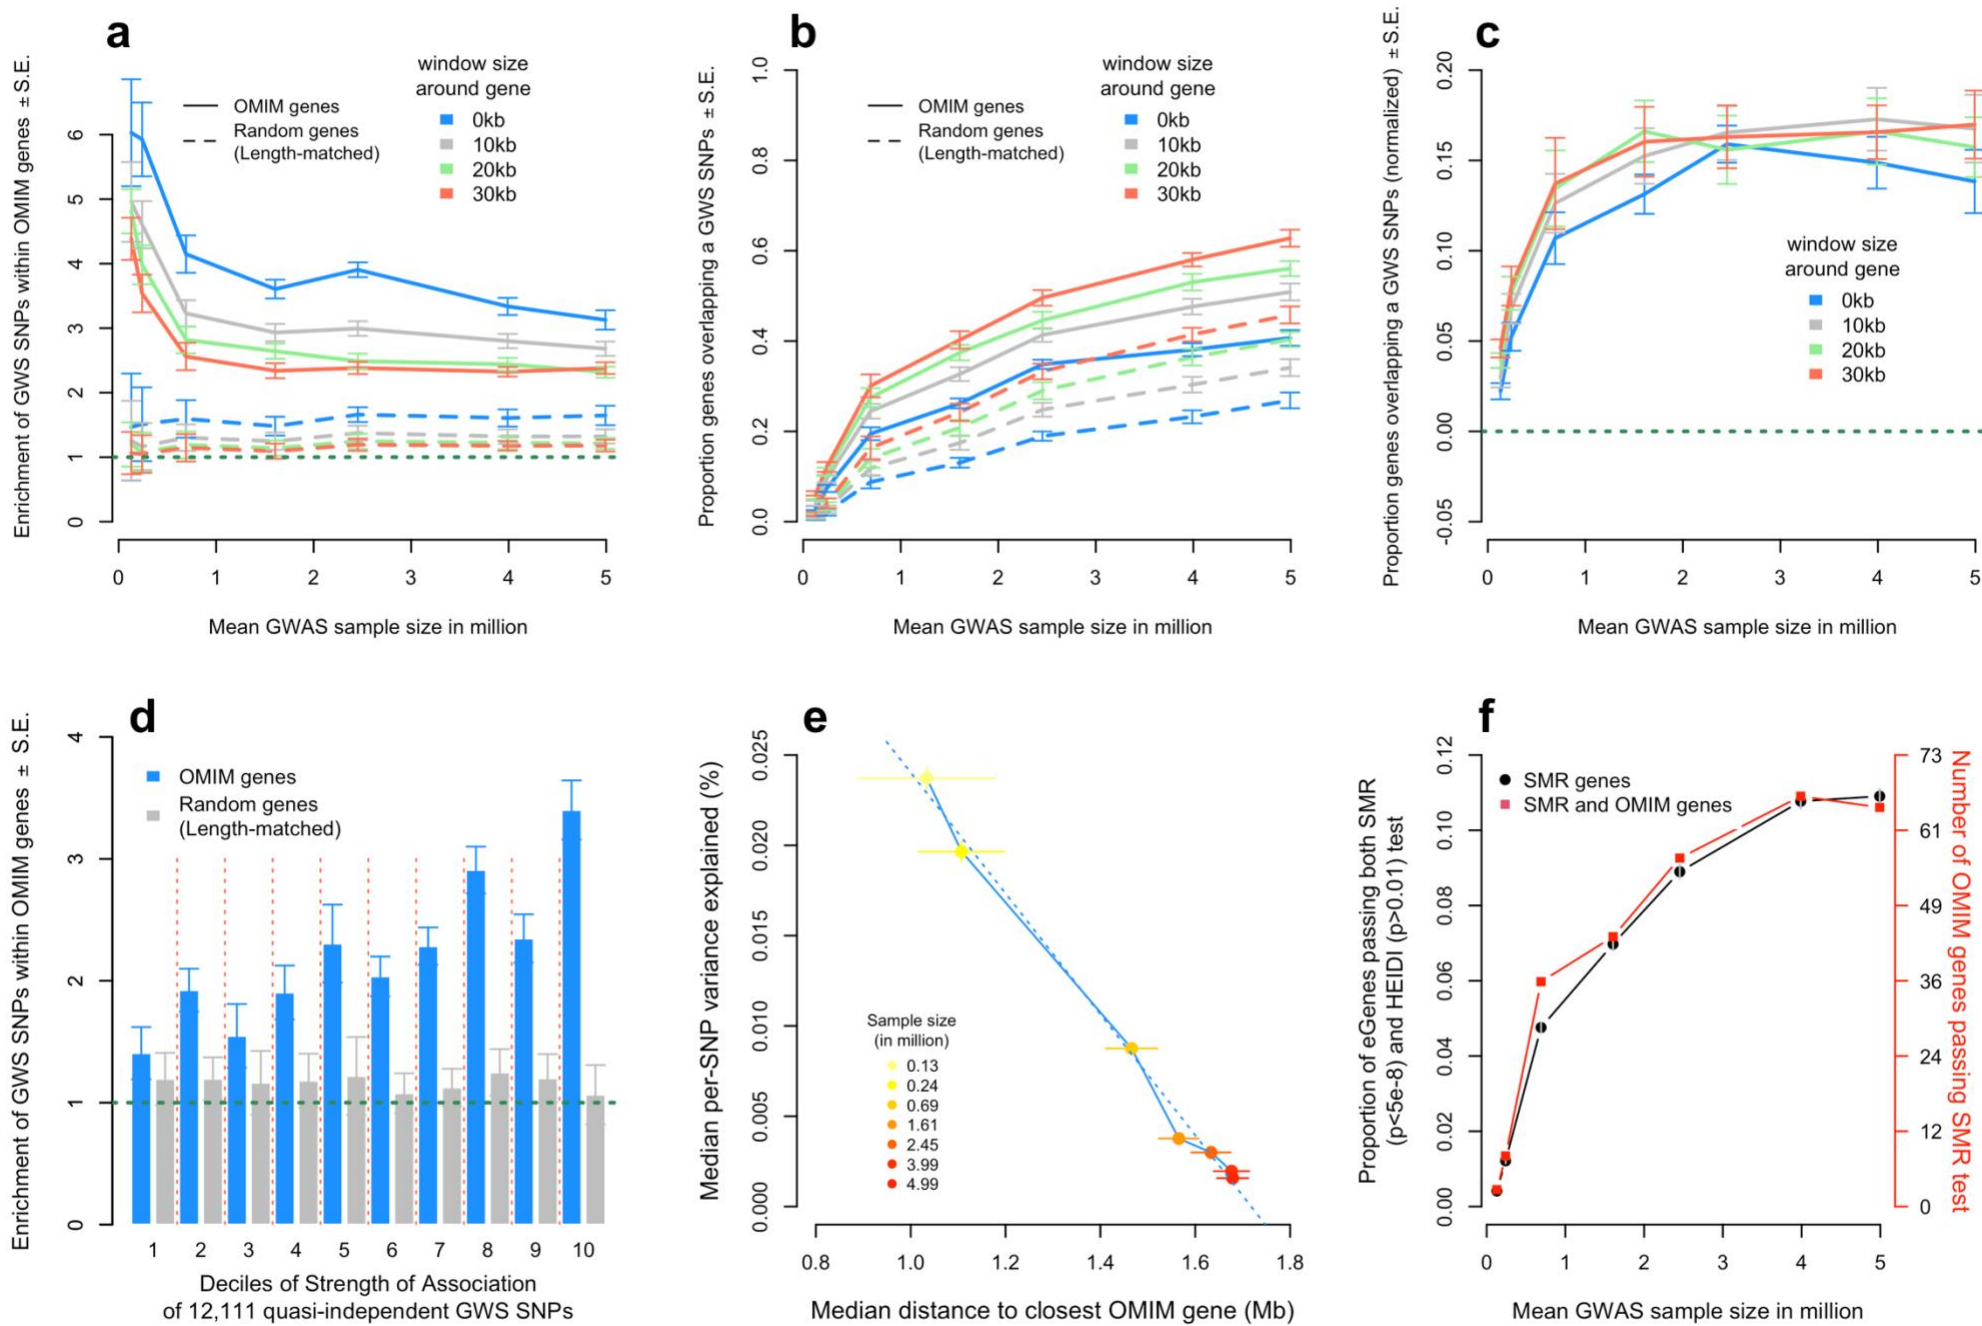

**Suppl. Fig. 23. Gene-level saturation of GWAS discoveries as a function of sample size.** Increase in sample size from ~4 million to ~5 million is achieved by including ~1 million participants of non-European ancestry. **Panel a** shows the enrichment of genome-wide significant (GWS) SNPs identified from an approximate conditional and joint (COJO) analysis within 462 genes associated with skeletal growth disorders from the Online Mendelian Inheritance in Man (OMIM) database (y-axis) as a function of GWAS sample size (x-axis). Standard Error (S.E.) were calculated as the standard deviation of enrichment statistics (odds ratio in the 2x2 contingency table contrasting for each gene: “is the gene an OMIM gene” vs. “does the gene contain a GWS SNP”) across 1,000 randomly sampled sets of 462 non-OMIM genes length-matched with OMIM genes. The average enrichment calculated across the 1,000 random gene sets is represented with dotted lines. Presence of a GWS SNP within a gene was assessed relative to gene start and stop position, considering flanking regions within 0 kb, 10 kb, 20 kb and 30 kb. **Panel b** shows the proportion of OMIM overlapping genes with at least one GWS SNPs (y-axis). As in **Panel a**, dotted lines represents the null distribution from 1,000 random sets of genes length-matched with OMIM genes. Standard errors (S.E.) were calculated as the standard deviation of the proportion observed across the 1,000 draws from the null distribution. **Panel c** represents the proportion of OMIM genes near GWS SNPs after subtracting the mean of the null distribution at each sample size. **Panel d** represents the enrichment of OMIM genes as a function of the strength of association of 12,111 independent GWS SNPs identified in our largest GWAS (N~5.4M). GWS SNPs were grouped into 10 decile groups of ~1,211 SNPs. Enrichment near OMIM genes is stronger of SNPs explaining a larger proportion of height variance (top decile). **Panel e** shows the median per-SNP variance explained (y-axis) as a function of the median distance to the closest OMIM gene. Large GWAS tend to identify variants with smaller effect sizes and further away from OMIM genes. **Panels f** shows the number of genes prioritised using Summary-data based Mendelian Randomization (SMR;  $P < 5 \times 10^{-8}$ ), which expression may act a mediator of the effects of SNP on height. SMR analyses were based on expression quantitative trait loci (eQTL) identified in the GTEx and eQTLgen studies (**Methods**). The z-axis (in red) shows the number of OMIM genes overlapping with SMR genes identified from analysing GWAS with various sample sizes (x-axis).

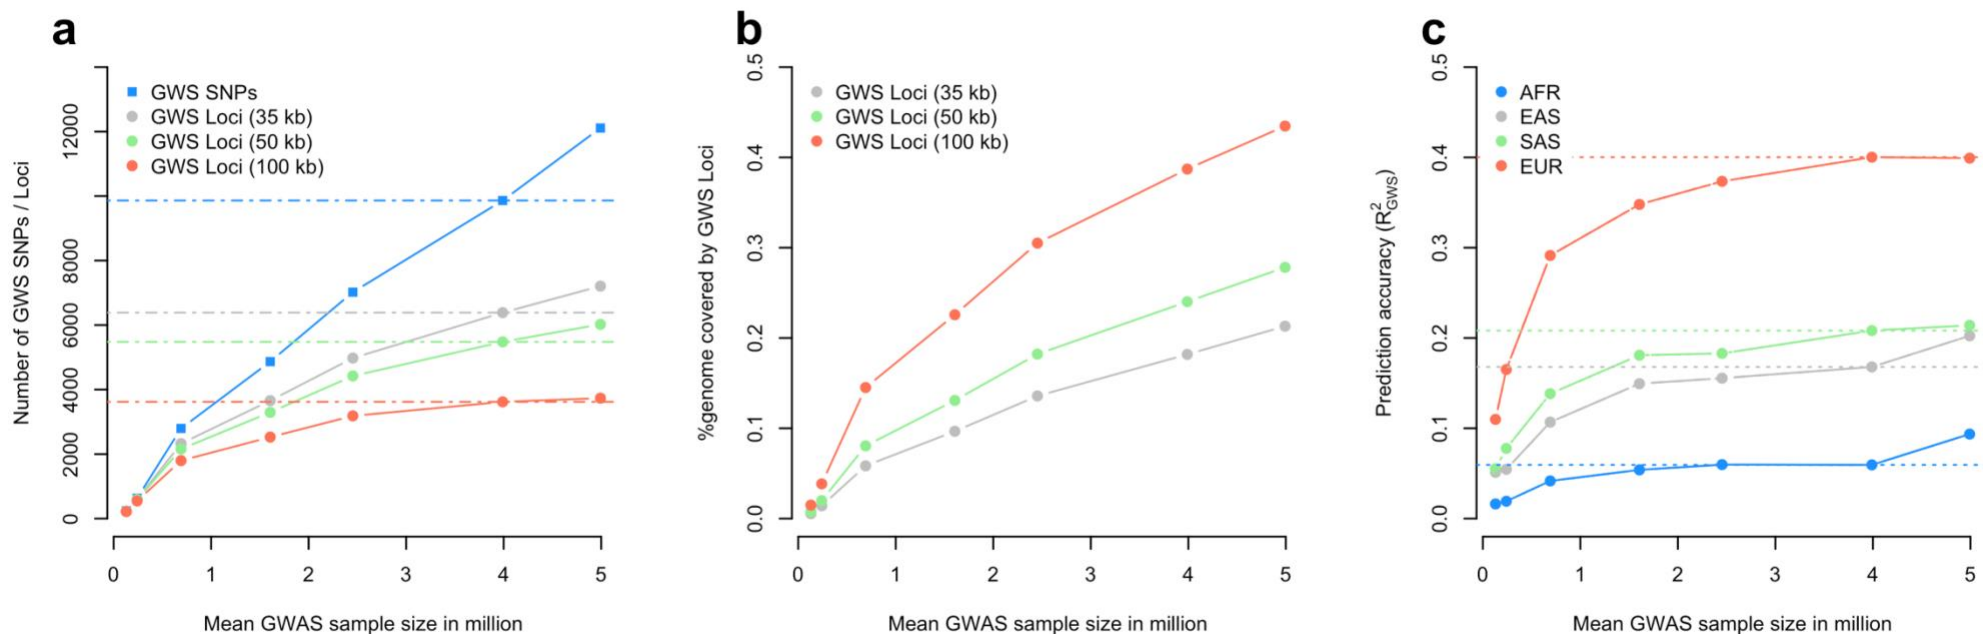

**Suppl. Fig. 24. Variant-level saturation of GWAS discoveries as a function of sample size.** Increase in sample size from ~4 million to ~5 million is achieved by including ~1 million participants of non-European ancestry. **Panel a** shows number of independent genome-wide significant (GWS) SNPs and loci identified at various GWAS sample sizes (Details about down-sampled GWAS are given in [Table 2](#)). GWS loci were defined using various window sizes including 35kb, 50kb and 100 kb. **Panel b** shows the percentage of the genome covered by GWS loci. Coverage was calculated as the cumulative length of GWS loci in Mb divided 3,039 Mb, the estimated length of the human genome. **Panel c** shows the prediction accuracy ( $R^2_{GWS}$ ) of various polygenic scores on GWS SNPs identified at various sample sizes. In **Panels a** and **c**, dotted lines represent y-axis values for our largest European ancestry GWAS (N~4 million).

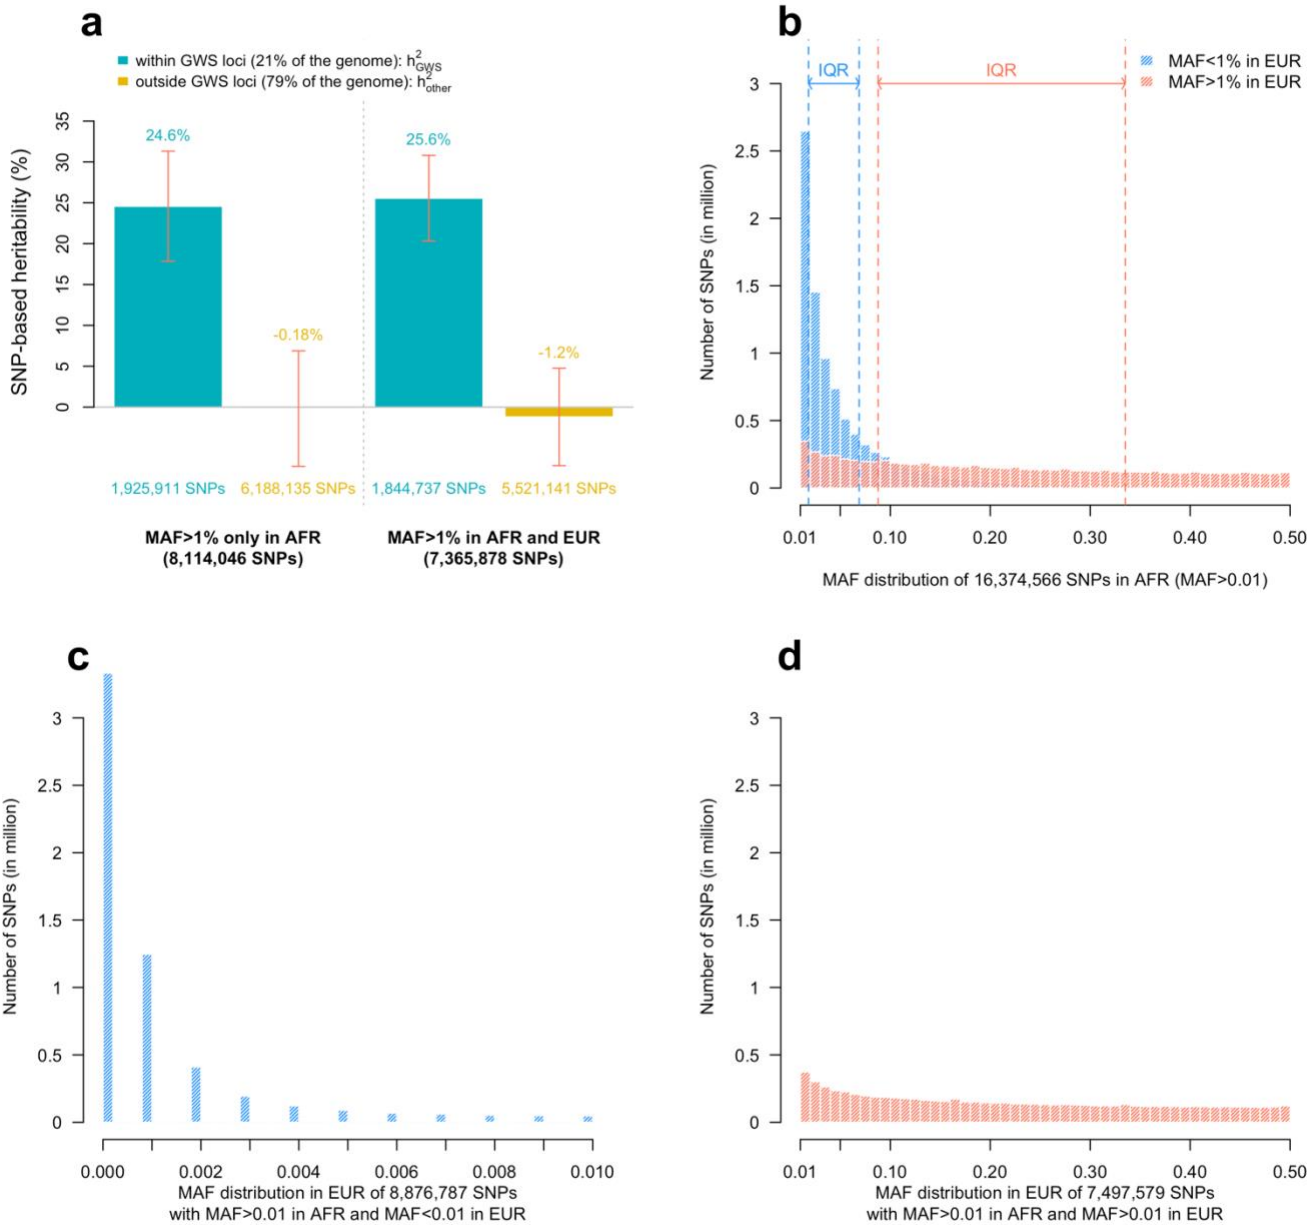

**Suppl. Fig. 25. Partitioned SNP-based heritability of height in African ancestry individuals.** Panels **a** represent partitioned SNP-based heritability estimates from a sample of 6,911 unrelated African ancestry (AFR) individuals from the UK Biobank, independent of our discovery GWAS. This analysis focuses on 16,374,566 SNPs with a minor allele frequency (MAF)>1% in AFR. These SNPs were further stratified according to their MAF in European ancestry (EUR) populations: 7,365,878 SNPs with MAF>1% in EUR (47%) vs. 8,114,046 SNPs with MAF<1% in EUR (53%) and their position within vs. outside genome-wide significant (GWS) loci. **Panel b** shows the MAF distribution of the 16M SNPs in AFR and panels (c – d) the distribution of these SNPs in EUR. The SNP-based heritability contributed by SNPs within GWS loci is denoted  $h_{GWS}^2$ , while that contributed by SNPs outside these loci is denoted  $h_{other}^2$ . These results are further discussed in **Suppl. Note 6**.

## SUPPLEMENTARY NOTES

### Supplementary Note 1: Sensitivity Analyses of COJO results

#### Long range LD in admixed populations can bias estimation of approximate conditional SNP effects

We compared the prediction accuracy of polygenic scores (PGS) based on genome-wide significant (GWS) SNPs identified in each ancestry groups. For each set of ancestry-specific GWS SNPs we calculated a PGS using either marginal SNP effects (hereafter denoted  $PGS_{GWS}$ ) or conditional effects (hereafter denoted  $PGS_{COJO}$ ) approximated using GCTA-COJO (Methods). Given that COJO is designed to detect secondary signals, i.e. explaining additional trait variance, we expect the prediction accuracy of  $PGS_{COJO}$  to be similar, if not outperform, that of  $PGS_{GWS}$ .

Consistently, we found that  $PGS_{COJO}$  yields a higher accuracy than  $PGS_{GWS}$  in most cases except in HIS and AFR (Suppl. Fig. 3a). We further investigated that observation and found that the poor performances of  $PGS_{COJO}$  relative to  $PGS_{GWS}$  in HIS and AFR were driven by specific chromosomes such chromosome 6, 9 and 20 (Suppl. Fig. 3b), where estimated conditional effects were abnormally large (Suppl. Fig. 3c).

We hypothesized that these unexpected observations could be explained by estimation errors during the stepwise model selection procedure, e.g., because of collinearity between SNPs included in the model. Note that GCTA sets a default threshold of 0.9 for collinearity between SNPs, which means that the variance of genotypes at a given SNP included in the model cannot be explained at >90% by all other SNPs included in the model. To explore the impact of this parameter on our observations we performed a sensitivity analysis by varying the collinearity threshold between 0.1 and 0.9.

We found that using a more stringent collinearity threshold reduces the prediction accuracy of  $PGS_{COJO}$  in EUR and EAS (accuracy in SAS remained unchanged) but produces an opposite effect in AFR and HIS (Suppl. Fig. 4). More specifically, setting the collinearity threshold below 0.5 restored the prediction accuracy of  $PGS_{COJO}$  up to a level comparable to that of  $PGS_{GWS}$ . Therefore, our sensitivity analyses suggest that stringent collinearity thresholds are preferable when applying COJO to GWAS from admixed ancestry groups such as HIS and AFR.

Consequently, the COJO results presented in the main text are based upon a collinearity threshold of 0.1 for HIS and AFR and the default threshold of 0.9 for all other COJO analyses. We chose 0.1 because it produces the most parsimonious model (i.e. fewer number of associations) without impacting prediction accuracy.

#### Impact of ancestry composition of LD reference panel on COJO results

We re-analysed summary statistics from our cross-ancestry GWAS meta-analysis using two LD reference sets. First, we randomly selected 37,900 EUR, 4,400 EAS, 4,250 HIS, 2,750 AFR and 700 SAS individuals (i.e. 50000 individuals in total) to form a LD reference set with ancestries proportions matching that in our cross-ancestry meta-analysis. The second set contained 50,000 individuals with EUR ancestries. We restricted analyses with both LD reference sets to 882,755 HM3 SNPs, which passed quality control (Hardy-Weinberg Equilibrium test, missingness and imputation quality) in all five ancestry groups.

We found that COJO based on the multi-ancestry LD panel only detected 3,635 (3380 using a collinearity-threshold of 0.1) independent associations vs. 11,001 associations using the EUR LD reference. The latter number is smaller than the 12,111 reported in the main text but consistent with a ~10-15% smaller number of HM3 SNPs used as input. We also repeated analyses using the 37,900 EUR individuals as LD reference and found that COJO detects 11,065 SNPs, indicating that using this multi-ancestry LD panel leads to underestimation by COJO of the number of associations. This



conclusion is supported by the fact that a PGS based on 11,001 COJO SNPs detected using a EUR LD panel explains a significantly larger amount of height variance than that of a PGS based on only 3,380 COJO SNPs detected with a multi-ancestry panel (EUR: 38.2% vs 26.4%; SAS: 20.3% vs 13.4%; EAS: 19.5% vs 13.3% and AFR: 9.0% vs 5.0%). Moreover, we ran another COJO analysis of our cross-ancestry GWAS using LD information from 10,636 AFR individuals (i.e. same LD panel for our AFR GWAS meta-analysis). Note that 242,891 / 882,755 (i.e. 27.5%) SNPs were filtered out by GCTA prior to analysis because of expected large differences in allele frequencies between our cross-ancestry GWAS including >75% of EUR individuals and the AFR LD panel (by default GCTA exclude SNPs with an absolute frequency difference is >0.1). Nevertheless, we detected 5,701 quasi-independent joint associations (i.e. more associations than using a mix-ancestry panel), explaining 24.6%, 13.2%, 10.9% and 3.5% of height variance in EUR, SAS, EAS and AFR individuals respectively. The latter predictive performances are lower to that obtained with a PGS from 3,380 COJO SNPs.

Altogether, these results demonstrate that COJO with a composite LD reference panel does not improve and likely hinders the detection of associations in our cross-ancestry GWAS meta-analysis. We emphasize that extending the COJO methodology for analysing multi-ancestry GWAS is an independent research question, which goes beyond the scope of our study.

## Supplementary Note 2: Investigation of population stratification in large GWAS of height

### Assessment of population stratification in European ancestries GWAS

Recent studies<sup>9,10</sup> have shown evidence of significant confounding in estimated SNP effects induced by uncorrected population stratification (PS) in summary statistics from the Wood et al. (2014)<sup>20</sup> study. Importantly, Wood et al. (2014) also reported residual PS mostly affecting estimated effects of SNPs weakly associated with height (Figure 2a-c in ref.<sup>20</sup>). To ensure increased robustness and reliability of our findings, we perform here a series of analyses to quantify confounding effects of residual PS in all GWAS results reported in this study.

### LD score regression analysis of European ancestries GWAS

First, we performed a LD score regression (LDSC) analysis<sup>16</sup> of our GWAS meta-analysis of EUR participants (N=4,080,687). We assessed the degree of PS using the attenuation ratio statistic ( $R_{LDSC}$ ), which provides a quantification of PS that is independent of sample size. The estimated  $R_{LDSC}$  is ~3.8% (S.E. 0.8%), suggesting that most of the inflation of association test statistic is explained by polygenicity and not PS. In comparison, GWAS of height without any adjustment for population stratification produce values of  $R_{LDSC}$  ~10-13%.<sup>67</sup> Our estimated  $R_{LDSC}$  is slightly smaller than that from LDSC analyses of previously published GWAS of height (Wood et al. (2014): 4.3% (S.E. 1.3%); Yengo et al. (2018)<sup>3</sup> 4.0% (S.E. 1.2%)), which suggests a reduced effect of residual PS on our results. Note that the estimated  $R_{LDSC}$  shown here are obtained from analysing imputed GWAS summary statistics from Wood et al. (2014) and Yengo et al. (2018) (**Supplementary Methods**), which have a better coverage of HM3 SNPs; and thus explaining the difference with the ~6.0% (S.E. 1.0%) reported in Yengo et al. (2018). However, as a measure of PS,  $R_{LDSC}$  is not strictly comparable across studies. In fact, the expectation of  $R_{LDSC}$  (across repeated GWAS) not only depends on how much trait variance is explained by PS, but also on the degree of genetic differentiation between cohorts ( $F_{ST}$ ) and the trait heritability within each cohort.<sup>16</sup> The last two factors can vary from one GWAS meta-analysis to another as a function of cohort composition. In summary, these LDSC analyses suggest that uncorrected PS only marginally affects SNP effects from our large GWAS of height in EUR participants.

### Assessment of allele frequencies for height increasing alleles across the North-South axis of Europe reveals attenuated correlation relative to previous studies

As an alternative to  $R_{LDSC}$ , we next quantified PS in our GWAS using the correlation between strength of association (p-value) and height-increasing allele frequency differences between Great Britain (GBR sample in the 1000 Genomes Project – 1KGP) and the Italian Tuscan population (TSI sample in 1KGP). This statistic was previously introduced by Sohail and colleagues<sup>10</sup> to reveal biases in SNP effect estimates from the Wood et al. study, that were induced by uncorrected PS along the North-South gradient of Europe. More precisely, the strategy implemented by Sohail et al. consists in grouping SNPs based on strength of association, then regress the mean height-increasing allele frequency differences between GBR and TSI for each SNP bin onto the mean p-value of the corresponding bin. The slope of that linear regression ( $\beta_{PS}$ ) measures the degree of PS. We estimated  $\beta_{PS}$  using 101,360 near independent HM3 SNPs with MAF>1% and calculated standard errors using a bootstrap strategy based on 1,000 independent draws.

As previously reported, we found a significant  $\beta_{PS}$  of ~1.28% (S.E. 0.08%;  $P = 2.3 \times 10^{-61}$ ) using summary statistics of the Wood et al. (2014) study but no significant  $\beta_{PS}$  from within-family GWAS in 17,942 independent UKB siblings pairs ( $\beta_{PS}=-0.08\%$ , S.E. = 0.07%;  $P=0.27$ ). We show in **Suppl. Fig. 5a-b** estimates of  $\beta_{PS}$  from GWAS summary statistics of Yengo et al. (2018), EUR participants of 23andMe (23andME-EUR), all EUR participants of the UKB (UKB-456k; GWAS using BOLT-LMM), unrelated EUR participants of the UKB (UKB-350k; GWAS using PLINK), the meta-analysis EUR participants from multiple cohorts of the GIANT consortium (GIANT-EUR; N~1.6M); and the meta-analysis of GIANT-EUR and 23andMe-EUR. Overall, we find that  $\beta_{PS}$  decreases with sample size, consistent with an increased signal-to-noise ratio. In particular,  $\beta_{PS}$  is ~0.13% ( $P=0.1$ ) in our largest GWAS meta-analysis of N~4.1M

EUR participants, which demonstrates a better correction of PS than previously published EUR GWAS of height.

Furthermore, we assessed the squared correlation between estimated effects at these 101,360 independent HM3 SNPs and SNP loadings from 20 principal components (PCs) calculated in 503 EUR samples from 1KGP. Across SNPs, we found that SNP loadings on PC2 explain most of the variance in estimated SNP effects (**Suppl. Fig. 5c**). This observation is not surprising given that PC2 is the PC that correlates the most with the North-South axis of Europe, and therefore explains the consistency with our results based on  $\beta_{PS}$ . However, <0.3% of the variance of SNP effects estimated in our largest GWAS is explained by SNP loadings, which is much lower than  $\sim 2.3\%$  obtained when analysing SNP effects from Wood et al. (2014).

### **Comparison of estimated SNP effects between GWAS meta-analyses and family-based GWAS**

Finally, we directly compared SNP effects from our GWAS ( $\beta_{GWAS}$ ) with that of a within-family GWAS in 17,942 independent UKB siblings pairs ( $\beta_{SIB}$ ). We used  $S_{PS} = \text{cov}(\beta_{GWAS}, \beta_{SIB}) / \text{var}(\beta_{GWAS})$  as our metric of interest in this comparison, where both  $\text{cov}(\beta_{GWAS}, \beta_{SIB})$  and  $\text{var}(\beta_{GWAS})$  are calculated across SNPs. When SNP effects are estimated using ordinary least-squares (OLS) regression, the expectation of  $S_{PS}$  in the absence of PS is  $E[S_{PS}] = 1$ . Therefore, a significant deviation of  $S_{PS}$  below 1, may indicate confounding due to residual PS. However, the statistical properties of  $S_{PS}$  based on SNP effects estimated using linear mixed models (LMM) (or meta-analyses of OLS and LMM estimates) are not well characterised, which may affect our interpretation below.

We found that estimates of  $S_{PS}$  based on SNPs strongly associated with height are much closer to 1 than when all SNPs are used, i.e. regardless of strength of association ( $P < 1$ ; **Suppl. Fig. 5d**). We observed the lowest value of  $S_{PS} \sim 0.29$  (S.E. 0.01) when using effects of all 101,360 SNPs estimated in the Wood et al. study. In comparison, estimated SNP effects from our largest EUR GWAS yields an  $S_{PS} > 0.8$  regardless of strength of association, yet still significantly lower than 1 ( $P < 7 \times 10^{-30}$ ).

Lee et al.<sup>68</sup> previously showed that assortative mating (AM) on height can produce values of  $S_{PS} < 1$ . Under the assumption that the population has reached an equilibrium after many generations of AM with a constant spousal correlation ( $r$ ), they showed that

$$(1.1) \quad E[S_{PS}] = 1 - rh^2,$$

where  $h^2$  is the full narrow-sense heritability in the current generation (at equilibrium). We note here an error in the Supplementary Notes of Lee et al. (2018), who used in their derivations the heritability in the base population undergoing random mating ( $h_0^2$ ) instead of the equilibrium heritability,  $h^2$ . In practice, differences between  $h_0^2 = (h^2 - rh^4)/(1 - rh^4)$  and  $h^2$  are small. Therefore, using one or the other heritability has a limited impact on the expected value of  $S_{PS}$ . Using Equation (1.1) and assuming an equilibrium heritability,  $h^2 = 0.8$  and a spousal correlation,  $r = 0.25$ , we expect  $S_{PS}$  to be  $\sim 1 - 0.8 \times 0.25 = 0.8$ , which is consistent with our observations (**Suppl. Fig. 5d**).

Altogether, these analyses show that estimated SNP effects from our EUR GWAS are inflated by  $\sim 10-20\%$  relative to that from a family-based GWAS and that this inflation is not larger than expected because of phenotypic AM on height.

### **Assessment of population stratification in non-European ancestries GWAS**

We extended the previous analyses performed in EUR to quantify the impact of residual PS in GWAS of height performed in the four other ancestry groups, i.e. HIS, SAS, EAS and AFR.

#### **LD score regression analysis of non-European ancestries GWAS**

We performed LD score regression analyses using LD scores estimated from the same ancestry-matched samples as in our COJO analyses (i.e. 10,636 AFR samples, 5,875 EAS samples, 9,448 SAS

samples and 4,883 HIS samples). LD scores were calculated from imputed HapMap3 SNPs using the LDSC software (version 1.0.1) with a window size of 1 cM.

The  $R_{LDSC}$  statistic was 6.7% (S.E. 2.2%) in AFR, 9.5% (S.E. 1.4%) in HIS, 11.1% (S.E. 1.7%) in EAS, and 25.6% (S.E. 3.7%) in SAS. Previous studies have shown that longer range LD in admixed populations as compared to non-admixed populations can bias estimates from LD score regression.<sup>8</sup> Therefore, we repeated our analyses in AFR and HIS using 20 PCs adjusted LD scores based on a 20 cM window, as recommended by Luo et al. (2021).<sup>8</sup> The  $R_{LDSC}$  statistic decreased from 6.7% (S.E. 2.2%) to 0.9% (S.E. 1.9%) in AFR and from 9.5% (S.E. 1.4%) to 7.5% (S.E. 1.7%) in HIS. Importantly, using PC adjusted LD scores based on a 20cM window did not change estimates of  $R_{LDSC}$  in SAS (25.6%; S.E. 3.7% vs. 25.9%; S.E. 3.7%) nor in EAS (11.1%; S.E. 1.7% vs. 11.1%; S.E. 1.7%).

It is noteworthy that values of  $R_{LDSC}$  above 20%\* as observed in our SAS GWAS may also reflect strong LD differences between GWAS participants and samples used to estimate LD scores. We applied the DENTIST method (Detecting Errors iN analyses of summary staTISTics) to distinguish these two potential explanations. In brief, DENTIST compares the observed distribution of Z-scores from GWAS to an expected distribution based on a reference LD matrix. Deviations from that expected distribution reflect errors in the GWAS summary statistics or inconsistencies in LD patterns. DENTIST detected 213 outlier SNPs in the SAS GWAS ( $P < 5 \times 10^{-8}$ ) relative to LD patterns from 9,448 unrelated SAS from the UKB. However, excluding these 213 outliers SNPs did not substantially affect the value of the  $R_{LDSC}$  statistic (26.2%; S.E. 3.6%).

Altogether, these LD score regression analyses suggest the presence of residual PS that might potentially confound estimates of SNP effects in our HIS, EAS and SAS GWAS.

### ***Correlation between for height-increasing alleles frequencies and genetic differentiation within four ancestry groups***

Next, we estimated  $\beta_{PS}$  for each non-EUR GWAS meta-analysis along various axes of within-continent genetic differentiation defined by pairs of 1KGP subpopulations. For example, we estimated  $\beta_{PS}$  in our AFR GWAS meta-analysis along an axis that differentiates Yoruba populations in Nigeria (West Africa) from Luhya populations in Kenya (East Africa), as well as in our EAS GWAS meta-analysis along an axis that differentiates Japanese populations from Han Chinese populations. We used ancestry-specific significance thresholds calculated as 0.05 divided by the number of pairs of subpopulations within the corresponding 1KGP ancestry group. More specifically, we considered 7 subpopulations in AFR (21 pairs), 5 subpopulations in EAS (10 pairs), 5 subpopulations in SAS (10 pairs) and 4 subpopulations in HIS (6 pairs).

We found significant  $\beta_{PS}$  in each non-EUR GWAS meta-analysis (**Suppl. Fig. 6a-d**). The largest magnitude of  $\beta_{PS}$  was observed in the SAS GWAS meta-analysis along the India-Bangladesh axis ( $\beta_{PS}=0.89\%$ , S.E. 0.11%,  $P=6.2 \times 10^{-17}$ , **Suppl. Fig. 6c**) and the second largest in the HIS GWAS meta-analysis along the Colombia-Puerto Rico axis ( $\beta_{PS}=0.75\%$ , S.E. 0.08%,  $P=1.2 \times 10^{-17}$ , **Suppl. Fig. 6d**). Importantly, estimated  $\beta_{PS}$  in non-EUR are significantly lower than 1.28% observed in the Wood et al. (2014) study.

Finally, we assessed the squared correlation between SNP effects estimated in each non-EUR GWAS meta-analysis and SNP loadings of 20 PCs calculated in corresponding superpopulations from 1KGP (**Suppl. Fig. 6e-h**). Overall, all squared correlations were smaller than 0.3% as observed with our largest EUR GWAS (N=4M), where PS was better controlled (**Suppl. Fig. 5c**).

---

\*a rule-of-thumb recommended by the authors of the LDSC software.

In conclusion, we detected a small amount residual PS in all non-EUR GWAS meta-analyses, in particular in SAS (smallest sample size).

### ***Effect of residual population stratification on cross-ancestry GWAS meta-analysis***

In this final section, we focus on SNP effects from our cross-ancestry GWAS meta-analysis (referred to as META<sub>FE</sub> in the main text). Using these estimated SNP effects, we quantified  $\beta_{PS}$  along multiple axes of within-continent genetic differentiation and also the squared correlations between SNP effects and within-ancestry PC loadings and SNP effects (as in the previous section). Overall,  $\beta_{PS}$  remain below 0.5% across all pairs of 1KGP subpopulations (Suppl. Fig. 7a-e), and the squared correlation between SNP effects and PC loadings was also smaller than 0.15% (Suppl. Fig. 7f).

In summary, the various analyses shown here demonstrate that residual PS has a minimal confounding effect on estimated SNP effects from our cross-ancestry GWAS meta-analysis.

### Supplementary Note 3: Distinguishing loss of tagging from multiplicity of causal variants at the *ACAN* locus

We observed the largest density of independent associations around rs4932198, where 24 other GWS SNPs were detected within less than 100 kb on each side (Fig. 2; Suppl. Fig. 17). We hereafter refer to the set of these 25 GWS SNPs as *ACAN* GWAS signals. A large density of signals may reflect the presence of multiple causal variants or the presence of poorly tagged causal variants with large effects at this locus. To disentangle these two possible explanations, we first used statistically phased haplotypes from 346,959 unrelated UKB participants of EUR and tested their association with height. We analysed 14,117 haplotypes covering a 100 kb long genomic region at this locus (hg19 genomic coordinates: chr15:89,307,521-89,407,521) and that were present in at least 5 UKB participants. We tested the association between each haplotype and height but could not identify a single haplotype with a large enough effect that can explain the majority of signals at this locus (Extended Data Fig. 5). In fact, *ACAN* GWAS signals cumulatively explain ~0.3% of height variance, while the two most associated haplotypes ( $P < 10^{-7}$ ) jointly only explain 0.01% of height variance.

Next, we used genotypes at this locus from 291,683 unrelated EUR participants of the UKB to simulate a trait controlled by a single rare biallelic variant ( $MAF < 1\%$ ) explaining between  $\eta^2 = 0.5\%$  and 5% of variance, then performed a GCTA-COJO analysis to estimate the density of independent signals. Previous studies have shown that large discrepancies in sample size between discovery GWAS and LD reference may contribute to inflate the number of independent associations detected with GCTA-COJO.<sup>69</sup> Therefore, to mimic that effect we used a random subset of 10,000 unrelated EUR participants of the UKB as LD reference, i.e.  $\sim 1/30^{\text{th}}$  of the discovery sample. On average over 100 simulation replicates for each value of  $\eta^2$ , we observed a signal density lower than 2.3 associations per 100kb (Extended Data Fig. 5). The largest density of 10 associations per 100 kb was observed only when the simulated causal variant explains 5% of trait variance (i.e.  $\beta$  between  $\sim 2$  and  $\sim 43$  trait SD/allele), which is an extreme and unrealistic scenario. In contrast, even when the simulated causal variant explains 0.5% of trait variance, which in this case corresponds to a median allelic effect of  $\sim 1.4$  SD/allele ( $\sim 10\text{cm}$ , so very large) across simulations, we found that signal density never exceeded 7 associations per 100 kb. Altogether, the results of our haplotype- and simulation-based analyses suggest that a multiplicity of independent causal variants is the most likely explanation of our observations, although signal density is not a standard estimator of the number of causal variants.

Finally, we sought to quantify how much the presence of a recently identified<sup>21,70</sup> height-associated variable-number-of-tandem-repeat (VNTR) polymorphism in *ACAN* may contribute to the observed density of GWS SNPs. Therefore, we regressed VNTR length imputed in UKB participants<sup>28</sup> onto allele counts at *ACAN* GWAS signals and found that these 25 SNPs explain ~73%, ~47%, ~42% and ~40% of VNTR length variation in SAS (N=9,219), EUR (N=414,429), AFR (N=7,543) and EAS (N=1,496) respectively (Extended Data Fig. 5e). Consistent with partial tagging of VNTR length variation, *ACAN* GWAS signals explain ~0.24% ( $R^2_{VNTR} = 0.21\%$  vs.  $R^2_{VNTR+25\text{ SNPs}} = 0.45\%$ ;  $P = 8.7 \times 10^{-55}$ ) additional height variance in EUR over what is explained by VNTR length variation alone (Extended Data Fig. 5f). In summary, these complementary analyses suggest that a large density of independent GWS SNPs near *ACAN* is partially explained by the presence of a VNTR at this locus and also by additional causal variants not yet identified.

## Supplementary Note 4: Optimal weighting of PGS and parental information to maximize prediction accuracy in the presence of assortative mating

### Overview of theory, simulations and application to real data from the UK Biobank

For a given individual, we denote  $y$  their phenotype,  $y_m$  and  $y_f$  the phenotypes of their mother and father respectively,  $\bar{y}_p = (y_m + y_f)/2$  the average of their parents' phenotypes and  $\hat{y}$  their own PGS. We consider combined predictor that is a linear combination of  $\hat{y}$  and  $\bar{y}_p$ . Under the assumption that the resemblance between relatives is solely due to genetic factors, our main result is that the optimal weighting  $\alpha_{\text{PGS}}\hat{y} + \alpha_{\text{PA}}\bar{y}_p$  is given by

$$(S3.1) \quad \alpha_{\text{PGS}} = \frac{R_{\hat{y},y}[1 - h^2(1 + r)/2]}{1 - R_{\hat{y},y}^2(1 + r)/2}$$

and

$$(S3.2) \quad \alpha_{\text{PA}} = \frac{h^2 - R_{\hat{y},y}^2}{1 - R_{\hat{y},y}^2(1 + r)/2}$$

where  $h^2$  denotes the heritability of the trait in the current population,  $r$  the correlation between spouses phenotypes in the population, and  $R_{\hat{y},y}^2 = \text{corr}(\hat{y}, y)^2$ , the prediction accuracy of the PGS. The expected accuracy ( $R_{\hat{y}+\bar{y}_p}^2$ ) of the combined predictor using these optimal weights, is given by

$$(S3.3) \quad R_{\hat{y}+\bar{y}_p}^2 = \frac{R_{\hat{y},y}^2 + \left(\frac{h^2}{2}\right)(1 + r)[h^2 - 2R_{\hat{y},y}^2]}{1 - R_{\hat{y},y}^2(1 + r)/2}$$

**Supl. Fig. 20** shows the results of simulations performed to verify the results from Equations (S3.1-S3.3). These simulations use an arbitrary number of SNPs included in the PGS and are not designed to match the number of SNPs used in various PGS analyses presented in the main text. Nevertheless, our conclusions are general and applicable to our empirical data under the assumption that each SNP in the PGS contributes about the same amount of genetic variance. We define the regression weights as  $\omega_{\text{PGS}} = \alpha_{\text{PGS}}/(\alpha_{\text{PGS}} + \alpha_{\text{PA}})$  and  $\omega_{\text{PA}} = \alpha_{\text{PA}}/(\alpha_{\text{PGS}} + \alpha_{\text{PA}})$ . Therefore, values of  $\omega_{\text{PGS}}$  such that  $\omega_{\text{PGS}} > 0.5$  imply that the PGS has a stronger weight than the parental average.

Under assortative mating, **Supl. Fig. 20** shows that  $\omega_{\text{PA}}$  remains above 0.5 even when the PGS explains 50% of  $h^2$ . We show below that  $\omega_{\text{PGS}} = \omega_{\text{PA}}$  if

$$(S3.4) \quad R_{\hat{y},y} = \frac{-[1 - h^2(1 + r)/2] + \sqrt{[1 - h^2(1 + r)/2]^2 + 4h^2}}{2}$$

For example, with  $r = 0.25$  and  $h^2 = 0.8$ , Equation (S3.4) predicts an equal contribution of the PGS and parental information if  $R_{\hat{y},y} \approx 0.46$ .

Next, we estimated  $\alpha_{\text{PGS}}$ ,  $\alpha_{\text{PA}}$  and  $R_{\hat{y}+\bar{y}_p}^2$  in 981 trios from the UK Biobank (**Methods**). For this analysis, we used a PGS based on 12,111 GWS SNPs identified in our largest GWAS meta-analysis. We found  $\hat{\alpha}_{\text{PGS}} \sim 0.375$  (S.E. = 0.025) and  $\hat{\alpha}_{\text{PA}} \sim 0.634$  (S.E. = 0.034). The variance explained by fitting both predictors is  $\hat{R}_{\hat{y}+\bar{y}_p}^2 = 0.542$  (S.E. = 0.032), which is larger than the accuracy of each single predictor ( $R_{\hat{y}}^2 = 0.38$ , S.E. 0.031; and  $R_{\bar{y}_p}^2 = 0.439$ , S.E. 0.032). Next, we estimated the spousal correlation  $\hat{r} = 0.233$  (S.E. = 0.031) and the heritability  $\hat{h}^2 = 0.894$  (S.E. = 0.032) using mid-parent regression. Besides, the prediction accuracy of the PGS is  $\hat{R}_{\hat{y},y}^2 \sim 0.4$ . Therefore, from these estimates of  $r$ ,  $h^2$  and  $R_{\hat{y},y}^2$

we predict using Equations (S3.1-S3.3) that  $\alpha_{\text{PGS}} = 0.377$ ,  $\alpha_{\text{PA}} = 0.656$  and  $R_{\hat{y}+\bar{y}_p}^2 = 0.599$ . These three predictions are not statistically distinct from estimated values, which further validates our model.

### Proof of theoretical results

The linear combination ( $y_{\text{opt}}$ ) of  $\hat{y}$  and  $\bar{y}_p$  that maximises prediction of  $y$  is derived from multivariate linear regression theory:

$$(3.1) \quad y_{\text{opt}} = \alpha_{\text{PGS}}\hat{y} + \alpha_{\text{PA}}\bar{y}_p$$

where

$$(3.2) \quad \alpha_{\text{PGS}} = \frac{\text{var}(\bar{y}_p)\text{cov}(\hat{y}, y) - \text{cov}(\hat{y}, \bar{y}_p)\text{cov}(\bar{y}_p, y)}{\text{var}(\bar{y}_p)\text{var}(\hat{y}) - \text{cov}(\hat{y}, \bar{y}_p)^2} = \frac{\text{var}(\bar{y}_p)\text{var}(\hat{y})}{\text{var}(\bar{y}_p)\text{var}(\hat{y})} \times \frac{\text{cov}(\hat{y}, y)/\text{var}(\hat{y}) - \frac{\text{cov}(\hat{y}, \bar{y}_p)\text{cov}(\bar{y}_p, y)}{\text{var}(\bar{y}_p)\text{var}(\hat{y})}}{1 - [\text{cov}(\hat{y}, \bar{y}_p)]^2/[\text{var}(\bar{y}_p)\text{var}(\hat{y})]}$$

and

$$(3.3) \quad \alpha_{\text{PA}} = \frac{\text{var}(\hat{y})\text{cov}(\bar{y}_p, y) - \text{cov}(\hat{y}, \bar{y}_p)\text{cov}(\hat{y}, y)}{\text{var}(\bar{y}_p)\text{var}(\hat{y}) - \text{cov}(\hat{y}, \bar{y}_p)^2} = \frac{\text{var}(\bar{y}_p)\text{var}(\hat{y})}{\text{var}(\bar{y}_p)\text{var}(\hat{y})} \times \frac{\text{cov}(\bar{y}_p, y)/\text{var}(\bar{y}_p) - \frac{\text{cov}(\hat{y}, \bar{y}_p)\text{cov}(\hat{y}, y)}{\text{var}(\bar{y}_p)\text{var}(\hat{y})}}{1 - [\text{cov}(\hat{y}, \bar{y}_p)]^2/[\text{var}(\bar{y}_p)\text{var}(\hat{y})]}$$

Without loss of generality, we assume that  $y$  and  $\hat{y}$  are both centred (i.e.  $E[y] = E[\hat{y}] = 0$ ) and scaled (i.e.  $\text{var}[y] = \text{var}[\hat{y}] = 1$ ). Assuming that  $\text{var}[y] = 1$  implies that  $\text{var}[\bar{y}_p] = (1 + r)/2$ , where  $r$  denotes the phenotypic correlation between mates in the population.

We also denote  $R_{\hat{y},y} = \text{corr}(\hat{y}, y) = \text{cov}(\hat{y}, y)$ ,  $R_{\bar{y}_p,y} = \text{corr}(\bar{y}_p, y)$  and  $R_{\hat{y},\bar{y}_p} = \text{corr}(\bar{y}_p, \hat{y})$ . Therefore, Equations (3.2) and (3.3) simplify as

$$(3.2') \quad \alpha_{\text{PGS}} = \frac{\text{cov}(\hat{y}, y)/\text{var}(\hat{y}) - \frac{\text{cov}(\hat{y}, \bar{y}_p)}{\sqrt{\text{var}(\bar{y}_p)\text{var}(\hat{y})}} \times \frac{\text{cov}(\bar{y}_p, y)}{\sqrt{\text{var}(\bar{y}_p)\text{var}(y)}} \times \sqrt{\frac{\text{var}(y)}{\text{var}(\hat{y})}}}{1 - R_{\hat{y},\bar{y}_p}^2} = \frac{R_{\hat{y},y} - R_{\hat{y},\bar{y}_p}R_{\bar{y}_p,y}}{1 - R_{\hat{y},\bar{y}_p}^2}$$

and

$$(3.3') \quad \alpha_{\text{PA}} = \frac{\frac{\text{cov}(\bar{y}_p, y)}{\sqrt{\text{var}(\bar{y}_p)\text{var}(y)}} \times \sqrt{\frac{\text{var}(y)}{\text{var}(\bar{y}_p)}} - \frac{\text{cov}(\hat{y}, \bar{y}_p)}{\sqrt{\text{var}(\bar{y}_p)\text{var}(\hat{y})}} \times \frac{\text{cov}(\hat{y}, y)}{\sqrt{\text{var}(\hat{y})\text{var}(y)}} \times \sqrt{\frac{\text{var}(y)}{\text{var}(\bar{y}_p)}}}{1 - R_{\hat{y},\bar{y}_p}^2}$$

$$= \sqrt{\frac{2}{1+r}} \left( \frac{R_{\bar{y}_p,y} - R_{\hat{y},\bar{y}_p}R_{\hat{y},y}}{1 - R_{\hat{y},\bar{y}_p}^2} \right)$$

and further as

$$(3.2'') \quad \alpha_{\text{PGS}} = \frac{R_{\hat{y},y} - R_{\hat{y},\bar{y}_p}R_{\bar{y}_p,y}}{1 - R_{\hat{y},\bar{y}_p}^2}$$

and

$$(3.3'') \quad \alpha_{\text{PA}} = \sqrt{\frac{2}{1+r}} \left( \frac{R_{\bar{y}_p,y} - R_{\hat{y},\bar{y}_p}R_{\hat{y},y}}{1 - R_{\hat{y},\bar{y}_p}^2} \right)$$



Equations (3.2'') and (3.3'') are expressed in function of  $R_{\hat{y},y}$ ,  $R_{\bar{y}_p,y}$ ,  $R_{\hat{y},\bar{y}_p}$  and  $r$ .

We assume that  $R_{\hat{y},y}$  is known, e.g., from quantifying the accuracy of the PGS in some validation sample. If we denote  $h^2$  as heritability in the current population (which could be undergoing assortative mating, i.e.  $r \neq 0$ ) and assume no shared environmental effects between parents and offspring then

$$(3.4) \quad h^2 = \text{cov}(\bar{y}_p, y) / \text{var}(\bar{y}_p) \Rightarrow R_{\bar{y}_p,y} = h^2 \sqrt{\frac{1+r}{2}}$$

Finally, denote  $\hat{y}_p$  as the average PGS of parents. We can express  $\bar{y}_p$  as a function of  $\hat{y}_p$  as follows

$$(3.5) \quad \bar{y}_p = \frac{\text{cov}(\bar{y}_p, \hat{y}_p)}{\text{var}(\hat{y}_p)} \hat{y}_p + \varepsilon_p$$

where  $\varepsilon_p$  is a residual term with mean 0 and such that  $\text{cov}(\varepsilon_p, \hat{y}_p) = 0$ . Given that both phenotypes and PGS are centred,  $\text{cov}(\bar{y}_p, \hat{y}_p)$  can be expressed as

$$\text{cov}(\bar{y}_p, \hat{y}_p) = \frac{1}{4} E[y_m \hat{y}_m + y_f \hat{y}_f + y_f \hat{y}_m + y_m \hat{y}_f] = \frac{1}{2} E[R_{\hat{y},y} + E[y_f \hat{y}_m | y_m]] = R_{\hat{y},y}(1+r)/2$$

Using a similar reasoning, we can show that  $\text{var}(\hat{y}_p) = (1 + rR_{\hat{y},y}^2)/2$ . Therefore, Equation (3.5) can be rewritten as

$$(3.5') \quad \bar{y}_p = R_{\hat{y},y} \left( \frac{1+r}{1+rR_{\hat{y},y}^2} \right) \hat{y}_p + \varepsilon_p$$

Besides, we can also write

$$(3.6) \quad \hat{y} = \hat{y}_p + \varepsilon_m,$$

where  $\varepsilon_m$  (Mendelian segregation) is independent of  $\hat{y}_p$ . Combining Equations (3.5') and (3.6) leads to

$$(3.7) \quad \text{cov}(\bar{y}_p, \hat{y}) = R_{\hat{y},y} \left( \frac{1+r}{1+rR_{\hat{y},y}^2} \right) \text{cov}(\hat{y}_p, \hat{y}) + \text{cov}(\hat{y}, \varepsilon_p) = R_{\hat{y},y} \left( \frac{1+r}{1+rR_{\hat{y},y}^2} \right) \text{var}(\hat{y}_p) + \text{cov}(\varepsilon_m, \varepsilon_p)$$

which, assuming  $\text{cov}(\varepsilon_m, \varepsilon_p) = 0$ , implies that  $\text{cov}(\bar{y}_p, \hat{y}) = R_{\hat{y},y} \left( \frac{1+r}{1+rR_{\hat{y},y}^2} \right) \text{var}(\hat{y}_p) = R_{\hat{y},y}(1+r)/2$ .

Therefore,

$$(3.8) \quad R_{\bar{y}_p,\hat{y}} = \text{corr}(\bar{y}_p, \hat{y}) = \frac{R_{\hat{y},y}(1+r)}{\sqrt{2(1+r)}}.$$

It follows that

$$R_{\bar{y}_p,\hat{y}}^2 = \frac{R_{\hat{y},y}^2(1+r)^2}{2(1+r)} = R_{\hat{y},y}^2(1+r)/2 \Leftrightarrow \frac{1}{1-R_{\bar{y}_p,\hat{y}}^2} = \frac{1}{1-R_{\hat{y},y}^2(1+r)/2}$$

We now express below  $\alpha_{\text{PGS}}$  and  $\alpha_{\text{PA}}$  as a function of  $h^2$ ,  $R_{\hat{y},y}$ , and  $r$ .

We first recall that  $\alpha_{\text{PGS}} = \frac{R_{\hat{y},y} - R_{\hat{y},\bar{y}_p} R_{\bar{y}_p,y}}{1 - R_{\hat{y},\bar{y}_p}^2}$

$$R_{\hat{y},\bar{y}_p} R_{\bar{y}_p,y} = \frac{R_{\hat{y},y}(1+r)}{\sqrt{2(1+r)}} \times h^2 \sqrt{\frac{1+r}{2}} = R_{\hat{y},y} h^2 (1+r)/2.$$

$$R_{\hat{y},y} - R_{\hat{y},\bar{y}_p} R_{\bar{y}_p,y} = R_{\hat{y},y} [1 - h^2(1+r)/2].$$

To calculate  $\alpha_{\text{PA}} = \sqrt{\frac{2}{1+r}} \left( \frac{R_{\bar{y}_p,y} - R_{\hat{y},\bar{y}_p} R_{\hat{y},y}}{1 - R_{\hat{y},\bar{y}_p}^2} \right)$

$$\sqrt{\frac{2}{1+r}} (R_{\bar{y}_p,y} - R_{\hat{y},\bar{y}_p} R_{\hat{y},y}) = \sqrt{\frac{2}{1+r}} \left[ h^2 \sqrt{\frac{1+r}{2}} - \frac{R_{\hat{y},y}^2 (1+r)}{\sqrt{2(1+r)}} \right] = h^2 - \frac{R_{\hat{y},y}^2 (1+r)}{1+r} = h^2 - R_{\hat{y},y}^2$$

Finally,

$$(3.2''') \quad \alpha_{\text{PGS}} = \frac{R_{\hat{y},y} - R_{\hat{y},\bar{y}_p} R_{\bar{y}_p,y}}{1 - R_{\hat{y},\bar{y}_p}^2} = \frac{R_{\hat{y},y} [1 - h^2(1+r)/2]}{1 - R_{\hat{y},y}^2 (1+r)/2}$$

and

$$(3.3''') \quad \alpha_{\text{PA}} = \sqrt{\frac{2}{1+r}} \left( \frac{R_{\bar{y}_p,y} - R_{\hat{y},\bar{y}_p} R_{\hat{y},y}}{1 - R_{\hat{y},\bar{y}_p}^2} \right) = \frac{h^2 - R_{\hat{y},y}^2}{1 - R_{\hat{y},y}^2 (1+r)/2}$$

Special case:  $r = 0$

$$\alpha_{\text{PGS}} = \frac{R_{\hat{y},y} [1 - h^2/2]}{1 - R_{\hat{y},y}^2/2} \quad \text{and} \quad \alpha_{\text{PA}} = \frac{h^2 - R_{\hat{y},y}^2}{1 - R_{\hat{y},y}^2/2}$$

The relative contribution of  $\hat{y}$  and  $\bar{y}_p$ , defined above as  $\omega_{\text{PGS}} = \alpha_{\text{PGS}}/(\alpha_{\text{PGS}} + \alpha_{\text{PA}})$  and  $\omega_{\text{PA}} = \alpha_{\text{PA}}/(\alpha_{\text{PGS}} + \alpha_{\text{PA}})$  can be expressed as

$$\omega_{\text{PGS}} = \frac{R_{\hat{y},y} [1 - h^2(1+r)/2]}{R_{\hat{y},y} [1 - h^2(1+r)/2] + h^2 - R_{\hat{y},y}^2} \quad \text{and} \quad \omega_{\text{PA}} = \frac{h^2 - R_{\hat{y},y}^2}{R_{\hat{y},y} [1 - h^2(1+r)/2] + h^2 - R_{\hat{y},y}^2}$$

These two relative contributions are equal when  $\omega_{\text{PA}} = \omega_{\text{PGS}} = 1/2$ , i.e. when

$$2h^2 - 2R_{\hat{y},y}^2 = R_{\hat{y},y} [1 - h^2(1+r)/2] + h^2 - R_{\hat{y},y}^2 \Leftrightarrow R_{\hat{y},y}^2 + R_{\hat{y},y} [1 - h^2(1+r)/2] - h^2$$

or equivalently, when

$$R_{\hat{y},y} = \frac{-[1 - h^2(1+r)/2] + \sqrt{[1 - h^2(1+r)/2]^2 + 4h^2}}{2}$$

This therefore proves Equation (S3.4).

### Prediction accuracy from a linear regression model fitting both PGS and parental average

The expected prediction accuracy ( $R_{\hat{y}+\bar{y}_p}^2$ ) from combining PGS and parental information can be expressed as

$$R_{\hat{y}+\bar{y}_p}^2 = \alpha_{\text{PGS}} \text{cov}(\hat{y}, y) + \alpha_{\text{PA}} \text{cov}(\bar{y}_p, y) = \frac{R_{\hat{y},y}^2 [1-h^2(1+r)/2] + h^2(h^2 - R_{\hat{y},y}^2)(1+r)/2}{1-R_{\hat{y},y}^2(1+r)/2}$$

which can be simplified as

$$(3.9) \quad R_{\hat{y}+\bar{y}_p}^2 = \frac{R_{\hat{y},y}^2 + \left(\frac{h^2}{2}\right)(1+r)[h^2 - 2R_{\hat{y},y}^2]}{1-R_{\hat{y},y}^2(1+r)/2}$$

### Prediction accuracy and proportion of causal variants captured

We assume that the trait of interest is underlain by  $M$  independent causal SNPs and that  $m$  ( $m \leq M$ ) of them are included in a PGS. Moreover, we assume that the population has been undergoing assortative mating for multiple generations, until an equilibrium is reached. We derive below how large  $m$  needs to be for the prediction accuracy of the derived PGS, in the equilibrium population, to equal  $R_{\hat{y},y}^2$ .

We denote  $\rho = rh^2$ ,  $f_0 = m/M$ ,  $\gamma = \rho/(1-\rho)$ ,  $\alpha = \gamma/(2M)$  the expected correlation between trait-increasing alleles induced by assortative mating, and  $\sigma_{g,0}^2$  and  $\sigma_{g,\text{eq}}^2$  the genetic variances in a randomly and assortatively mating populations, respectively.

In the equilibrium population, the variance of the PGS can be expressed as

$$(Int. 3.1) \quad \text{var}(\hat{y}) \approx \sigma_{g,0}^2 f_0 (1 + \gamma f_0), \text{ and the covariance between } y \text{ and } \hat{y} \text{ as}$$

$$(Int. 3.2) \quad \text{cov}(\hat{y}, y) \approx \sigma_{g,0}^2 f_0 (1 + \gamma).$$

Equations (Int. 3.1) and (Int. 3.2) are proven below.

Therefore,

$$(3.10) \quad R_{\hat{y},y}^2 = \frac{\text{cov}(\hat{y}, y)^2}{\text{var}(\hat{y})\text{var}(y)} \approx \sigma_{g,0}^2 f_0 \frac{(1 + \gamma)^2}{1 + \gamma f_0}$$

We divide the previous equation by  $\sigma_{g,\text{eq}}^2$  and define  $\phi_{eq} = R_{\hat{y},y}^2 / \sigma_{g,\text{eq}}^2$ . Therefore, Equation (3.10) implies that

$$(3.11) \quad (1 + \gamma f_0) \phi_{eq} \approx \left( \frac{\sigma_{g,0}^2}{\sigma_{g,\text{eq}}^2} \right) f_0 (1 + \gamma)^2 = f_0 (1 - \rho) (1 + \gamma)^2 \Leftrightarrow f_0 \approx \frac{\phi_{eq}}{(1 - \rho)(1 + \gamma)^2 - \gamma \phi_{eq}}$$

where  $\phi_{eq} = R_{\hat{y},y}^2 / \sigma_{g,\text{eq}}^2$ . Note that  $\sigma_{g,\text{eq}}^2 / \sigma_{g,0}^2$  is the inflation in genetic variance due to assortative mating, which is predicted in theory to equal  $1/(1-\rho)$ .

Using a similar reasoning, Yengo et al.<sup>71</sup> (Eq. 1.20 in their Supplementary Note) derived the relationship between  $f_0$  and the proportion  $f_{eq} = h_{\text{SNP}}^2 / h^2$  of equilibrium heritability explained by the  $m$  SNPs included in the PGS as:

$$(3.12) \quad f_0 = \frac{1-\rho}{2\rho} \left[ \sqrt{\left(1 + \frac{4f_{eq}\rho}{(1-\rho)^2}\right)} - 1 \right] \Big|_{|\rho| \ll 1} \approx f_{eq} / (1 - \rho).$$

### Proof of Equation (Int. 3.1) and (Int. 3.2)

We assume an infinitesimal model, where each causal SNP explains the same amount of trait variance. For simplicity, we assume the squared effect size of each causal SNP to equal  $b^2 = \sigma_{g,0}^2 / M$ ; and that SNP

effects are estimated with negligible errors so that they could be assumed to be equal to their true value. Finally, we assume that the  $m$  first SNPs are included in the PGS.

Under these assumptions, the PGS (i.e.  $\hat{y}$ ) can be written as

$$\hat{y} = \left( \frac{\sigma_{g,0}^2}{M} \right) \sum_{j=1}^m z_j$$

where  $(z_j - 2p_j)/\sqrt{2p_j(1-p_j)}$  is the centred and scaled count of trait-increasing allele at SNP  $j$  and  $p_j$  the trait-increasing allele frequency at that same SNP. By definition, we have that  $\text{var}(z_j) = 1 + \alpha$ , and that  $\text{cov}(z_j, z_k) = 2\alpha$ . It follows that

$$\text{var}(\hat{y}) = \frac{\sigma_{g,0}^2}{M} [m(1 + \alpha) + m(m-1)2\alpha] = \sigma_{g,0}^2 \left( \frac{m}{M} \right) [1 + (2m-1)\alpha] = \sigma_{g,0}^2 f_0 \left[ 1 + \left( f_0 - \frac{1}{2M} \right) (2M\alpha) \right]$$

For large values of  $M$ , this simplifies as  $\text{var}(\hat{y}) \approx \sigma_{g,0}^2 f_0 (1 + \gamma f_0)$ .

Similarly, we can write  $\text{cov}(\hat{y}, y)$  as  $\text{cov}(\hat{y}, y) = \frac{\sigma_{g,0}^2}{M} [m(1 + \alpha) + m(M-1)2\alpha] \approx \sigma_{g,0}^2 f_0 (1 + \gamma)$ .

## Supplementary Note 5: Saturation of GWAS signals within pathways and gene sets

### Overview and main results

We assessed the enrichment of broad categories of biological pathways for different GWAS sample sizes, using two different gene set enrichment methods, DEPICT<sup>42</sup> and MAGMA.<sup>43</sup> Specifically, we evaluated the prioritization of 14,462 gene sets, hierarchically clustered into 20 groups of related gene sets based on gene set membership (see Methods below, **Suppl. Fig. 21, Suppl. Table 13**). We observed an enrichment of OMIM genes in clusters 1, 2, 5, 6, 11, 16, and 17 (Bonferroni  $P < 0.05$  vs. random genes (**Extended Data Fig. 8, Suppl. Table 14**). At all sample sizes tested (range  $N=130,010$  to  $N=5,314,291$ ), similar sets of the clusters consistently showed significant enrichments in DEPICT (clusters 2, 5, 11, 16, and 17) and MAGMA-prioritized gene sets (clusters 5, 11, 16, and 17; **Suppl. Fig. 21**). Thus, the broad patterns of gene set enrichment are apparent even at moderate sample sizes and remain quite stable as sample sizes increase.

In contrast with clusters of gene sets, individual genes may require larger sample sizes or multiple ancestries to be implicated by GWAS. To address these questions, we assessed the fraction of OMIM genes that contain an approximately independent genome-wide significant signal (identified with COJO) across the range of GWAS sample sizes. As sample size increases and the number of independent signals increases, the percent of the 462 OMIM genes overlapping a signal also increases (**Suppl. Fig. 23b**); however, after subtracting the null background from randomly sampled sets of 462 genes, the percentage above background of OMIM genes that overlap GWAS signal plateaus at a sample size of  $\sim 2.5$  M (**Suppl. Fig. 23c**). In comparing the trans-ancestry meta-analysis with the largest European-ancestry-only GWAS with, we did not observe a noticeable increase in overlapping OMIM genes above background.

We also sought to examine more directly whether the height GWAS results implicate highly similar biology across different continental ancestries. We used MAGMA and DEPICT to prioritize genes based on GWAS results for EUR, EAS, and AA ancestries. We then compared the enrichment of heritability with stratified LD score regression (LDSC)<sup>39,40</sup> for each set of prioritized genes, evaluated either in the same ancestry or in the other two ancestries. Genes prioritized in one ancestry by both MAGMA and DEPICT showed comparable enrichment of heritability when evaluated either in that ancestry or in the other two ancestries (**Suppl. Fig. 22, Suppl. Table 15**), strongly confirming the shared biology implicated by GWAS results from different ancestries.

### Methods

#### Evaluation of gene set enrichment analysis (GSEA) methods across sample sizes.

For GWAS summary statistics from multiple sample sizes (**Tables 1 - 2**) two GSEA approaches were applied (DEPICT and MAGMA). DEPICT release 173 was used; the top 1000 SNPs pruned by p-value from each set of summary statistics were used as input for each sample. MAGMA version v1.07b was used; SNPs were annotated with genes within 100kb, and genes were removed if the missingness of their pathway membership was over 0.2.

To evaluate the ability of GSEA methods to identify groups of gene sets at different sample sizes, 14,462 gene sets, each consisting of Z-scores for 19,987 genes (gene sets selected and gene membership Z-scores calculated in ref.<sup>42</sup>), were hierarchically clustered into 20 clusters as follows. Pairwise distances between gene sets were defined as the Euclidean distance between the gene sets' Z-scores and the elbow method was used to choose the number of clusters, evaluating average distances between cluster centroids as the number of clusters is varied (**Suppl. Fig. 21**). For DEPICT and MAGMA, enrichment of prioritization in each cluster was defined as the number of prioritized gene sets in each cluster divided by the size of each cluster; a gene set was considered prioritized if it was in the top 10% of gene sets as prioritized by the GSEA method. Enrichment of OMIM genes in each gene set was defined as the number of OMIM genes in each gene set divided by the size of each gene set divided by the proportion of all genes in OMIM, and then enrichment of OMIM genes in each cluster was defined as the average of the

enrichment of OMIM genes in each gene set in that cluster. Genes were defined to be “in a gene set” if the gene’s gene-set Z-score is  $> 1.96$ , as described previously.<sup>72</sup> Null distributions for each cluster were generated by randomly selected prioritized gene sets (for DEPICT and MAGMA) or prioritized genes to evaluate enrichment significance.

To evaluate saturation of height-associated gene identification, the percentage of OMIM genes overlapping independent COJO signals was calculated. “Overlapping” was defined as having at least one COJO SNP within the gene body, as defined with the plink version 1.9 hg19 gene list (URL: <https://www.cog-genomics.org/static/bin/plink/glist-hg19>). A null distribution was calculated by drawing an equivalent number of random genes (binned by size into 20 bins, same number of genes per bin) to match OMIM genes, and calculating the percent of the random genes near a COJO SNP.

#### Benchmarking of gene prioritization across different ancestries

We applied DEPICT and MAGMA to prioritize genes on height GWAS of European, African-American and East Asian ancestry, resulting in three sets of prioritized genes for each method. To allow for a fair comparison, we used subsets of the available cohorts to create three equally sized GWAS ( $N \sim 100,000$ ). For MAGMA, we converted gene set prioritizations to gene prioritizations as described previously.<sup>72</sup> For both DEPICT and MAGMA, we then used Benchmarker<sup>72</sup> to evaluate the performance of these three sets of genes in each of the three different ancestries, resulting in three within-ancestry and six cross-ancestry scenarios.

The Benchmarker method is based on a leave-one-chromosome-out approach where one chromosome is withheld, and GWAS results for the remaining 21 chromosomes are used to prioritize genes on the withheld chromosome, iterating across each withheld chromosome. For each of the discovery GWAS ancestries, we selected the top 10% of the prioritized genes on each left out chromosome, resulting in 1,893 prioritized genes. We subsequently annotated SNPs within 50kb of the prioritized genes to generate a LD score annotation for these SNPs using LDSC.<sup>16</sup> Lastly, we applied stratified LDSC<sup>39</sup> (S-LDSC) to compare the three annotation sets to the full GWAS results for each of the three ancestries to determine whether the performance of genes prioritized and then evaluated across the same ancestry would be more enriched for heritability compared with those prioritized and evaluated in different ancestries. Reference panels were based on the 1000 Genomes Phase 3 reference panels<sup>5</sup> for LD score estimation, matching the reference panel ancestry with the GWAS results for that same ancestry. In addition, a category of SNPs that locate within 50kb of any gene in the prioritization method and a set of 53 annotations of known genomic importance were included in the S-LDSC as conditional covariates. The analysis was based on 1,217,311 HapMap3 SNPs. The results of the S-LDSC is summarized using proportional  $h^2_{\text{SNP}}$  (proportion of heritability explained by the annotation), the regression coefficient (average per-SNP contribution of the annotation to heritability), and enrichment in heritability ( $h^2$  divided by the proportion of SNPs in the annotation). To assess the performance difference between two annotations, we calculated p-values based on standard errors from the different estimates.

## Supplementary Note 6: Enrichment of SNP-based heritability from low-frequency variants within loci containing common SNPs associated with height

In this note, we quantify the enrichment of SNP-based heritability due to low-frequency SNPs (MAF<1%) in genomic loci containing common SNPs (MAF>1%) associated with height.

### Heritability enrichment from low-frequency variants in European ancestry participants

We first analysed imputed SNPs (INFO>0.3) from 3 samples of unrelated European ancestry (EUR) individuals independent from our discovery GWAS. This analysis included 44,312 participants from the Estonian Biobank (EBB), 14,587 participants of the UK Biobank (UKB) and 14,058 participants from the Lifelines Biobank (LLB), so that the total sample size is N=72,957. We partitioned SNP-heritability estimates in each of the 3 samples, then meta-analysed the results using an inverse-variance weighting scheme. The number of SNPs with MAF>0.1% was 13,040,176 in UKB (incl. 8,547,170 SNPs with MAF>1%), 11,492,146 in LLB (incl. 7,659,695 SNPs with MAF>1%) and 13,695,032 in EBB (incl. 8,620,105 SNPs with MAF>1%). We stratified SNPs into 4 classes: (1) 0.1%<MAF<1% within genome-wide significant loci (GWS), (2) 0.1%<MAF<1% outside GWS loci, (3) MAF>1% within GWS loci and (4) MAF>1% outside GWS loci. Then, we calculated genetic relationship matrices (GRM) for each group of SNPs using GCTA and estimated SNP-based heritability from fitting these 4 GRMs jointly.

**Extended Data Fig. 10** shows estimates of SNP-based heritability for each group of SNPs and each sample, as well as the meta-analysis of these estimates across the 3 EUR samples. We found consistent patterns across these samples and, therefore, hereafter focus on meta-analysed estimates. Approximately 88% (i.e.  $5.7/(5.7 + 0.78)$ ) of the SNP-based heritability of height explained by variants with 0.1%<MAF<1% is due to SNPs located within our 7,209 height-associated loci. Importantly, these analyses only implicate a fraction (approximately 4/5<sup>th</sup>, Wainschtein et al.<sup>50</sup>) of low-frequency variants with an imputation accuracy score >0.3, which limits generalisability to all low-frequency and rare variants. Nevertheless, these results suggest that rarer variants associated with height are likely to be detected in (or near) the 7209 loci identified in this study.

### Height-associated rare variants in European ancestries but common in African ancestries are enriched within GWS loci

Next, we analysed 16,374,566 SNPs with MAF>1% in African ancestries (AFR; N=661) individuals from the 1000 Genomes Project (1KG). We stratified these SNPs in two classes defined by their MAF in EUR individuals from 1KG (N=504). The first class contained 7,365,878 SNPs with a MAF>1% in EUR (47% of which had a MAF<0.1% in EUR; **Suppl. Fig. 25**), and the second one 8,114,046 SNPs with a MAF<1% in the same EUR individuals. We then quantified the enrichment of SNP-based heritability within GWS loci for both classes of variants in 6,911 AFR individuals from the UKB.

Overall, we found similar enrichments of SNP-based heritability within GWS loci for both classes of variants (**Suppl. Fig. 25a**). Therefore, assuming that causal variants for height are shared across ancestries, these results suggest that rare variants in EUR that are associated with height (at least those common enough in AFR) are also likely to be detected within these 7,209 genomic regions. Note that this class of rare variants in EUR could, in principle, be detected with large GWAS of height in AFR.

### Conclusions

In summary, we performed two orthogonal analyses, with results suggest that rare variants associated with height in EUR are enriched within our GWS loci. Additional analyses using whole-genome sequence data in large samples are required to confirm these findings as well larger GWAS of height in non-EUR populations.

## SUPPLEMENTARY REFERENCES

67. Loh, P.-R., Kichaev, G., Gazal, S., Schoech, A. P. & Price, A. L. Mixed-model association for biobank-scale datasets. *Nature Genetics* **50**, 906–908 (2018).
68. Lee, J. J. *et al.* Gene discovery and polygenic prediction from a genome-wide association study of educational attainment in 1.1 million individuals. *Nat. Genet.* **50**, 1112–1121 (2018).
69. Chen, W. *et al.* Improved analyses of GWAS summary statistics by reducing data heterogeneity and errors. *bioRxiv* 2020.07.09.196535 (2020) doi:10.1101/2020.07.09.196535.
70. Mukamel, R. E. *et al.* Protein-coding repeat polymorphisms strongly shape diverse human phenotypes. *bioRxiv* 2021.01.19.427332 (2021) doi:10.1101/2021.01.19.427332.
71. Yengo, L. *et al.* Imprint of assortative mating on the human genome. *Nature Human Behaviour* **2**, 948 (2018).
72. Fine, R. S., Pers, T. H., Amariuta, T., Raychaudhuri, S. & Hirschhorn, J. N. Benchmark: An Unbiased, Association-Data-Driven Strategy to Evaluate Gene Prioritization Algorithms. *Am J Hum Genet* **104**, 1025–1039 (2019).
